# Supplementary material for: Severity of urban cycling injuries and the relationship with personal, trip, route and crash characteristics: analyses using four severity metrics
Source: PubMed Central journal article supplement — BMJ Open. 2015 Jan 5;5(1):e006654. doi: 10.1136/bmjopen-2014-006654 (PMC4289714; doi:10.1136/bmjopen-2014-006654), 2015-01-05
Supplement: bmjopen-2014-006654.draft_revisions.pdf [file bmjopen-2014-006654.draft_revisions.pdf]

# BMJ Open

## Severity of urban cycling injuries and their relationship with personal, trip, route and crash characteristics: Experience in two Canadian cities over a 1.5 year period

|                                 |                                                                                                                                                                                                                                                                                                                                                                                                                                                                                                                                                                                                                                                                                                                                                                                                                                                               |
|---------------------------------|---------------------------------------------------------------------------------------------------------------------------------------------------------------------------------------------------------------------------------------------------------------------------------------------------------------------------------------------------------------------------------------------------------------------------------------------------------------------------------------------------------------------------------------------------------------------------------------------------------------------------------------------------------------------------------------------------------------------------------------------------------------------------------------------------------------------------------------------------------------|
| Journal:                        | <i>BMJ Open</i>                                                                                                                                                                                                                                                                                                                                                                                                                                                                                                                                                                                                                                                                                                                                                                                                                                               |
| Manuscript ID:                  | bmjopen-2014-006654                                                                                                                                                                                                                                                                                                                                                                                                                                                                                                                                                                                                                                                                                                                                                                                                                                           |
| Article Type:                   | Research                                                                                                                                                                                                                                                                                                                                                                                                                                                                                                                                                                                                                                                                                                                                                                                                                                                      |
| Date Submitted by the Author:   | 16-Sep-2014                                                                                                                                                                                                                                                                                                                                                                                                                                                                                                                                                                                                                                                                                                                                                                                                                                                   |
| Complete List of Authors:       | Cripton, Peter; University of British Columbia, Mechanical Engineering<br>Shen, Hui; University of British Columbia, School of Population and Public Health<br>Brubacher, Jeffrey; University of British Columbia, Emergency Medicine<br>Chipman, Mary; University of Toronto, Dalla Lana School of Public Health<br>Friedman, Steven; University Health Network,<br>Harris, Anne; Ryerson University, School of Occupational and Public Health<br>Winters, Meghan; Simon Fraser University, Faculty of Health Sciences<br>Reynolds, Conor; University of British Columbia, Institute for Resources, Environment and Sustainability<br>Cusimano, Michael; St. Michael's Hospital, University of Toronto,<br>Babul, Shelina; Uiversity of British Columbia, Pediatrics<br>Teschke, Kay; University of British Columbia, School of Population and Public Health |
| <b>Primary Subject Heading</b>: | Emergency medicine                                                                                                                                                                                                                                                                                                                                                                                                                                                                                                                                                                                                                                                                                                                                                                                                                                            |
| Secondary Subject Heading:      | Sports and exercise medicine                                                                                                                                                                                                                                                                                                                                                                                                                                                                                                                                                                                                                                                                                                                                                                                                                                  |
| Keywords:                       | EPIDEMIOLOGY, ACCIDENT & EMERGENCY MEDICINE, PUBLIC HEALTH                                                                                                                                                                                                                                                                                                                                                                                                                                                                                                                                                                                                                                                                                                                                                                                                    |
|                                 |                                                                                                                                                                                                                                                                                                                                                                                                                                                                                                                                                                                                                                                                                                                                                                                                                                                               |

SCHOLARONE™  
Manuscripts

1  
2  
3  
4 **Severity of urban cycling injuries and their relationship with personal, trip, route and crash**  
5 **characteristics: Experience in two Canadian cities over a 1.5 year period**  
6  
7  
8  
9

10  
11  
12 Peter A. Cripton<sup>1</sup>, Hui Shen<sup>2</sup>, Jeff R. Brubacher<sup>3</sup>, Mary Chipman<sup>4</sup>, Steven M. Friedman<sup>5,6</sup>, M. Anne  
13  
14 Harris<sup>7</sup>, Meghan Winters<sup>8</sup>, Conor C.O. Reynolds<sup>9</sup>, Michael D. Cusimano<sup>10,11</sup>, Shelina Babul<sup>12</sup>, Kay  
15  
16 Teschke<sup>2,\*</sup>  
17

18  
19  
20 \* Corresponding author

21  
22 School of Population and Public Health, University of British Columbia, 2206 East Mall,  
23  
24 Vancouver, BC, Canada, V6T 1Z3

25  
26 [kay.teschke@ubc.ca](mailto:kay.teschke@ubc.ca)

27  
28  
29 604 822-2041  
30  
31  
32

33  
34 <sup>1</sup>Department of Mechanical Engineering, University of British Columbia, Vancouver, Canada  
35

36  
37 <sup>2</sup>School of Population and Public Health, University of British Columbia, Vancouver, Canada  
38

39  
40 <sup>3</sup>Department of Emergency Medicine, University of British Columbia, Vancouver, Canada  
41

42  
43 <sup>4</sup>Dalla Lana School of Public Health, University of Toronto, Toronto, Canada  
44

45  
46 <sup>5</sup>Faculty of Medicine, University of Toronto, Toronto, Canada  
47

48  
49 <sup>6</sup>University Health Network, Toronto, Canada  
50

51  
52 <sup>7</sup>School of Occupational and Public Health, Ryerson University, Toronto, Canada  
53

54  
55 <sup>8</sup>Faculty of Health Sciences, Simon Fraser University, Burnaby, Canada  
56  
57  
58  
59  
60

1  
2  
3  
4  
5  
6  
7  
8  
9  
10  
11  
12  
13  
14  
15  
16  
17  
18  
19  
20  
21  
22  
23  
24  
25  
26  
27  
28  
29  
30  
31  
32  
33  
34  
35  
36  
37  
38  
39  
40  
41  
42  
43  
44  
45  
46  
47  
48  
49  
50  
51  
52  
53  
54  
55  
56  
57  
58  
59  
60

<sup>9</sup>Institute for Resources, Environment and Sustainability, University of British Columbia,  
Vancouver, Canada

<sup>10</sup>Division of Neurosurgery and Injury Prevention Research Office, Keenan Research Centre, St.  
Michael's Hospital, Toronto, Canada

<sup>11</sup>Departments of Surgery and Education and Public Health, University of Toronto, Toronto,  
Canada

<sup>12</sup>Department of Pediatrics, University of British Columbia, Vancouver, Canada

Abstract word count: 249

Article word count: 3710 (excluding acknowledgements)

Key words: Bicycle; injury severity; bike lanes; epidemiology

## ABSTRACT

**Objective:** To examine the relationship between cycling injury severity and personal, trip, route and crash characteristics.

**Methods:** Data from a study of adults injured in Toronto or Vancouver, Canada, were used to classify injury severity using four metrics: 1) did not continue trip by bike; 2) transported to hospital by ambulance; 3) admitted to hospital; 4) Canadian Triage and Acuity Scale (CTAS). Multiple logistic regression was used to examine associations with personal, trip, route and crash characteristics.

**Results:** Of 683 participants, 528 did not continue their trip by bike, 251 were transported by ambulance, and 60 were admitted to hospital for further treatment. Treatment urgencies included 75 as CTAS=1 or 2 (most medically urgent), 284 as CTAS=3, and 320 as CTAS=4 or 5 (least medically urgent). Older age and collision with a motor vehicle were each significantly associated with increased severity in three metrics. Factors significantly associated with more severe injuries in one metric included female sex; more frequent cycling; and crashes on multi-use paths, sidewalks or local streets, at non-intersection locations, on downhill grades, and at locations with higher motor vehicle speeds.

**Conclusions:** In two of Canada's largest cities, about one-third of the bicycle crashes were collisions with motor vehicles and the resulting injuries were more severe than in other crash circumstances, underscoring the importance of separating cyclists from motor vehicle traffic. Our results also suggest that facilities that do not mix cyclists with pedestrians and that minimize slopes would reduce both bicycling injury severity and crash risk.

## Strengths and Limitations of this Study

- This study is one of few to examine the relationship between route characteristics and severity of bicycling injuries. Its major strength was use of data from a study of bicycling injury crash risk. This made it possible to consider whether route characteristics that increased crash risk were similar to or different from those that increased bicycling injury severity.
- The results show that bike facilities that separate cyclists from motor vehicle traffic, that do not mix cyclists with pedestrians, and that minimize slopes would reduce both injury severity after a crash and reduce crash risk.
- The analyses examined four metrics covering different aspects of injury severity (not able to continue the trip by bike, transport to hospital by ambulance, admission to hospital, and treatment urgency) and identified factors that were consistently associated with increased risk: increased age and collision with a motor vehicle.
- The study included a range of injury severities resulting in emergency treatment at a hospital but did not include those so severely injured they could not remember their trip, nor those with such minor injuries that emergency treatment was not required.
- The influence of route characteristics on severity was adjusted for potential confounding by personal and trip characteristics in the regression models, but the potential for uncontrolled confounding by unmeasured characteristics remains.

## INTRODUCTION

Cycling is used for transportation and is a popular recreational activity. Its health benefits are clear, [1,2] in contrast to motor vehicle travel. Transportation cycling has risks in the same order of magnitude as driving and walking in the US and Canada.[3,4] However it is not nearly as safe as in some European countries where cycling participation is much higher.[5-8]

In 2010, there were 618 cyclist traffic deaths in the United States and 60 in Canada.[9,10] Broader data (including bicycling sports such as mountain biking) indicate that about 27,800 Americans and 4,300 Canadians were hospitalized for cycling injuries in 2009.[11,12] Although bicycling injuries are a small proportion of all traffic injuries and deaths in North America (~2 to 4%),[9,10] reducing their incidence is important because of the direct harm that they do and because they deter potential cyclists.[13-15]

The reason postulated for the inversion of cycling activity and injury risk between North America and Europe is the well-designed bicycle-specific infrastructure in Europe *vs.* its relative paucity in North America. We reviewed published studies and found that bicycle-specific infrastructure was associated with decreased injury risk, but a small range of infrastructure had been studied, often with uncertain control of exposure to risk.[16] We subsequently conducted a case-crossover study of the association between route infrastructure and crash risk in Vancouver and Toronto.[17,18]

Infrastructure that was bicycle-specific (e.g., cycle tracks separated from traffic, bike lanes) or “bicycle-friendly” (e.g., local streets with traffic diversion) had considerably lower risk. Other features were found to increase risk: streetcar or train tracks, downhill grades, construction, major street intersections, and traffic circles at local street intersections. This work was designed to estimate associations with injury risk, with a no-injury control.

1  
2  
3 An alternative line of inquiry is what factors are associated with injury severity, among those who  
4 have been injured. Many studies have found that collisions with motor vehicles increase cyclist injury  
5 severity.[11,19-22] However few authors have examined severity with respect to route  
6 infrastructure.[23-25] Higher severity has been found with grades, higher speed roads, and crashes in  
7 traffic or on shared paths.[23-25] Although these results suggest that predictors of cycling injury risk  
8 may be similar to predictors of injury severity, this is not established, and our study offers the  
9 opportunity to examine both sets of outcomes, adding a level of context for policy makers,  
10 infrastructure designers and other stakeholders. In our opinion, injury severity, not just the fact of  
11 an injury, is a second and equally important criterion used by the lay public to evaluate the apparent  
12 safety of cycling.  
13  
14

15  
16  
17 Therefore we examined the relationship between injury severity and personal, trip, route and crash  
18 characteristics using data from our study of cyclists injured in two of Canada's largest cities, Toronto  
19 and Vancouver.  
20  
21  
22  
23  
24  
25  
26

## 27 28 29 30 31 32 33 34 35 36 37 **METHODS**

38  
39  
40 Methods of study conduct and reliability testing have been described in detail elsewhere.[17,26] The  
41 study population consisted of adult ( $\geq 19$  years) residents of Toronto and Vancouver who were  
42 injured while riding a bicycle in the city and treated within 24 hours in the emergency departments  
43 of the following hospitals between May 18, 2008 and November 30, 2009: St. Paul's or Vancouver  
44 General in Vancouver; St. Michael's, Toronto General or Toronto Western in Toronto. Those who  
45 were fatally injured or so severely injured that they were unable to remember their trip were not  
46 eligible to participate.  
47  
48  
49  
50  
51  
52  
53  
54  
55  
56  
57  
58  
59  
60

1  
2  
3 Data on characteristics related to severity were abstracted from emergency department records. In  
4  
5 addition, eligible participants were interviewed in person by trained interviewers about personal  
6  
7 characteristics, trip characteristics, and crash circumstances, using a structured questionnaire  
8  
9  
10 (<http://cyclingingcities.spph.ubc.ca/files/2011/10/InterviewFormFinal.pdf>).  
11

12  
13 The study was not designed to focus on severity, so the data did not include classical severity scoring  
14  
15 using the Abbreviated Injury Scale. However we did have access to four other indicators of severity:  
16

- 17  
18 1. Whether the subject continued their trip by bicycle (self-reported in the interview), no vs. yes
- 19  
20 2. Whether the subject was transported by ambulance (hospital data), yes vs. no
- 21  
22 3. Whether the subject was admitted to hospital (hospital data), yes vs. no
- 23  
24 4. Canadian Triage and Acuity Scale (CTAS) (hospital data), levels 1 to 5, defined as  
25  
26 follows:[27,28]

- 27  
28  
29 • 1 – Resuscitation; need to be seen immediately
- 30  
31 • 2 – Emergent; need to be seen within 15 minutes
- 32  
33 • 3 – Urgent; need to be seen within 30 minutes
- 34  
35 • 4 – Less urgent; need to be seen within 60 minutes
- 36  
37 • 5 – Non urgent, need to be seen within 120 minutes
- 38  
39  
40  
41

42  
43 Site observations were made to document characteristics of crash and control sites, and allow route  
44  
45 infrastructure classification.[17,18] The observations were made blind to whether an injury took  
46  
47 place at the site or not. In the current analysis, only the crash site data was used.  
48

49  
50 Unconditional logistic regression was used to examine associations of each of the following  
51  
52 independent variables with each severity outcome metric:  
53  
54  
55  
56  
57  
58  
59  
60



- personal characteristics: sex; age; how frequently he/she cycled; whether the cyclist considered himself/herself experienced, had taken a cycling training course, had a driver's license
- trip characteristics: time of day; weather; helmet use; use of visible clothing on the trunk; use of bike lights; alcohol and drug use in the 6 hours prior
- crash circumstances: collision (with a motor vehicle, obstacle, surface feature, cyclist, pedestrian, or animal) vs. fall; collision with a motor vehicle vs. not; motor vehicle "involvement" (i.e., both direct collisions with vehicles and crashes resulting from motor vehicle avoidance manoeuvres) vs. not
- route characteristics at the injury crash site: type of route; intersection location; presence of bike signage; junctions; construction; streetcar tracks; grade; average vehicle speed; distance visible along route.

All independent variables significant in simple logistic regression (unadjusted analysis) were included in multiple regression models for all four severity metrics. The rationale for this broad inclusion of variables in the final models was to maximize control of potential confounding by personal and trip characteristics and to allow readers to compare results across severity metrics.

For dichotomous severity metrics (did not continue by bike, ambulance transport, hospital admission), traditional logistic regression was used. For CTAS, ordinal logistic regression modeled the odds of a more severe CTAS group, after verifying that the proportional odds assumption was valid. CTAS categories were grouped as follows: most severe, levels 1 or 2; moderate severity, 3; least severe, 4 or 5.

## RESULTS

The study included 690 injured cyclists (414 in Vancouver, 276 in Toronto). Seven were unable to recall their crash circumstances, so were removed from analyses; none of these continued by bike, six were transported by ambulance, their CTAS scores were either 1 or 2, and one was admitted to hospital. After these subjects were excluded, 683 subjects remained for most analyses, though four additional subjects did not have information on CTAS or ambulance transport.

Most participants were men (59%), younger than 40 years (63%), regular cyclists (88% cycled  $\geq$  52 times per year), and had a drivers' license (90%), but few had taken a cycling training course (6%).

On the trip when the injury occurred, 69% were wearing a helmet, 33% were wearing bright clothing on their torso, 19% were using bike lights, and 10% had consumed alcohol and 11% had consumed drugs in the previous 6 hours. Most of the trips were on weekdays (77%), during daylight hours (78%), and in clear weather (70%). Most of the injury sites were on streets with no cycling infrastructure (42% on major streets, 27% on local streets) *vs.* 8% on sidewalks, 11% on multi-use paths, and 12% on bicycle-specific infrastructure (bike lanes, cycle tracks, off-street bike paths).

Other conditions at the injury sites included the following: 31% were at intersections, 38% were on downhill grades, 12% had construction present, and 87% had junctions in the last 100 meters.

Most of the crashes were collisions (74%  $n=506$ ; with motor vehicles,  $n=231$ ; cyclists, pedestrians or animals,  $n=40$ ; obstacles,  $n=69$ ; streetcar tracks,  $n=97$ ; and other surface features,  $n=69$ ) rather than falls (26%,  $n=177$ ). Crashes "involving" motor vehicles (48%,  $n=330$ ) included direct collisions, as well as crashes to avoid collisions ( $n=99$ ).

Figure 1 shows the distribution of subjects by the four severity metrics. Figure 2 shows the severity metrics against crash circumstances, classified three ways. Collisions tended to be more severe than falls, and crashes "involving" motor vehicles tended to be more severe than those not. Direct

1  
2  
3 collisions with motor vehicles had the highest proportion in the more severe category of every  
4  
5 metric except admitted to hospital. In unadjusted analyses, collision (of any type) and motor vehicle  
6  
7 “involvement” both had elevated odds ratios for the same severity metrics as motor vehicle collision  
8  
9 (data not shown), but the odds ratios were lower, indicating that it was direct collision with a motor  
10  
11 vehicle that led to increased severity. Only the motor vehicle collision variable was included in  
12  
13 multiple regression models.  
14  
15

16  
17  
18 Table 1 shows the results of the multiple logistic regression models for each severity metric,  
19  
20 including all independent variables statistically significant in at least one unadjusted analysis. Four  
21  
22 personal characteristic variables were included: age, sex, cycling experience, and cycling frequency.  
23  
24 Age showed consistent associations across all severity metrics; older age groups had more severe  
25  
26 injuries, significantly so for ambulance transport, admission to hospital and CTAS. Women were  
27  
28 significantly more likely to stop their trip by bike than men. There was a tendency for more  
29  
30 experienced and more regular cyclists to have higher injury severity, though only one association was  
31  
32 statistically significant in multiple regression.  
33  
34

35  
36 Cyclists whose crash was a direct collision with a motor vehicle had elevated odds ratios for all  
37  
38 severity metrics, statistically significant for not continuing by bike, being transported by ambulance  
39  
40 and more urgent triage score (CTAS). Those whose crash sites were on multi-use paths, sidewalks  
41  
42 and local streets tended to have more severe injuries than those who crashed on major streets;  
43  
44 significant associations were observed for certain associations with ambulance transport and hospital  
45  
46 admission. Crashes at intersections had inconsistent results; the only significant odds ratio indicated  
47  
48 that those injured at an intersection were less likely to stop their trip by bike. Downhill grades were  
49  
50 consistently related to greater injury severity, significantly so for transportation by ambulance. The  
51  
52 same pattern was observed for higher average motor vehicle speeds at the crash location. Time of  
53  
54  
55  
56  
57  
58  
59  
60

day and presence of streetcar tracks were both significant in some unadjusted analyses, but did not remain so in multiple regression.

**Table 1.** Odds ratios (OR) and 95% confidence intervals (CI) for associations between metrics of injury severity and personal, trip, crash circumstance, and route characteristics (N=683). Multiple logistic regression models; all independent variables significant in at least one unadjusted analysis included.

|                                                     | Descriptive statistics | Did not continue by bike<br>N=528 (77%)<br>OR (95% CI) | Transported to hospital by ambulance<br>N=251 (37%)<br>OR (95% CI) | Admitted to hospital<br>N=60 (8.8%)<br>OR (95% CI) | CTAS †<br>1 or 2, N=75 (11%)<br>3, N=284 (42%)<br>4 or 5, N=320 (47%)<br>OR (95% CI) |
|-----------------------------------------------------|------------------------|--------------------------------------------------------|--------------------------------------------------------------------|----------------------------------------------------|--------------------------------------------------------------------------------------|
| <b>Sex</b>                                          |                        |                                                        |                                                                    |                                                    |                                                                                      |
| Male                                                | 404 (59%)              | 1 (reference)                                          | 1 (reference)                                                      | 1 (reference)                                      | 1 (reference)                                                                        |
| Female                                              | 279 (41%)              | <b>1.91 (1.26 – 2.92)</b>                              | 1.34 (0.93 – 1.93)                                                 | 1.07 (0.59 – 1.94)                                 | 0.98 (0.71 – 1.35)                                                                   |
| <b>Age</b>                                          |                        |                                                        |                                                                    |                                                    |                                                                                      |
| 19 to 29                                            | 262 (39%)              | 1 (reference)                                          | 1 (reference)                                                      | 1 (reference)                                      | 1 (reference)                                                                        |
| 30 to 39                                            | 167 (25%)              | 1.15 (0.70 – 1.88)                                     | 1.18 (0.75 – 1.85)                                                 | 1.18 (0.54 – 2.61)                                 | 1.29 (0.87 – 1.91)                                                                   |
| 40 to 49                                            | 115 (17%)              | 1.22 (0.70 – 2.14)                                     | 1.40 (0.83 – 2.34)                                                 | 1.96 (0.89 – 4.33)                                 | <b>2.07 (1.33 – 3.23)</b>                                                            |
| 50 to 59                                            | 81 (12%)               | 1.50 (0.77 – 2.95)                                     | 1.04 (0.57 – 1.91)                                                 | 1.02 (0.35 – 2.97)                                 | 1.57 (0.95 – 2.62)                                                                   |
| ≥ 60                                                | 55 (8%)                | 1.33 (0.63 – 2.82)                                     | <b>2.57 (1.31 – 5.05)</b>                                          | <b>3.52 (1.37 – 9.04)</b>                          | 1.42 (0.78 – 2.60)                                                                   |
| <b>Considered themselves an experienced cyclist</b> |                        |                                                        |                                                                    |                                                    |                                                                                      |
| No                                                  | 46 (7%)                | 1 (reference)                                          | 1 (reference)                                                      | 1 (reference)                                      | 1 (reference)                                                                        |
| Yes                                                 | 637 (93%)              | 1.36 (0.63 – 2.95)                                     | 2.16 (0.97 – 4.83)                                                 | 1.03 (0.28 – 3.84)                                 | 1.52 (0.78 – 2.95)                                                                   |
| <b>Cycling frequency °<br/>(trips/year)</b>         |                        |                                                        |                                                                    |                                                    |                                                                                      |
|                                                     | mean = 152<br>SD = 81  | 1.00 (0.78 – 1.76)                                     | 0.92 (0.72 – 1.08)                                                 | 1.18 (0.85 – 1.50)                                 | <b>1.18 (1.00 – 1.38)</b>                                                            |
| <b>Time of day</b>                                  |                        |                                                        |                                                                    |                                                    |                                                                                      |
| Day                                                 | 530 (78%)              | 1 (reference)                                          | 1 (reference)                                                      | 1 (reference)                                      | 1 (reference)                                                                        |
| Dusk or dawn                                        | 50 (7%)                | 0.65 (0.33 – 1.29)                                     | 0.53 (0.24 – 1.13)                                                 | 0.75 (0.21 – 2.62)                                 | 0.72 (0.39 – 1.30)                                                                   |
| Night                                               | 103 (15%)              | 0.90 (0.53 – 1.54)                                     | 1.16 (0.71 – 1.90)                                                 | 1.87 (0.90 – 3.86)                                 | 0.90 (0.58 – 1.40)                                                                   |
| <b>Motor vehicle collision</b>                      |                        |                                                        |                                                                    |                                                    |                                                                                      |
| No                                                  | 452 (66%)              | 1 (reference)                                          | 1 (reference)                                                      | 1 (reference)                                      | 1 (reference)                                                                        |
| Yes                                                 | 231 (34%)              | <b>3.46 (2.07 – 5.76)</b>                              | <b>3.66 (2.44 – 5.48)</b>                                          | 1.27 (0.63 – 2.54)                                 | <b>2.03 (1.41 – 2.90)</b>                                                            |
| <b>Route type *</b>                                 |                        |                                                        |                                                                    |                                                    |                                                                                      |
| Major street                                        | 288 (42%)              | 1 (reference)                                          | 1 (reference)                                                      | 1 (reference)                                      | 1 (reference)                                                                        |
| Local street                                        | 187 (27%)              | 1.08 (0.61 – 1.92)                                     | 1.44 (0.86 – 2.39)                                                 | <b>2.76 (1.15 – 6.62)</b>                          | 1.18 (0.75 – 1.84)                                                                   |
| Sidewalk                                            | 52 (8%)                | 1.15 (0.42 – 3.19)                                     | <b>3.72 (1.37 – 10.1)</b>                                          | 3.26 (0.51 – 20.7)                                 | 1.31 (0.56 – 3.06)                                                                   |
| Multi-use path                                      | 74 (11%)               | 1.33 (0.52 – 3.44)                                     | 2.18 (0.83 – 5.77)                                                 | <b>7.56 (1.43 – 40.0)</b>                          | 1.22 (0.55 – 2.68)                                                                   |
| Bicycle-specific infrastructure                     | 82 (12%)               | 0.98 (0.50 – 1.94)                                     | 1.02 (0.55 – 1.89)                                                 | 0.89 (0.27 – 2.99)                                 | 1.27 (0.74 – 2.18)                                                                   |
| <b>Intersection</b>                                 |                        |                                                        |                                                                    |                                                    |                                                                                      |

|                                                           |                       |                           |                           |                    |                    |
|-----------------------------------------------------------|-----------------------|---------------------------|---------------------------|--------------------|--------------------|
| No                                                        | 472 (69%)             | 1 (reference)             | 1 (reference)             | 1 (reference)      | 1 (reference)      |
| Yes                                                       | 211 (31%)             | <b>0.57 (0.36 – 0.88)</b> | 1.44 (0.98– 2.13)         | 1.04 (0.53 – 2.04) | 0.89 (0.63 – 1.26) |
| <b>Streetcar or train tracks</b>                          |                       |                           |                           |                    |                    |
| No                                                        | 534 (78%)             | 1 (reference)             | 1 (reference)             | 1 (reference)      | 1 (reference)      |
| Yes                                                       | 149 (22%)             | 1.11 (0.65 – 1.91)        | 1.03 (0.63 – 1.70)        | 0.98 (0.39 – 2.47) | 1.36 (0.88 – 2.10) |
| <b>Grade</b>                                              |                       |                           |                           |                    |                    |
| Flat or uphill                                            | 354 (52%)             | 1 (reference)             | 1 (reference)             | 1 (reference)      | 1 (reference)      |
| Downhill                                                  | 329 (48%)             | 1.32 (0.89 – 1.96)        | <b>1.62 (1.14 – 2.32)</b> | 1.23 (0.68 – 2.22) | 1.31 (0.96 – 1.79) |
| <b>Motor vehicle speed</b> <sup>°</sup> $\beta$<br>(km/h) | mean = 36<br>SD = 9.5 | 1.05 (0.89 – 1.24)        | <b>1.21 (1.01 – 1.43)</b> | 1.24 (0.91 – 1.69) | 1.08 (0.94 – 1.24) |

† CTAS = Canadian Triage and Acuity Scale, grouped into 3 categories for analysis using ordinal logistic regression; the odds ratio represents the comparison of categories 1 & 2 vs. 3, 4 & 5 and categories 1, 2 & 3 vs. 4 & 5 under the proportional odds assumption

\* Major streets included arterials and collectors with no bicycle infrastructure or shared lanes;

Local streets were mainly residential and included those designated as bikeways;

Multi-use paths were paths designated for pedestrian and bicyclists;

Bicycle-specific infrastructure included bike lanes on major streets, cycle tracks (separated bike lanes) alongside major streets, and off-street bike paths.

° Odds ratios and confidence intervals for continuous variables calculated for a one standard deviation increase

$\beta$  Average motor vehicle speed at the crash site, measured 5 times during site observations using a Bushnell Velocity Speed Gun (Overland Park, KS)

The following independent variables were not associated with any of the injury severity metrics in unadjusted analyses and were not included in multiple regression: whether the participant had taken a cycling training course or had a driver's license; weather; use of a helmet, visible clothing on the trunk, or bike lights; alcohol or drug use in the 6 hours prior to the trip; presence of bike signage, junctions, or construction; and distance visible along the route.

## DISCUSSION

In this study, using four severity metrics that spanned rider self-evaluation (unable to continue by bike) to clinical-practitioner evaluation (CTAS), we found that the following characteristics were associated with more severe injuries: older age; female sex; more experience and frequency of cycling; collision with a motor vehicle; crash on a multi-use path, sidewalk or local street, at non-intersection location, on a downhill grade, and at locations with higher motor vehicle speeds.

### Personal Characteristics

1  
2  
3 Older age has frequently been associated with more severe injuries in bicycling crashes.[19-22, 29-33]  
4  
5 We observed the same for all metrics, though the odds ratio was not always statistically significant.  
6  
7  
8 This pattern is attributed to increasing frailty with age and has been observed for all vulnerable road  
9  
10 users.[32]

11  
12  
13 Although sex has frequently been associated with bicycling injury severity, the evidence does not  
14  
15 show a clear pattern. We found that women were less likely to continue their trip by bicycle and had  
16  
17 a non-significant increased chance of ambulance transport. Moore *et al.* found women to have more  
18  
19 severe injuries,[31] but others have found higher severities in men.[19,22,32] Theories for each of  
20  
21 these results are available. The smaller average size of women may make them more vulnerable and  
22  
23 men may be more comfortable handling minor injuries without help. A greater propensity for risk-  
24  
25 taking and speed may provide opportunities for men to have higher impact crashes.[34-36]  
26  
27

28  
29 We found that experienced cyclists and those cycled more frequently had greater injury severity  
30  
31 (more likely to need ambulance transport, or to have a more urgent triage score, respectively).  
32  
33

34 Similarly Heesh *et al.* found that frequent and experienced cyclists had more severe injuries.[21]  
35

36 These cyclists may travel at higher speeds and incur higher impact forces in a crash.  
37  
38

### 39 **Crash Circumstances**

40  
41  
42 About a third of the injuries were collisions with motor vehicles. These were strongly associated  
43  
44 with three of our four injury severity metrics. In other research, collisions with motor vehicles have  
45  
46 consistently been associated with increased severity.[11,19-22] Collisions with larger vehicles have  
47  
48 resulted in more severe injuries and fatalities.[29,31,33,37]  
49  
50

51  
52 Previous analyses showed that collisions with motor vehicles were associated with route type in our  
53  
54 study.[38] They never occurred on off-street bike paths or on cycle tracks (separated bike lanes), and  
55  
56 were over-represented on major streets with parked cars and no bike infrastructure. We considered  
57  
58  
59  
60

1  
2  
3 whether route type confounded the association between collision with a motor vehicle and severity  
4  
5 (and vice versa), but this was not the case, nor was there interaction between the two variables (data  
6  
7 not shown).  
8  
9

10 The severity of direct collisions with motor vehicles provides clear rationale for transportation  
11  
12 planners to minimize interactions between cyclists and vehicles. This planning approach is  
13  
14 supported by the results of our earlier analyses of injury crash risk: cycle tracks (bike lanes that  
15  
16 physically separate cyclists and motor vehicle traffic) were associated with 1/9<sup>th</sup> the risk compared to  
17  
18 streets with no bicycle infrastructure.[17] Separating modes of traffic with large differences in speed  
19  
20 and mass is a principle used by countries such as Sweden, Germany, Denmark and the Netherlands  
21  
22 where bicycling injury risk is much lower than in North America.[6,8]  
23  
24  
25  
26

### 27 **Route Characteristics**

28  
29 Our main interest in this analysis was to determine whether route characteristics were associated  
30  
31 with increased or reduced injury severity. Route type, presence of an intersection, grade, and average  
32  
33 motor vehicle speed at the crash location were all associated with injury severity.  
34  
35  
36

37 In comparison to crashes on major streets without cycling infrastructure, crashes on sidewalks and  
38  
39 multi-use paths had considerably higher odds of ambulance transport (odds ratio for multi-use paths  
40  
41 not significant). Crashes on sidewalks and multi-use paths also had considerably higher odds of  
42  
43 hospital admission (odds ratio for sidewalks not significant). In our earlier analyses of crash risk,  
44  
45 multi-use paths and sidewalks had among the highest, despite being off-street.[17,18] The increased  
46  
47 severity after a crash adds to concern about these route types. Local streets (mainly residential  
48  
49 streets) were found to be a safe route type in our earlier analyses, with only about half the risk of a  
50  
51 crash.[17] The current analysis indicates that if a crash did occur, there was an increased odds of one  
52  
53 severity measure – hospitalization.  
54  
55  
56  
57  
58  
59  
60

1  
2  
3 Few studies have examined route type and injury severity. De Rome *et al.* found that more severe  
4 injuries were associated with crashes in traffic and on multi-use paths, and less severe with crashes in  
5 bike lanes and on sidewalks.[25] Slaughter *et al.* found lower severity in bike lane crashes. In our  
6 study, bicycle-specific infrastructure was not associated with severity.[39]  
7  
8  
9

10  
11  
12 Intersection vs. non-intersection crash locations did not present a clear pattern of association with  
13 severity in this study. Moore *et al.* found differing patterns of injury severity at intersections and non-  
14 intersections.[31]  
15  
16  
17  
18  
19

20  
21 Downhill grade was significantly associated with increased severity for all metrics in unadjusted  
22 analyses, and remained significant in the final model for ambulance transport. Three previous studies  
23 have shown that injury severity is greater with grades.[23,24,31] Downhill grade is likely to be  
24 associated with increased cyclist (and motor vehicle) speed, and therefore increased force of impact.  
25  
26  
27  
28  
29 Our earlier analyses found that downhill slopes were associated with higher injury crash risk, and  
30 that uphill grades deter cycling.[15,17,18] This suggests that, wherever possible, routing bicycle  
31 facilities where slopes are gentle is a good strategy for both reducing injuries and motivating cycling.  
32  
33  
34  
35  
36

37  
38 Higher average motor vehicle speed was associated with increased severity for all metrics, and  
39 remained significant in the final model for ambulance transport. Other studies found higher speed  
40 roads to be associated with greater injury severity to cyclists.[23,24,37] Our earlier analyses found  
41 that injury crash risk was lower at intersections where motor vehicle speeds were 30 km/h or lower  
42 and that routes with high vehicle speeds deter cycling.[15,18] This supports recent changes in some  
43 European and North American cities to lower urban speed limits.  
44  
45  
46  
47  
48  
49  
50

### 51 **Trip Characteristics**

52

53  
54 Only one trip characteristic was associated with injury severity. Time of day (night riding) was  
55 associated with a higher odds of hospital admission in unadjusted analyses and was elevated but not  
56  
57  
58  
59  
60



1  
2  
3 significant in multiple regression. Night-time riding has been associated with increased injury  
4 severity in other studies, especially where roadways were not lit.[24,29,32,33]  
5  
6  
7

8 Although much of the bicycle safety literature focuses on helmets and head injury mitigation,  
9 [22,37,40,41,42] helmet use was not associated with any of the severity metrics in this study. Both  
10 biomechanical studies[42] and epidemiological studies[22,37,40,41] have demonstrated that helmets  
11 can prevent serious skull and brain injuries. This study was not limited to head injuries, likely  
12 contributing to our result that helmet use was not associated with injury severity. In one of the  
13 largest studies to examine helmets, their use was found to significantly reduce head injuries, but was  
14 not associated with serious injury mitigation across all body regions.[22,41] In this context, it is  
15 important to recognize that cyclists may sustain injuries, including serious trauma, to any body part,  
16 including their thorax, abdomen, neck and extremities.[22] A helmet can do nothing to prevent non-  
17 head injuries. Our earlier analyses of crash risk show the potential for all injuries to be significantly  
18 decreased for cyclists separated from motor vehicle traffic in a cycle track or a local street with  
19 traffic diversion[17,18] and the present results show that injury severity significantly increases in a  
20 collision with a motor vehicle. Together these results point to bicycle infrastructure that physically  
21 separates cyclists from motor vehicle traffic to prevent trauma to any area of the body.  
22  
23  
24  
25  
26  
27  
28  
29  
30  
31  
32  
33  
34  
35  
36  
37  
38  
39  
40

#### 41 **Strengths and limitations**

42  
43  
44 Strengths of the study include two study cities with differing climates, terrain, cycling mode shares  
45 and cycling infrastructure, an urban-only cycling sample, the prospective accrual of subjects,  
46 observation of route characteristics blinded to whether the site was an injury site, and the number of  
47 clinical and cyclist self-report severity metrics that we used.  
48  
49  
50

51  
52  
53  
54 Study limitations include a relatively small sample of injured cyclists, restriction to Canadian cities  
55 and lack of data on the anatomical location of the injury. As in all injury studies, only a portion of  
56  
57  
58  
59  
60

1  
2  
3 injured cyclists were included; here, those whose injuries were serious enough to be treated at a  
4  
5 hospital emergency department, but not to cause death or a head injury so severe that the trip could  
6  
7 not be recalled. This reduced the pool of the most severely injured cases: 2 potential participants  
8  
9 were fatally injured, 26 of those contacted could not remember their route, and 7 could not recall  
10  
11 their crash circumstances. An unknown number of cyclists had injuries so minor that no emergency  
12  
13 department visit was made.  
14  
15

16  
17  
18 Our overall study had a case-crossover design to fully control for differences between individuals  
19  
20 and between trips that could confound the relationship between injury crash risk and infrastructure  
21  
22 (the focus of the main study). To examine severity of injuries in the current analysis, the analysis was  
23  
24 restricted to cases only, introducing the potential for confounding by personal and trip  
25  
26 characteristics. We addressed this via adjustment in our regression models, but the potential for  
27  
28 uncontrolled confounding by unmeasured characteristics remains.  
29  
30

31  
32 Given that we did not have data on more traditional measures of severity, the Abbreviated Injury  
33  
34 Scale and Injury Severity Score, it is important to consider our outcome metrics, their relationship to  
35  
36 each other and their potential reliability and validity as measures of severity. The four metrics  
37  
38 measured different aspects of severity, as shown by their low correlations (Table 2).  
39  
40  
41  
42

43 **Table 2.** Pearson correlations between the four metrics of severity used in this study

|                                      | Did not<br>continue<br>by bike | Transported<br>to hospital by<br>ambulance | Admitted to<br>hospital | CTAS  |
|--------------------------------------|--------------------------------|--------------------------------------------|-------------------------|-------|
| Did not continue by bike             | 1                              | 0.40                                       | 0.17                    | -0.29 |
| Transported to hospital by ambulance | 0.40                           | 1                                          | 0.24                    | -0.39 |
| Admitted to hospital                 | 0.17                           | 0.24                                       | 1                       | -0.20 |
| CTAS                                 | -0.29                          | -0.39                                      | -0.20                   | 1     |

44  
45  
46  
47  
48  
49  
50  
51  
52  
53 Note: Correlations with CTAS were all negative because the scale was in the opposite direction, with 1 = most urgent  
54 and 5 = least urgent. All the others were assigned 1 = more vs. 0 = less severe.  
55  
56  
57  
58  
59  
60

1  
2  
3 Hospital admission is based on an in depth medical assessment and should reflect the most severe  
4 injuries. There are no standardized decision criteria, and physicians' decisions to admit emergency  
5 department patients to hospital have been found to differ substantially.[43] Data from Rivara *et al.*  
6 were available to compare hospitalization to Injury Severity Scores above *vs.* below 9.[22]  
7

8  
9  
10  
11  
12 Hospitalization had high specificity (0.94) but lower sensitivity (0.72), suggesting that few patients  
13 with minor injuries are admitted to hospital, but some who are severely injured are not admitted.  
14

15  
16  
17 This could be because some patients with severe injuries (e.g., some extremity fractures, intra-  
18 abdominal trauma) may be treated and stabilized in an emergency department then discharged home,  
19 but scheduled for later surgical repair. This may have contributed to our somewhat different results  
20 for hospital admission and its lower correlations with the other metrics.  
21  
22  
23  
24  
25

26  
27 Ambulance transport is based, in part, on whether or not someone at the scene called an ambulance.  
28

29 It had the strongest correlations with all other outcome metrics. Data from Lang *et al.* were available  
30 to compare ambulance transport to Injury Severity Scores above *vs.* below 12.[44] Ambulance  
31 transfer had low specificity (0.26) but high sensitivity (0.95), opposite to the pattern for  
32 hospitalization. This suggests that most severely injured patients are transported by ambulance, but  
33 so are many who are not severely injured.  
34  
35  
36  
37  
38  
39

40  
41 The CTAS triage scale is based on assessment by a triage nurse of a standardized list of presenting  
42 complaints, vital sign modifiers, and pain severity.[27] Certain injury mechanisms, e.g., being hit by a  
43 motor vehicle, may be assigned a greater urgency score. CTAS has been frequently tested for  
44 reliability, with kappas for agreement beyond chance spanning a broad range from 0.25 to 0.89.<sup>28</sup>  
45  
46  
47  
48

49 We found no comparison of CTAS to Injury Severity Scores. We found no validity or reliability data  
50 for continuing to cycle.  
51  
52  
53  
54  
55  
56  
57  
58  
59  
60

## CONCLUSIONS

In two of Canada's largest cities, approximately one-third of the bicycle crashes were collisions with a motor vehicle and the resulting injuries were more severe than in other crash circumstances.

Certain route types (in particular multi-use paths and sidewalks), downhill grades, and higher motor vehicle speeds were also associated with increased injury severity. These results suggest an urgent need to provide bike facilities that separate cyclists from motor vehicle traffic, that do not mix cyclists with pedestrians, and that minimize slopes. These bicycle infrastructure modifications would reduce both crashes and injury severity after a crash.

**ACKNOWLEDGEMENTS:** We would like to thank all the study participants for generously contributing their time. We appreciate the work of study staff, hospital personnel and our city and community collaborators. This study evolved from work conducted in the University of British Columbia's Bridge Program Grant Development course (2005-2006) and benefitted from input from the participants of that class.

**CONTRIBUTORS:** KT, MAH, CCOR, and PC were responsible for initial conception and design of the study. KT, MAH, CCOR, PC, MW, SB, MC, MDC, JB, SMF, Gath Hunte and Kishore Mulpuri were responsible for the funding proposal. CCOR, MAH, MW, MDC, KT, Melody Monroe and Lee Vernich designed and tested data collection instruments. MW, HS and KT developed algorithms for defining route infrastructure. HS was responsible for data analyses. All authors had full access to the results of all analyses. PC, HS and KT drafted the article. All authors contributed to study design and implementation, analysis decisions, interpretation of results, and critical revision of the article. Evan Beaupré, Niki Blakely, Jill Dalton, Martin Kang, Kevin McCurley, and Andrew Thomas were responsible for interviews or site observations. Vartouji Jazmaji, Melody Monroe and

1  
2  
3 Lee Vernich were responsible for supervision and training of study staff, and recruitment of  
4  
5 participants. Barb Boychuk, Jan Buchanan, Doug Chisholm, Nada Elfeki, Garth Hunte, JB, SMF,  
6  
7 and MDC contributed to identification of injured cyclists at the study hospitals. Jack Becker, Bonnie  
8  
9 Fenton, David Hay, Nancy Smith Lea, Peter Sary, Fred Sztabinski, David Tomlinson, and Barbara  
10  
11 Wentworth reviewed the study protocol, data collection forms, and infrastructure definitions from  
12  
13 the perspective of professionals or advocates involved in cycling transportation. Data were double  
14  
15 entered by Express Data Ltd.  
16  
17

18  
19  
20 **FUNDING:** This work was supported by a grant from the Heart and Stroke Foundation of Canada  
21  
22 and the Canadian Institutes of Health Research (Institute of Musculoskeletal Health and Arthritis  
23  
24 and Institute of Nutrition, Metabolism and Diabetes) (Grant number: BEO-85863). J. R. Brubacher,  
25  
26 M.A. Harris, and M. Winters were supported by salary awards from the Michael Smith Foundation  
27  
28 for Health Research. M. A. Harris, C. C. O. Reynolds, and M. Winters were supported by salary  
29  
30 awards from the Canadian Institutes of Health Research.  
31  
32

33  
34  
35 **COMPETING INTERESTS:** None.  
36

37  
38 **PATIENT CONSENT:** Obtained  
39

40  
41 **ETHICS APPROVAL:** The study methods were reviewed and approved by the human subjects  
42  
43 ethics review boards of the University of British Columbia (BREB REB H06-03833), the University  
44  
45 of Toronto (#22628), St. Paul's Hospital (BREB REB H06-03833), Vancouver General Hospital  
46  
47 (#V07-0275), St. Michael's Hospital (REB 08-046C), and the University Health Network (Toronto  
48  
49 General Hospital and Toronto Western Hospital; REB 07-0839-AE). All participants gave informed  
50  
51 consent before taking part in the study.  
52  
53  
54  
55  
56  
57  
58  
59  
60

**DATA SHARING STATEMENT:** The study database was compiled from interviews with study participants and site observations by study personnel. It cannot be shared by the authors with anyone without approval from the University and Hospital human subjects review boards.

## REFERENCES

1. Hamer M, Chida Y. Active commuting and cardiovascular risk: a meta-analytic review. *Prev Med* 2008;46(1):9–13
2. Wen LM, Rissel C. Inverse associations between cycling to work, public transport, and overweight and obesity: findings from a population based study in Australia. *Prev Med* 2008;46(1):29–32
3. Beck LF, Dellinger AM, O’Neil ME. Motor vehicle crash injury rates by mode of travel, United States: using exposure-based methods to quantify differences. *Am J Epidemiol* 2007;166(2):212–218
4. Teschke K, Harris MA, Reynolds CCO, *et al.* Exposure-based traffic crash injury rates by mode of travel in British Columbia. *Can J Public Health* 2013;104(1):e75–79
5. Parkin J. Comparisons of cycle use for the journey to work from the ’81, ’91 and 2001 censuses. *Traffic Eng Control* 2003;44(8):299-302
6. Pucher J, Buehler R. Making cycling irresistible: lessons from the Netherlands, Denmark and Germany. *Transp Rev* 2008;28(4):495–528
7. Pucher J, Buehler R, Seinen M. Bicycling renaissance in North America? An update and re-appraisal of cycling trends and policies. *Transp Res Part A Policy Pract* 2011;45(6):451-475
8. Jacobsen PL. Safety in numbers: more walkers and bicyclists, safer walking and bicycling. *Inj Prev* 2003;9(3):205–209.

- 1  
2  
3 9. NHTSA *Traffic Safety Facts 2010 Data. Bicyclists and other cyclists.* 2010
- 4  
5  
6 10. Transport Canada. *Canadian Motor Vehicle Traffic Collision Statistics: 2010.* 2013
- 7  
8 11. Hamann C, Peek-Asa C. On-road bicycle facilities and bicycle crashes in Iowa, 2007–2010.  
9  
10 *Accid Anal Prev* 2013;56:103–109
- 11  
12 12. Canadian Institute for Health Information. *Cycling Injury Hospitalizations in Canada, 2009-2010.*  
13  
14 2012
- 15  
16  
17 13. Noland RB. Perceived risk and modal choice: risk compensation in transportation systems.  
18  
19 *Accid Anal Prev* 1995;27(4):503–521
- 20  
21  
22 14. Ogilvie D, Egan M, Hamilton V, *et al.* Promoting walking and cycling as an alternative to  
23  
24 using cars: systematic review. *BMJ* 2004;329(7469):763
- 25  
26  
27 15. Winters M, Brauer M, Setton EM, *et al.* Built environment influences on healthy  
28  
29 transportation choices: bicycling versus driving. *J Urban Health* 2010;87(6):969–993
- 30  
31  
32 16. Reynolds CC., Anne Harris M, Teschke K, *et al.* The impact of transportation infrastructure  
33  
34 on bicycling injuries and crashes: a review of the literature. *Environ Health* 2009;8(1):1–19
- 35  
36  
37 17. Teschke K, Harris MA, Reynolds CCO, *et al.* Route infrastructure and the risk of injuries to  
38  
39 bicyclists: A case-crossover study. *Am J Public Health* 2012;102(12):2336–2343
- 40  
41  
42 18. Harris MA, Reynolds CCO, Winters M, *et al.* Comparing the effects of infrastructure on  
43  
44 bicycling injury at intersections and non-intersections using a case-crossover design. *Inj Prev*  
45  
46 2013;19:303-310
- 47  
48  
49 19. Boström L, Nilsson B. A review of serious injuries and deaths from bicycle accidents in  
50  
51 Sweden from 1987 to 1994. *J Trauma* 2001;50(5):900–907
- 52  
53  
54 20. Chong S, Poulos R, Olivier J, *et al.* Relative injury severity among vulnerable non-motorised  
55  
56 road users: comparative analysis of injury arising from bicycle-motor vehicle and bicycle-  
57  
58 pedestrian collisions. *Accid Anal Prev* 2010;42(1):290–296
- 59  
60

- 1
- 2
- 3
- 4 21. Heesch KC, Garrard J, Sahlqvist S. Incidence, severity and correlates of bicycling injuries in
- 5 a sample of cyclists in Queensland, Australia. *Accid Anal Prev* 2011;43(6):2085–2092
- 6
- 7
- 8 22. Rivara FP, Thompson DC, Thompson RS. Epidemiology of bicycle injuries and risk factors
- 9 for serious injury. *Inj Prev* 1997;3(2):110–114
- 10
- 11
- 12 23. Allen-Munley C, Daniel J, Dhar S. Logistic model for rating urban bicycle route safety.
- 13 *Transp Res Rec* 2004;1878(-1):107–115
- 14
- 15
- 16
- 17 24. Klop J, Khattak A. Factors influencing bicycle crash severity on two-lane, undivided
- 18 roadways in North Carolina. *Transp Res Rec* 1999;1674(-1):78–85
- 19
- 20
- 21 25. De Rome L, Boufous S, Georgeson T, *et al.* Bicycle crashes in different riding environments
- 22 in the Australian capital territory. *Traffic Inj Prev* 2014;15(1):81–88
- 23
- 24
- 25
- 26 26. Harris MA, Reynolds CCO, Winters M, *et al.* The Bicyclists' Injuries and the Cycling
- 27 Environment study: a protocol to tackle methodological issues facing studies of bicycling
- 28 safety. *Inj Prev* 2011.
- 29
- 30
- 31
- 32
- 33 27. Bullard MJ, Under B, Spence J, *et al.* Revisions to the Canadian Emergency department
- 34 Triage and Acuity Scale (CTAS) adult guidelines. *CJEM* 2008;10:136-142
- 35
- 36
- 37 28. Christ M, Grossman F, Winter D, *et al.* Modern triage in the emergency department. *Dtsch*
- 38 *Arztebl Int* 2010;107:892-898
- 39
- 40
- 41
- 42 29. Kim J-K, Kim S, Ulfarsson GF, *et al.* Bicyclist injury severities in bicycle-motor vehicle
- 43 accidents. *Accid Anal Prev* 2007;39(2):238–251
- 44
- 45
- 46
- 47 30. Lustenberger T, Inaba K, Talving P, *et al.* Bicyclists injured by automobiles: relationship of
- 48 age to injury type and severity--a national trauma databank analysis. *J Trauma*
- 49 2010;69(5):1120–1125
- 50
- 51
- 52
- 53
- 54
- 55
- 56
- 57
- 58
- 59
- 60



- 1  
2  
3  
4  
5  
6  
7  
8  
9  
10  
11  
12  
13  
14  
15  
16  
17  
18  
19  
20  
21  
22  
23  
24  
25  
26  
27  
28  
29  
30  
31  
32  
33  
34  
35  
36  
37  
38  
39  
40  
41  
42  
43  
44  
45  
46  
47  
48  
49  
50  
51  
52  
53  
54  
55  
56  
57  
58  
59  
60
31. Moore DN, Schneider WH, Savolainen PT, *et al.* Mixed logit analysis of bicyclist injury severity resulting from motor vehicle crashes at intersection and non-intersection locations. *Accid Anal Prev* 2011;43(3):621–630
  32. Rifaat SM, Tay R, de Barros A. Effect of street pattern on the severity of crashes involving vulnerable road users. *Accid Anal Prev* 2011;43(1):276–283
  33. Yan X, Ma M, Huang H, *et al.* Motor vehicle–bicycle crashes in Beijing: Irregular maneuvers, crash patterns, and injury severity. *Accid Anal Prev* 2011;43(5):1751–1758
  34. Begg DJ, Langley JD, Stephenson S. Identifying factors that predict persistent driving after drinking, unsafe driving after drinking, and driving after using cannabis among young adults. *Accid Anal Prev* 2003;35(5):669–675
  35. Nieves JW, Formica C, Ruffing J, *et al.* Males have larger skeletal size and bone mass than females, despite comparable body size. *J Bone Miner Res* 2005;20(3):529–535
  36. Wu C, Yao L, Zhang K. The red-light running behavior of electric bike riders and cyclists at urban intersections in China: an observational study. *Accid Anal Prev* 2012;49:186–192
  37. Bambach MR, Mitchell RJ, Grzebieta RH, *et al.* The effectiveness of helmets in bicycle collisions with motor vehicles: A case-control study. *Accid Anal Prev* 2013;53:78–88
  38. Teschke K, Frendo T, Shen H, *et al.* Do bicycling crash circumstances vary by route type? A cross-sectional study. *BMC Public Health* 2014, submitted
  39. Slaughter DR, Williams N, Wall SP, *et al.* A community traffic safety analysis of pedestrian and bicyclist injuries based on the catchment area of a trauma center. *J Trauma Acute Care Surg* 2014;76(4):1103–1110
  40. Elvik R. Publication bias and time-trend bias in meta-analysis of bicycle helmet efficacy: A re-analysis of Attewell, Glase and McFadden, 2001. *Accid Anal Prev* 2011;43(3):1245–1251

- 1  
2  
3 41. Thompson DC, Rivara FP, Thompson RS. Effectiveness of bicycle safety helmets in  
4 preventing head injuries. A case-control study. *JAMA* 1996;276(24):1968–1973  
5  
6  
7 42. Cripton PA, Dressler DM, Stuart CA, *et al.* Bicycle helmets are highly effective at preventing  
8 head injury during head impact: Head-form accelerations and injury criteria for helmeted and  
9 unhelmeted impacts. *Accid Anal Prev* 2014;70:1–7  
10  
11  
12 43. Mutrie D, Bailey SK, Malik S. Individual emergency physician admission rates: predictably  
13 unpredictable. *CJEM* 2009;11:149-155  
14  
15  
16 44. Lang J, Dallow N, Lang A, *et al.* Inclusion of minor trauma cases provides a better estimate  
17 of the total burden of injury: Queensland Trauma Registry provides a unique perspective.  
18  
19  
20  
21  
22  
23  
24  
25  
26  
27  
28  
29  
30  
31  
32  
33  
34  
35  
36  
37  
38  
39  
40  
41  
42  
43  
44  
45  
46  
47  
48  
49  
50  
51  
52  
53  
54  
55  
56  
57  
58  
59  
60

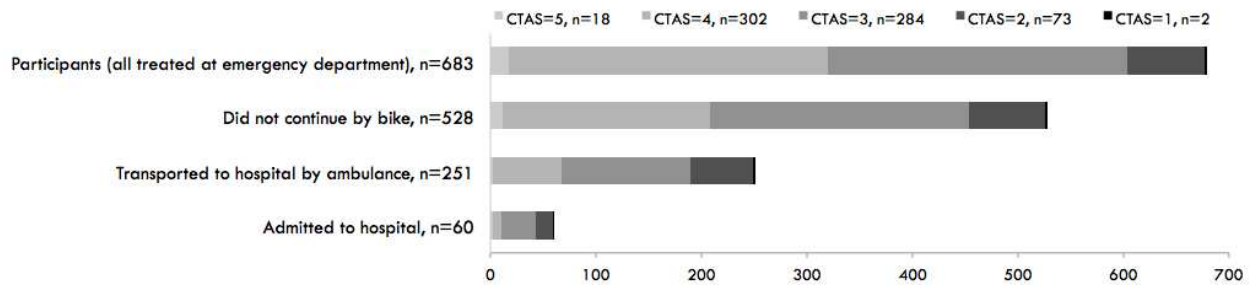

**Figure 1.** Metrics of severity of cycling injuries to 683 study participants, stratified by CTAS. CTAS = Canadian Triage and Acuity Scale, where 5 is the least medically urgent and 1 is the most.

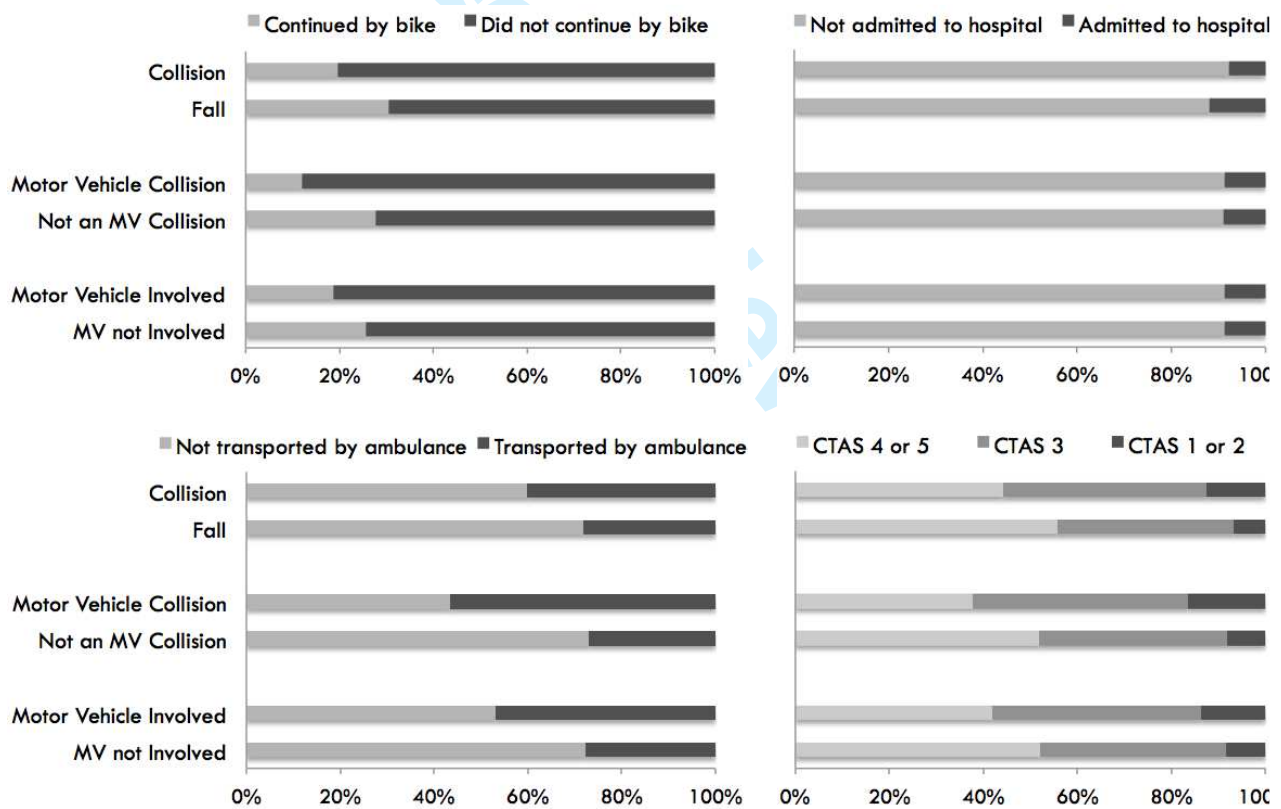

**Figure 2.** Crash circumstances vs. metrics of severity. Collisions could be with a motor vehicle, obstacle, surface feature, cyclist, pedestrian, or animal. Motor vehicle “involved” includes both direct collisions with vehicles and crashes resulting from manoeuvres to avoid a motor vehicle.

# BMJ Open

## Severity of urban cycling injuries in two Canadian cities and their relationship with personal, trip, route and crash characteristics: Case-control analyses using four severity metrics

|                                 |                                                                                                                                                                                                                                                                                                                                                                                                                                                                                                                                                                                                                                                                                                                                                                                                                                                                |
|---------------------------------|----------------------------------------------------------------------------------------------------------------------------------------------------------------------------------------------------------------------------------------------------------------------------------------------------------------------------------------------------------------------------------------------------------------------------------------------------------------------------------------------------------------------------------------------------------------------------------------------------------------------------------------------------------------------------------------------------------------------------------------------------------------------------------------------------------------------------------------------------------------|
| Journal:                        | <i>BMJ Open</i>                                                                                                                                                                                                                                                                                                                                                                                                                                                                                                                                                                                                                                                                                                                                                                                                                                                |
| Manuscript ID:                  | bmjopen-2014-006654.R1                                                                                                                                                                                                                                                                                                                                                                                                                                                                                                                                                                                                                                                                                                                                                                                                                                         |
| Article Type:                   | Research                                                                                                                                                                                                                                                                                                                                                                                                                                                                                                                                                                                                                                                                                                                                                                                                                                                       |
| Date Submitted by the Author:   | 16-Oct-2014                                                                                                                                                                                                                                                                                                                                                                                                                                                                                                                                                                                                                                                                                                                                                                                                                                                    |
| Complete List of Authors:       | Cripton, Peter; University of British Columbia, Mechanical Engineering<br>Shen, Hui; University of British Columbia, School of Population and Public Health<br>Brubacher, Jeffrey; University of British Columbia, Emergency Medicine<br>Chipman, Mary; University of Toronto, Dalla Lana School of Public Health<br>Friedman, Steven; University Health Network,<br>Harris, Anne; Ryerson University, School of Occupational and Public Health<br>Winters, Meghan; Simon Fraser University, Faculty of Health Sciences<br>Reynolds, Conor; University of British Columbia, Institute for Resources, Environment and Sustainability<br>Cusimano, Michael; St. Michael's Hospital, University of Toronto,<br>Babul, Shelina; University of British Columbia, Pediatrics<br>Teschke, Kay; University of British Columbia, School of Population and Public Health |
| <b>Primary Subject Heading</b>: | Emergency medicine                                                                                                                                                                                                                                                                                                                                                                                                                                                                                                                                                                                                                                                                                                                                                                                                                                             |
| Secondary Subject Heading:      | Sports and exercise medicine                                                                                                                                                                                                                                                                                                                                                                                                                                                                                                                                                                                                                                                                                                                                                                                                                                   |
| Keywords:                       | EPIDEMIOLOGY, ACCIDENT & EMERGENCY MEDICINE, PUBLIC HEALTH                                                                                                                                                                                                                                                                                                                                                                                                                                                                                                                                                                                                                                                                                                                                                                                                     |
|                                 |                                                                                                                                                                                                                                                                                                                                                                                                                                                                                                                                                                                                                                                                                                                                                                                                                                                                |

SCHOLARONE™  
Manuscripts

1  
2  
3  
4 **Severity of urban cycling injuries in two Canadian cities and their relationship with personal,**  
5 **trip, route and crash characteristics: Case-control analyses using four severity metrics**  
6  
7  
8  
9

10  
11  
12 Peter A. Cripton<sup>1</sup>, Hui Shen<sup>2</sup>, Jeff R. Brubacher<sup>3</sup>, Mary Chipman<sup>4</sup>, Steven M. Friedman<sup>5,6</sup>, M. Anne  
13  
14 Harris<sup>7</sup>, Meghan Winters<sup>8</sup>, Conor C.O. Reynolds<sup>9</sup>, Michael D. Cusimano<sup>10,11</sup>, Shelina Babul<sup>12</sup>, Kay  
15  
16 Teschke<sup>2,\*</sup>  
17  
18

19  
20 \* Corresponding author

21  
22 School of Population and Public Health, University of British Columbia, 2206 East Mall,  
23  
24 Vancouver, BC, Canada, V6T 1Z3

25  
26 [kay.teschke@ubc.ca](mailto:kay.teschke@ubc.ca)

27  
28  
29 604 822-2041  
30  
31  
32

33  
34 <sup>1</sup>Department of Mechanical Engineering, University of British Columbia, Vancouver, Canada  
35

36  
37 <sup>2</sup>School of Population and Public Health, University of British Columbia, Vancouver, Canada  
38

39  
40 <sup>3</sup>Department of Emergency Medicine, University of British Columbia, Vancouver, Canada  
41

42  
43 <sup>4</sup>Dalla Lana School of Public Health, University of Toronto, Toronto, Canada  
44

45  
46 <sup>5</sup>Faculty of Medicine, University of Toronto, Toronto, Canada  
47

48  
49 <sup>6</sup>University Health Network, Toronto, Canada  
50

51  
52 <sup>7</sup>School of Occupational and Public Health, Ryerson University, Toronto, Canada  
53  
54

55  
56 <sup>8</sup>Faculty of Health Sciences, Simon Fraser University, Burnaby, Canada  
57  
58  
59  
60

1  
2  
3  
4  
5  
6  
7  
8  
9  
10  
11  
12  
13  
14  
15  
16  
17  
18  
19  
20  
21  
22  
23  
24  
25  
26  
27  
28  
29  
30  
31  
32  
33  
34  
35  
36  
37  
38  
39  
40  
41  
42  
43  
44  
45  
46  
47  
48  
49  
50  
51  
52  
53  
54  
55  
56  
57  
58  
59  
60

<sup>9</sup>Institute for Resources, Environment and Sustainability, University of British Columbia,  
Vancouver, Canada

<sup>10</sup>Division of Neurosurgery and Injury Prevention Research Office, Keenan Research Centre, St.  
Michael's Hospital, Toronto, Canada

<sup>11</sup>Departments of Surgery and Education and Public Health, University of Toronto, Toronto,  
Canada

<sup>12</sup>Department of Pediatrics, University of British Columbia, Vancouver, Canada

Abstract word count: 291

Article word count: 4040 (excluding acknowledgements)

Key words: Bicycle; injury severity; bike lanes; epidemiology

## ABSTRACT

**Objective:** To examine the relationship between cycling injury severity and personal, trip, route and crash characteristics.

**Methods:** Data from the Bicyclists' Injuries and the Cycling Environment Study conducted in Toronto and Vancouver, Canada, were used to classify injury severity using four metrics: 1) did not continue trip by bike; 2) transported to hospital by ambulance; 3) admitted to hospital; and 4) Canadian Triage and Acuity Scale (CTAS). Multiple logistic regression was used to examine associations with personal, trip, route and crash characteristics.

**Results:** Of 683 adults injured while cycling, 528 did not continue their trip by bike, 251 were transported by ambulance, and 60 were admitted to hospital for further treatment. Treatment urgencies included 75 as CTAS=1 or 2 (most medically urgent), 284 as CTAS=3, and 320 as CTAS=4 or 5 (least medically urgent). Older age and collision with a motor vehicle were each significantly associated with increased severity in three metrics (both variables with ambulance transport and CTAS; age with hospital admission; and motor vehicle collision with did not continue by bike). Factors significantly associated with more severe injuries in one metric included more frequent cycling (medically urgent); female sex and crashes at non-intersection locations (did not continue by bike), on multi-use paths or local streets (admitted to hospital) and on sidewalks, downhill grades, and sites with higher motor vehicle speeds (ambulance transport).

**Conclusions:** In two of Canada's largest cities, about one-third of the bicycle crashes were collisions with motor vehicles and the resulting injuries were more severe than in other crash circumstances, underscoring the importance of separating cyclists from motor vehicle traffic. Our results also

1  
2  
3 suggest that facilities that are not designed with pedestrians in mind and that minimize slopes would  
4  
5 reduce both bicycling injury severity and crash risk.  
6  
7  
8  
9

### 10 11 **Strengths and Limitations of this Study** 12

- 13  
14  
15  
16 • This study is one of few to examine the relationship between route characteristics and  
17 severity of bicycling injuries. Its major strength was use of data from a study of bicycling  
18 injury crash risk. This made it possible to consider whether route characteristics that  
19 increased crash risk were similar to or different from those that increased bicycling injury  
20 severity.  
21  
22
- 23 • The results show that bike facilities that separate cyclists from motor vehicle traffic, that are  
24 not designed for pedestrians, and that minimize slopes would reduce both injury severity  
25 after a crash and reduce crash risk.  
26  
27
- 28 • The analyses examined four metrics covering different aspects of injury severity (not able to  
29 continue the trip by bike, transport to hospital by ambulance, admission to hospital, and  
30 treatment urgency) and identified factors that were consistently associated with increased  
31 risk: increased age and collision with a motor vehicle.  
32  
33
- 34 • The study included a range of injury severities resulting in emergency treatment at a hospital  
35 but did not include those so severely injured they could not remember their trip, nor those  
36 with such minor injuries that emergency treatment was not required.  
37  
38
- 39 • The influence of route characteristics on severity was adjusted for potential confounding by  
40 personal and trip characteristics in the regression models, but the potential for uncontrolled  
41 confounding by unmeasured characteristics remains.  
42  
43  
44  
45  
46  
47  
48  
49  
50  
51  
52  
53  
54  
55  
56  
57  
58  
59  
60



## INTRODUCTION

Cycling is used for transportation and is a popular recreational activity. Its health benefits are clear, [1,2] in contrast to motor vehicle travel. Transportation cycling has risks in the same order of magnitude as driving and walking in the US and Canada.[3,4] However it is not nearly as safe as in some European countries where cycling participation is much higher.[5-8]

In 2010, there were 618 cyclist traffic deaths in the United States and 60 in Canada.[9,10] Broader data (including bicycling sports such as mountain biking) indicate that about 27,800 Americans and 4,300 Canadians were hospitalized for cycling injuries in 2009.[11,12] Although bicycling injuries are a small proportion of all traffic injuries and deaths in North America (~2 to 4%),[9,10] reducing their incidence is important because of the direct harm that they do and because they deter potential cyclists.[13-15]

The reason postulated for the inversion of cycling activity and injury risk between North America and Europe is the well-designed bicycle-specific infrastructure in Europe *vs.* its relative paucity in North America. We reviewed published studies and found that bicycle-specific infrastructure was associated with decreased injury risk, but a small range of infrastructure had been studied, often with uncertain control of exposure to risk.[16] We subsequently conducted a case-crossover study of the association between route infrastructure and crash risk: the Bicyclists' Injuries and the Cycling Environment Study.[17,18] It found that infrastructure that was bicycle-specific (e.g., cycle tracks separated from traffic, bike lanes) or "bicycle-friendly" (e.g., local streets with traffic diversion) had considerably lower injury risk. Other features were found to increase risk: streetcar or train tracks, downhill grades, construction, major street intersections, and traffic circles at local street intersections. This work was designed to estimate associations with injury risk, with a no-injury control.

1  
2  
3 An alternative line of inquiry is what factors are associated with injury severity, among those who  
4 have been injured. Many studies have found that collisions with motor vehicles increase cyclist injury  
5 severity.[11,19-22] However few authors have examined severity with respect to route  
6  
7  
8 infrastructure.[23-25] Higher severity has been found with grades, higher speed roads, and crashes in  
9  
10 traffic or on shared paths.[23-25] Although these results suggest that predictors of cycling injury risk  
11  
12 may be similar to predictors of injury severity, this is not established, and our study offers the  
13  
14 opportunity to examine both sets of outcomes, adding a level of context for policy makers,  
15  
16 infrastructure designers and other stakeholders. In our opinion, injury severity, not just the fact of  
17  
18 an injury, is a second and equally important criterion used by the lay public to evaluate the apparent  
19  
20 safety of cycling.  
21  
22  
23  
24  
25  
26

27 Therefore we conducted additional analyses of data from the Bicyclists' Injuries and the Cycling  
28  
29 Environment Study to examine the relationship between injury severity and personal, trip, route and  
30  
31 crash characteristics.  
32  
33  
34  
35  
36

## 37 **METHODS**

38  
39  
40 Methods of study conduct and reliability testing have been described in detail elsewhere.[17,26] The  
41  
42 study population consisted of adult ( $\geq 19$  years) residents of Toronto and Vancouver who were  
43  
44 injured while riding a bicycle in the city and treated within 24 hours in the emergency departments  
45  
46 of the following hospitals between May 18, 2008 and November 30, 2009: St. Paul's or Vancouver  
47  
48 General in Vancouver; St. Michael's, Toronto General or Toronto Western in Toronto. Those who  
49  
50 were fatally injured or so severely injured that they were unable to remember their trip were not  
51  
52 included.  
53  
54  
55  
56  
57  
58  
59  
60

1  
2  
3 Data on characteristics related to severity were abstracted from emergency department records. In  
4  
5 addition, eligible participants were interviewed in person by trained interviewers about personal  
6  
7 characteristics, trip characteristics, and crash circumstances, using a structured questionnaire  
8  
9  
10 (<http://cyclingingcities.spph.ubc.ca/files/2011/10/InterviewFormFinal.pdf>).  
11

12  
13 The study was not designed to focus on severity, so the data did not include classical severity scoring  
14  
15 using the Abbreviated Injury Scale. However we did have access to four other indicators of severity:  
16

- 17  
18 1. Whether the subject continued their trip by bicycle (self-reported in the interview), no vs. yes
- 19  
20 2. Whether the subject was transported by ambulance (hospital data), yes vs. no
- 21  
22 3. Whether the subject was admitted to hospital (hospital data), yes vs. no
- 23  
24 4. Canadian Triage and Acuity Scale (CTAS) (hospital data), levels 1 to 5, defined as  
25  
26 follows:[27,28]

- 27  
28  
29 • 1 – Resuscitation; need to be seen immediately
- 30  
31 • 2 – Emergent; need to be seen within 15 minutes
- 32  
33 • 3 – Urgent; need to be seen within 30 minutes
- 34  
35 • 4 – Less urgent; need to be seen within 60 minutes
- 36  
37 • 5 – Non urgent, need to be seen within 120 minutes
- 38  
39  
40  
41

42  
43 The relationship between these severity metrics was examined descriptively using cross-tabulations  
44  
45 and Pearson correlation coefficients.

46  
47 Site observations were made to document characteristics of crash and control sites, and allow route  
48  
49 infrastructure classification.[17,18] The observations were made blind to whether an injury took  
50  
51 place at the site or not. In the current analyses, only the crash site data was used.  
52  
53

54  
55 Unconditional logistic regression was used to examine associations of each of the following  
56  
57 independent variables with each severity outcome metric:  
58  
59  
60

- personal characteristics: sex; age; how frequently he/she cycled; whether the cyclist considered himself/herself experienced, had taken a cycling training course, had a driver's license
- trip characteristics: time of day; weather; helmet use; use of visible clothing on the trunk; whether bike lights were turned on; alcohol and drug use in the 6 hours prior
- route characteristics at the injury crash site: type of route; intersection location; presence of bike signage; junctions; construction; streetcar tracks; grade; average vehicle speed; distance visible along route.
- crash circumstances: collision (with a motor vehicle, obstacle, surface feature, cyclist, pedestrian, or animal) vs. fall; collision with a motor vehicle vs. not; motor vehicle "involvement" (i.e., both direct collisions with vehicles and crashes resulting from motor vehicle avoidance manoeuvres) vs. not. No data on fault in the crash was collected.

All independent variables significant at  $p < 0.05$  in simple logistic regression (unadjusted analysis) of any severity metric were included in multiple regression models for all four severity metrics. The rationale for this broad inclusion of variables in the final models was to maximize control of potential confounding by personal and trip characteristics, to allow comparison of results across severity metrics, and to ensure that characteristics previously shown to be consistently related to injury severity were included in all the models (i.e., age, crash circumstance).

For dichotomous severity metrics (did not continue by bike, ambulance transport, hospital admission), traditional logistic regression was used, with the more severe injury category treated as the outcome ("case") group and the less severe as the comparison ("control") group. For CTAS, ordinal logistic regression modeled the odds of a more urgent CTAS group, after verifying that the proportional odds assumption was valid. CTAS categories were grouped as follows: most urgent, levels 1 or 2; moderate urgency, 3; least urgency, 4 or 5.

1  
2  
3 Additional analyses were conducted to evaluate the models. Analyses were run without the motor  
4 vehicle collision variable and, separately, without the route type variable to determine whether either  
5  
6 vehicle collision variable and, separately, without the route type variable to determine whether either  
7  
8 changed the relationship of the other to severity in the full models. Separate analyses were conducted  
9  
10 for motor vehicle collisions and other collisions to determine whether there was interaction between  
11  
12 the motor vehicle collision and route type variables.  
13

## 14 15 16 17 18 **RESULTS** 19

20  
21 The study included 690 injured cyclists (414 in Vancouver, 276 in Toronto). Seven were unable to  
22  
23 recall their crash circumstances, so were removed from analyses; none of these continued by bike,  
24  
25 six were transported by ambulance, their CTAS scores were either 1 or 2, and one was admitted to  
26  
27 hospital. After these subjects were excluded, 683 subjects remained for most analyses, though four  
28  
29 additional subjects did not have information on CTAS or ambulance transport.  
30  
31

32  
33 Descriptive data about the study participants, the trips when their injuries occurred, the  
34  
35 characteristics of the route at the crash site, and the crash circumstances are presented in Table 1.  
36  
37 Most participants were men, young, and regular cyclists. Most wore a helmet, but few wore bright  
38  
39 clothing or used bike lights. Most of the injury sites were on major or local streets with little or no  
40  
41 cycling infrastructure and most were at non-intersection locations. A minority of injuries occurred at  
42  
43 sites with bike-specific infrastructure.  
44  
45

46  
47 Most of the crashes were collisions (74%, n=506) rather than falls. Direct collisions with motor  
48  
49 vehicles (34%, n=231) were the most frequent collision type. Crashes “involving” motor vehicles  
50  
51 (48%, n=330) included direct collisions, as well as crashes to avoid motor vehicle collisions (14%,  
52  
53 n=99). Few collisions involved other cyclists (3%, n=22), pedestrians (2%, n=12) or animals (1%,  
54  
55 n=6).  
56  
57  
58  
59  
60

**Table 1.** Personal characteristics of the cyclists, characteristics of the trip when the injury occurred, characteristics of the route at the site where the crash occurred, and crash circumstances (N=683)

|                                                                                                                                                 | N (%)     |
|-------------------------------------------------------------------------------------------------------------------------------------------------|-----------|
| Personal characteristics                                                                                                                        |           |
| Male                                                                                                                                            | 404 (59%) |
| Age                                                                                                                                             |           |
| 19 to 29                                                                                                                                        | 262 (39%) |
| 30 to 39                                                                                                                                        | 167 (25%) |
| 40 to 49                                                                                                                                        | 115 (17%) |
| 50 to 59                                                                                                                                        | 81 (12%)  |
| ≥ 60                                                                                                                                            | 55 (8.1%) |
| Regular cyclist (cycled ≥ 52 times per year)                                                                                                    | 602 (88%) |
| Had a driver's license                                                                                                                          | 613 (90%) |
| Considered themselves experienced                                                                                                               | 637 (93%) |
| Had taken a cycling training course                                                                                                             | 42 (6.1%) |
| Trip characteristics                                                                                                                            |           |
| Time of day                                                                                                                                     |           |
| Day                                                                                                                                             | 530 (78%) |
| Dawn or dusk                                                                                                                                    | 50 (7.3%) |
| Night                                                                                                                                           | 103 (15%) |
| Clear weather                                                                                                                                   | 473 (69%) |
| Helmet worn                                                                                                                                     | 472 (69%) |
| Bright clothing worn                                                                                                                            | 228 (33%) |
| Bike lights turned on                                                                                                                           | 133 (19%) |
| Alcohol consumed in previous 6 h                                                                                                                | 70 (10%)  |
| Drugs consumed in previous 6 h                                                                                                                  | 78 (11%)  |
| Route characteristics at the injury sites                                                                                                       |           |
| Route types                                                                                                                                     |           |
| Major streets (arterials and collectors, most with no bicycle infrastructure, a few with shared lanes, n=22)                                    | 289 (42%) |
| Local streets (mainly residential, many designated as bikeways, n=99)                                                                           | 187 (27%) |
| Sidewalks                                                                                                                                       | 52 (7.6%) |
| Multi-use paths (designated for pedestrian and bicyclists)                                                                                      | 73 (11%)  |
| Bicycle-specific infrastructure (bike lanes on major streets, n=59; cycle tracks alongside major streets, n=2; and off-street bike paths, n=21) | 82 (12%)  |
| At an intersection                                                                                                                              |           |
| Junctions in last 100 m                                                                                                                         | 211 (31%) |
| Bike signage present                                                                                                                            | 593 (87%) |
| Bike signage present                                                                                                                            | 76 (11%)  |
| Construction present                                                                                                                            | 85 (12%)  |
| Streetcar or train tracks present                                                                                                               | 149 (22%) |
| Downhill grade                                                                                                                                  | 329 (48%) |
| Average vehicle speed > 30 km/h                                                                                                                 | 363 (53%) |
| Forward distance visible < 20 m                                                                                                                 | 12 (1.8%) |
| Crash circumstances                                                                                                                             |           |
| Collision with motor vehicle                                                                                                                    | 231 (34%) |
| Collision with streetcar or train tracks                                                                                                        | 97 (14%)  |
| Collision with other surface features (e.g., pothole, rock, roots, leaves, ice)                                                                 | 69 (10%)  |
| Collision with obstacle (e.g., post, curb, planter, lane divider)                                                                               | 69 (10%)  |
| Collision with cyclist, pedestrian, animal                                                                                                      | 40 (5.9%) |
| Falls                                                                                                                                           | 177 (26%) |

Figure 1 shows the distribution of subjects by the severity metrics, stratified by CTAS. The most urgent CTAS scores (1 or 2, n=75) were assigned to 11% of all subjects, 14% of those who did not continue by bike, 25% of those transported by ambulance and 28% of those who were admitted to

hospital. Table 2 provides additional detail on the relationship between the metrics. Of the 251 subjects transported to hospital by ambulance, 99% did not continue by bike. Of the 60 subjects admitted to hospital, 100% did not continue by bike, and 75% were transported by ambulance. Pearson correlations show associations in the expected directions, but the correlations were not strong. Thus the four metrics had logical relationships to each other, but did not measure identical constructs.

**Table 2.** Relationship between the four metrics of severity: Pearson correlation coefficients above the diagonal; numbers of subjects below the diagonal.

|                                              | Did not<br>continue<br>by bike | Transported<br>to hospital by<br>ambulance | Admitted to<br>hospital | CTAS* |
|----------------------------------------------|--------------------------------|--------------------------------------------|-------------------------|-------|
| Did not continue by bike (n=528)             | –                              | 0.40                                       | 0.17                    | -0.29 |
| Transported to hospital by ambulance (n=251) | 249                            | –                                          | 0.24                    | -0.39 |
| Admitted to hospital (n=60)                  | 60                             | 45                                         | –                       | -0.20 |
| CTAS = 1 or 2 (n=75)                         | 74                             | 62                                         | 17                      | –     |

\* Correlations with CTAS were negative because the scale was in the opposite direction, with 1 = most urgent and 5 = least urgent. All other metrics were assigned 1 = more vs. 0 = less severe.

Figure 2 shows the severity metrics against crash circumstances, classified three ways. Collisions tended to be more severe than falls, and crashes “involving” motor vehicles tended to be more severe than those not. Direct collisions with motor vehicles had the highest proportion in the more severe category of every metric except admitted to hospital. In unadjusted analyses, collision (of any type) and motor vehicle “involvement” both had elevated odds ratios for the same severity metrics as motor vehicle collision (data not shown), but the odds ratios were lower, indicating that it was direct collision with a motor vehicle that led to increased severity. Only the motor vehicle collision variable was included in multiple regression models.

Table 3 shows the results of the multiple logistic regression models for each severity metric, including all independent variables statistically significant in at least one unadjusted analysis. Four personal characteristic variables were included: age, sex, cycling experience, and cycling frequency.

1  
2  
3 Age showed consistent associations across all severity metrics; older age groups had more severe  
4 injuries, significantly so for ambulance transport, admission to hospital and CTAS. Women were  
5 significantly more likely to stop their trip by bike than men. There was a tendency for more  
6  
7 experienced and more regular cyclists to have higher injury severity, though only one association was  
8 statistically significant in multiple regression.  
9  
10  
11  
12  
13

14  
15 Cyclists whose crash was a direct collision with a motor vehicle had elevated odds ratios for all  
16 severity metrics, statistically significant for not continuing by bike, being transported by ambulance  
17 and more urgent triage score (CTAS). Those whose crash sites were on multi-use paths, sidewalks  
18 and local streets tended to have more severe injuries than those who crashed on major streets;  
19 significant associations were observed for certain associations with ambulance transport and hospital  
20 admission. Crashes at intersections had inconsistent results; the only significant odds ratio indicated  
21 that those injured at an intersection were less likely to stop their trip by bike. Downhill grades were  
22 consistently related to greater injury severity, significantly so for transportation by ambulance. The  
23 same pattern was observed for higher average motor vehicle speeds at the crash location. Time of  
24 day and presence of streetcar tracks were both significant in some unadjusted analyses, but did not  
25 remain so in multiple regression.  
26  
27  
28  
29  
30  
31  
32  
33  
34  
35  
36  
37  
38  
39  
40

41 The following independent variables were not associated with any of the injury severity metrics in  
42 unadjusted analyses and were not included in multiple regression: whether the participant had taken  
43 a cycling training course or had a driver's license; weather; use of a helmet, visible clothing on the  
44 trunk, or bike lights; alcohol or drug use in the 6 hours prior to the trip; presence of bike signage,  
45  
46 junctions, or construction; and distance visible along the route.  
47  
48  
49  
50  
51  
52  
53  
54  
55  
56  
57  
58  
59  
60



**Table 3.** Odds ratios (OR) and 95% confidence intervals (CI) for associations between metrics of injury severity and personal, trip, crash circumstance, and route characteristics (N=683). Multiple logistic regression models; all independent variables significant in at least one unadjusted analysis included.

|                                                         | Did not continue<br>by bike<br>N=528 (77%)<br>OR (95% CI) | Transported to<br>hospital by<br>ambulance<br>N=251 (37%)<br>OR (95% CI) | Admitted to<br>hospital<br>N=60 (8.8%)<br>OR (95% CI) | CTAS †<br>1 or 2, N=75 (11%)<br>3, N=284 (42%)<br>4 or 5, N=320 (47%)<br>OR (95% CI) |
|---------------------------------------------------------|-----------------------------------------------------------|--------------------------------------------------------------------------|-------------------------------------------------------|--------------------------------------------------------------------------------------|
| <b>Sex</b>                                              |                                                           |                                                                          |                                                       |                                                                                      |
| Male                                                    | 1 (reference)                                             | 1 (reference)                                                            | 1 (reference)                                         | 1 (reference)                                                                        |
| Female                                                  | <b>1.91 (1.26 – 2.92)</b>                                 | 1.34 (0.93 – 1.93)                                                       | 1.07 (0.59 – 1.94)                                    | 0.98 (0.71 – 1.35)                                                                   |
| <b>Age</b>                                              |                                                           |                                                                          |                                                       |                                                                                      |
| 19 to 29                                                | 1 (reference)                                             | 1 (reference)                                                            | 1 (reference)                                         | 1 (reference)                                                                        |
| 30 to 39                                                | 1.15 (0.70 – 1.88)                                        | 1.18 (0.75 – 1.85)                                                       | 1.18 (0.54 – 2.61)                                    | 1.29 (0.87 – 1.91)                                                                   |
| 40 to 49                                                | 1.22 (0.70 – 2.14)                                        | 1.40 (0.83 – 2.34)                                                       | 1.96 (0.89 – 4.33)                                    | <b>2.07 (1.33 – 3.23)</b>                                                            |
| 50 to 59                                                | 1.50 (0.77 – 2.95)                                        | 1.04 (0.57 – 1.91)                                                       | 1.02 (0.35 – 2.97)                                    | 1.57 (0.95 – 2.62)                                                                   |
| ≥ 60                                                    | 1.33 (0.63 – 2.82)                                        | <b>2.57 (1.31 – 5.05)</b>                                                | <b>3.52 (1.37 – 9.04)</b>                             | 1.42 (0.78 – 2.60)                                                                   |
| <b>Considered themselves<br/>an experienced cyclist</b> |                                                           |                                                                          |                                                       |                                                                                      |
| No                                                      | 1 (reference)                                             | 1 (reference)                                                            | 1 (reference)                                         | 1 (reference)                                                                        |
| Yes                                                     | 1.36 (0.63 – 2.95)                                        | 2.16 (0.97 – 4.83)                                                       | 1.03 (0.28 – 3.84)                                    | 1.52 (0.78 – 2.95)                                                                   |
| <b>Cycling frequency °</b>                              |                                                           |                                                                          |                                                       |                                                                                      |
|                                                         | 1.00 (0.78 – 1.76)                                        | 0.92 (0.72 – 1.08)                                                       | 1.18 (0.85 – 1.50)                                    | <b>1.18 (1.00 – 1.38)</b>                                                            |
| <b>Time of day</b>                                      |                                                           |                                                                          |                                                       |                                                                                      |
| Day                                                     | 1 (reference)                                             | 1 (reference)                                                            | 1 (reference)                                         | 1 (reference)                                                                        |
| Dusk or dawn                                            | 0.65 (0.33 – 1.29)                                        | 0.53 (0.24 – 1.13)                                                       | 0.75 (0.21 – 2.62)                                    | 0.72 (0.39 – 1.30)                                                                   |
| Night                                                   | 0.90 (0.53 – 1.54)                                        | 1.16 (0.71 – 1.90)                                                       | 1.87 (0.90 – 3.86)                                    | 0.90 (0.58 – 1.40)                                                                   |
| <b>Motor vehicle collision</b>                          |                                                           |                                                                          |                                                       |                                                                                      |
| No                                                      | 1 (reference)                                             | 1 (reference)                                                            | 1 (reference)                                         | 1 (reference)                                                                        |
| Yes                                                     | <b>3.46 (2.07 – 5.76)</b>                                 | <b>3.66 (2.44 – 5.48)</b>                                                | 1.27 (0.63 – 2.54)                                    | <b>2.03 (1.41 – 2.90)</b>                                                            |
| <b>Route type</b>                                       |                                                           |                                                                          |                                                       |                                                                                      |
| Major street                                            | 1 (reference)                                             | 1 (reference)                                                            | 1 (reference)                                         | 1 (reference)                                                                        |
| Local street                                            | 1.08 (0.61 – 1.92)                                        | 1.44 (0.86 – 2.39)                                                       | <b>2.76 (1.15 – 6.62)</b>                             | 1.18 (0.75 – 1.84)                                                                   |
| Sidewalk                                                | 1.15 (0.42 – 3.19)                                        | <b>3.72 (1.37 – 10.1)</b>                                                | 3.26 (0.51 – 20.7)                                    | 1.31 (0.56 – 3.06)                                                                   |
| Multi-use path                                          | 1.33 (0.52 – 3.44)                                        | 2.18 (0.83 – 5.77)                                                       | <b>7.56 (1.43 – 40.0)</b>                             | 1.22 (0.55 – 2.68)                                                                   |
| Bicycle-specific<br>infrastructure                      | 0.98 (0.50 – 1.94)                                        | 1.02 (0.55 – 1.89)                                                       | 0.89 (0.27 – 2.99)                                    | 1.27 (0.74 – 2.18)                                                                   |
| <b>Intersection</b>                                     |                                                           |                                                                          |                                                       |                                                                                      |
| No                                                      | 1 (reference)                                             | 1 (reference)                                                            | 1 (reference)                                         | 1 (reference)                                                                        |
| Yes                                                     | <b>0.57 (0.36 – 0.88)</b>                                 | 1.44 (0.98 – 2.13)                                                       | 1.04 (0.53 – 2.04)                                    | 0.89 (0.63 – 1.26)                                                                   |
| <b>Streetcar or train tracks</b>                        |                                                           |                                                                          |                                                       |                                                                                      |
| No                                                      | 1 (reference)                                             | 1 (reference)                                                            | 1 (reference)                                         | 1 (reference)                                                                        |
| Yes                                                     | 1.11 (0.65 – 1.91)                                        | 1.03 (0.63 – 1.70)                                                       | 0.98 (0.39 – 2.47)                                    | 1.36 (0.88 – 2.10)                                                                   |
| <b>Grade</b>                                            |                                                           |                                                                          |                                                       |                                                                                      |

|                                               |                    |                           |                    |                    |
|-----------------------------------------------|--------------------|---------------------------|--------------------|--------------------|
| Flat or uphill                                | 1 (reference)      | 1 (reference)             | 1 (reference)      | 1 (reference)      |
| Downhill                                      | 1.32 (0.89 – 1.96) | <b>1.62 (1.14 – 2.32)</b> | 1.23 (0.68 – 2.22) | 1.31 (0.96 – 1.79) |
| <b>Motor vehicle speed <math>\beta</math></b> | 1.05 (0.89 – 1.24) | <b>1.21 (1.01 – 1.43)</b> | 1.24 (0.91 – 1.69) | 1.08 (0.94 – 1.24) |

† CTAS = Canadian Triage and Acuity Scale, grouped into 3 categories for analysis using ordinal logistic regression; the odds ratio represents the comparison of categories 1 & 2 vs. 3, 4 & 5 and categories 1, 2 & 3 vs. 4 & 5 under the proportional odds assumption. The proportional odds assumption was met, meaning that the odds ratios for these two comparisons are equivalent.

° Mean cycling frequency = 152 trips/y, SD = 81 trips/y; Odds ratios and confidence intervals calculated for a one standard deviation increase

$\beta$  Mean motor vehicle speed = 36 km/h, SD = 9.5 km/h; odds ratios and confidence intervals calculated for a one standard deviation increase. This is a mean of means: 683 sites, each with 5 speed measurements taken during the site observation period (~30 minutes), then averaged. Speeds were measured using a Bushnell Velocity Speed Gun (Overland Park, KS).

## DISCUSSION

In this study, using four severity metrics that spanned rider self-evaluation (unable to continue by bike) to clinical-practitioner evaluation (CTAS), we found that the following characteristics were associated with more severe injuries: older age; female sex; more experience and frequency of cycling; collision with a motor vehicle; crash on a multi-use path, sidewalk or local street, at non-intersection location, on a downhill grade, and at locations with higher motor vehicle speeds.

### Personal Characteristics

Older age has frequently been associated with more severe injuries in bicycling crashes.[19-22, 29-33]

We observed the same for all metrics, though the odds ratio was not always statistically significant.

This pattern is attributed to increasing frailty with age and has been observed for all vulnerable road users.[32]

Although sex has frequently been associated with bicycling injury severity, the evidence does not show a clear pattern. We found that women were less likely to continue their trip by bicycle and had a non-significant increased chance of ambulance transport. Moore *et al.* found women to have more severe injuries,[31] but others have found higher severities in men.[19,22,32] Theories for each of these results are available. The smaller average size of women may make them more vulnerable and

1  
2  
3 men may be more comfortable handling minor injuries without help. A greater propensity for risk-  
4 taking and speed may provide opportunities for men to have higher impact crashes.[34-36]  
5  
6

7  
8 We found that experienced cyclists and those who cycled more frequently had greater injury severity  
9 (more likely to need ambulance transport, or to have a more urgent triage score, respectively).  
10

11 Similarly Heesh *et al.* found that frequent and experienced cyclists had more severe injuries.[21]  
12

13 These cyclists may travel at higher speeds and incur higher impact forces in a crash.  
14  
15

### 16 17 18 **Crash Circumstances** 19

20  
21 About a third of the injuries were collisions with motor vehicles. These were strongly associated  
22 with three of our four injury severity metrics. In other research, collisions with motor vehicles have  
23 consistently been associated with increased severity.[11,19-22] Collisions with larger vehicles have  
24 resulted in more severe injuries and fatalities.[29,31,33,37]  
25  
26  
27

28  
29 Previous analyses of our Bicyclists' Injuries and the Cycling Environment study data showed that  
30 collisions with motor vehicles were associated with route type.[38] They never occurred on off-street  
31 bike paths or on cycle tracks (separated bike lanes), and were over-represented on major streets with  
32 parked cars and no bike infrastructure. Therefore, for the severity analyses presented here, we  
33 considered whether route type confounded the association between collision with a motor vehicle  
34 and severity (and vice versa), but this was not the case, nor was there interaction between the two  
35 variables (data not shown).  
36  
37  
38  
39  
40  
41  
42  
43  
44  
45  
46

47 The severity of direct collisions with motor vehicles provides clear rationale for transportation  
48 planners to minimize interactions between cyclists and vehicles. This planning approach is  
49 supported by the results of our earlier analyses of injury crash risk: cycle tracks (bike lanes that  
50 physically separate cyclists and motor vehicle traffic) were associated with 1/9<sup>th</sup> the risk compared to  
51 streets with no bicycle infrastructure.[17] Separating modes of traffic with large differences in speed  
52  
53  
54  
55  
56  
57  
58  
59  
60

1  
2  
3 and mass is a principle used by countries such as Sweden, Germany, Denmark and the Netherlands  
4  
5 where bicycling injury risk is much lower than in North America.[6,8] A rationale for this approach  
6  
7 is that human error is inevitable, so it is important to minimize the consequences of such errors.  
8  
9 Bicycling facilities separated from motor vehicles minimize the likelihood of a collision and the  
10  
11 potential for severe injury when either a driver or a cyclist makes an error.  
12  
13

### 14 15 **Route Characteristics** 16

17  
18 Our main interest in this analysis was to determine whether route characteristics were associated  
19  
20 with increased or reduced injury severity. Route type, presence of an intersection, grade, and average  
21  
22 motor vehicle speed at the crash location were all associated with injury severity.  
23  
24

25  
26 In comparison to crashes on major streets without cycling infrastructure, crashes on sidewalks and  
27  
28 multi-use paths had considerably higher odds of ambulance transport (odds ratio for multi-use paths  
29  
30 not significant). Crashes on sidewalks and multi-use paths also had considerably higher odds of  
31  
32 hospital admission (odds ratio for sidewalks not significant). In our earlier analyses of crash risk,  
33  
34 multi-use paths and sidewalks had among the highest risks, despite being off-street.[17,18] The  
35  
36 increased severity after a crash adds to concern about these route types. Local streets (mainly  
37  
38 residential streets) were found to be a safe route type in our earlier analyses, with only about half the  
39  
40 risk of a crash.[17] The current analysis indicates that if a crash did occur, there was an increased  
41  
42 odds of one severity measure – hospitalization.  
43  
44  
45

46  
47 Few studies have examined route type and injury severity. De Rome *et al.* found that more severe  
48  
49 injuries were associated with crashes in traffic and on multi-use paths, and less severe with crashes in  
50  
51 bike lanes and on sidewalks.[25] Slaughter *et al.* found lower severity in bike lane crashes.[39] In  
52  
53 earlier analyses of our study, bicycle-specific infrastructure was found to have lower crash risk than  
54  
55 major streets without such infrastructure,[17] but the current analysis indicates that if a crash did  
56  
57  
58  
59  
60

1  
2  
3 occur, injury severity was similar. This may in part be because most of the injury sites with bicycle-  
4  
5 specific infrastructure in our study were bike lanes without physical separation from motor vehicles.  
6  
7

8 Intersection vs. non-intersection crash locations did not present a clear pattern of association with  
9  
10 severity in this study. Moore *et al.* found differing patterns of injury severity at intersections and non-  
11  
12 intersections.[31]  
13

14  
15 Downhill grade was significantly associated with increased severity for all metrics in unadjusted  
16  
17 analyses, and remained significant in the final model for ambulance transport. Three previous studies  
18  
19 have shown that injury severity is greater with grades.[23,24,31] Downhill grade is likely to be  
20  
21 associated with increased cyclist (and motor vehicle) speed, and therefore increased force of impact.  
22  
23

24 Our earlier analyses found that downhill slopes were associated with higher injury crash risk, and  
25  
26 that uphill grades deter cycling.[15,17,18] This suggests that, wherever possible, routing bicycle  
27  
28 facilities where slopes are gentle is a good strategy for both reducing injuries and motivating cycling.  
29  
30

31  
32 Higher average motor vehicle speed was associated with increased severity for all metrics, and  
33  
34 remained significant in the final model for ambulance transport. Other studies found higher speed  
35  
36 roads to be associated with greater injury severity to cyclists.[23,24,37] Our earlier analyses found  
37  
38 that injury crash risk was lower at intersections where motor vehicle speeds were 30 km/h or lower  
39  
40 and that routes with high vehicle speeds deter cycling.[15,18] This supports recent changes in some  
41  
42 European and North American cities to lower urban speed limits.  
43  
44  
45

### 46 47 **Trip Characteristics**

48  
49 Only one trip characteristic was associated with injury severity. Time of day (night riding) was  
50  
51 associated with a higher odds of hospital admission in unadjusted analyses and was elevated but not  
52  
53 significant in multiple regression. Night-time riding has been associated with increased injury  
54  
55 severity in other studies, especially where roadways were not lit.[24,29,32,33]  
56  
57  
58  
59  
60

1  
2  
3 Although much of the bicycle safety literature focuses on helmets and head injury mitigation,  
4 [22,37,40,41,42] helmet use was not associated with any of the severity metrics in this study. Both  
5  
6 biomechanical studies[42] and epidemiological studies[22,37,40,41] have demonstrated that helmets  
7  
8 can prevent serious skull and brain injuries. This study was not limited to head injuries, likely  
9  
10 contributing to our result that helmet use was not associated with injury severity. In one of the  
11  
12 largest studies to examine helmets, their use was found to significantly reduce head injuries, but was  
13  
14 not associated with serious injury mitigation across all body regions.[22,41] In this context, it is  
15  
16 important to recognize that cyclists may sustain injuries, including serious trauma, to any body part,  
17  
18 including their thorax, abdomen, neck and extremities.[22] A helmet can do nothing to prevent non-  
19  
20 head injuries. Our earlier analyses of crash risk show the potential for all injuries to be significantly  
21  
22 decreased for cyclists separated from motor vehicle traffic in a cycle track or a local street with  
23  
24 traffic diversion[17,18] and the present results show that injury severity significantly increases in a  
25  
26 collision with a motor vehicle. Together these results point to bicycle infrastructure that physically  
27  
28 separates cyclists from motor vehicle traffic to prevent trauma to any area of the body.  
29  
30  
31  
32  
33  
34

### 35 36 **Strengths and limitations**

37  
38 Strengths of the study include two study cities with differing climates, terrain, cycling mode shares  
39  
40 and cycling infrastructure, an urban-only cycling sample, the prospective accrual of subjects,  
41  
42 observation of route characteristics blinded to whether the site was an injury site, and the number of  
43  
44 clinical and cyclist self-report severity metrics.  
45  
46

47  
48 Study limitations include a relatively small sample of injured cyclists, restriction to Canadian cities  
49  
50 and lack of data on the anatomical location of the injury. As in all injury studies, only a portion of  
51  
52 injured cyclists were included; here, those whose injuries were serious enough to be treated at a  
53  
54 hospital emergency department, but not to cause death or a head injury so severe that the trip could  
55  
56  
57  
58  
59  
60

1  
2  
3 not be recalled. This reduced the pool of the most severely injured cases: 2 potential participants  
4 were fatally injured, 26 of those contacted could not remember their route, and 7 could not recall  
5 their crash circumstances. An unknown number of cyclists had injuries so minor that no emergency  
6 department visit was made.  
7  
8  
9

10  
11  
12 Our overall Bicyclists' Injuries and the Cycling Environment study had a case-crossover design that  
13 compared injury sites to control sites within a person-trip, fully controlling for differences between  
14 individuals and trips that might confound the relationship between injury crash risk and  
15 infrastructure (the primary focus of the study). To examine severity of injuries in the current analysis,  
16 the analysis compared participants with more severe injuries ("cases") to those with less severe  
17 injuries ("controls"), introducing the potential for confounding by personal and trip characteristics.  
18 We addressed this via adjustment in our regression models, but the potential for uncontrolled  
19 confounding by unmeasured characteristics remains.  
20  
21  
22  
23  
24  
25  
26  
27  
28  
29  
30  
31

32 Given that we did not have data on more traditional measures of severity, the Abbreviated Injury  
33 Scale and Injury Severity Score, it is important to consider our outcome metrics, their relationship to  
34 each other and their potential reliability and validity as measures of severity. The four metrics  
35 measured different aspects of severity, as described above (Figure 1, Table 2).  
36  
37  
38  
39  
40  
41

42 Hospital admission is based on an in depth medical assessment and should reflect the most severe  
43 injuries. There are no standardized decision criteria, and physicians' decisions to admit emergency  
44 department patients to hospital have been found to differ substantially.[43] Data from Rivara *et al.*  
45 were available to compare hospitalization to Injury Severity Scores above *vs.* below 9.[22]  
46  
47  
48  
49

50 Hospitalization had high specificity (0.94) but lower sensitivity (0.72), suggesting that few patients  
51 with minor injuries are admitted to hospital, but some who are severely injured are not admitted.  
52  
53  
54

55 This could be because some patients with severe injuries (e.g., some extremity fractures, intra-  
56  
57  
58  
59  
60

1  
2  
3 abdominal trauma) may be treated and stabilized in an emergency department then discharged home,  
4  
5 but scheduled for later surgical repair. This may have contributed to our somewhat different results  
6  
7 for hospital admission and its lower correlations with the other metrics.  
8  
9

10 Ambulance transport is based, in part, on whether or not someone at the scene called an ambulance.  
11  
12 It had the strongest correlations with all other outcome metrics. Data from Lang *et al.* were available  
13  
14 to compare ambulance transport to Injury Severity Scores above *vs.* below 12.[44] Ambulance  
15  
16 transfer had low specificity (0.26) but high sensitivity (0.95), opposite to the pattern for  
17  
18 hospitalization. This suggests that most severely injured patients are transported by ambulance, but  
19  
20 so are many who are not severely injured.  
21  
22  
23

24  
25 The CTAS scale is based on assessment by a triage nurse of a standardized list of presenting  
26  
27 complaints, vital sign modifiers, and pain severity.[27] Certain injury mechanisms, e.g., being hit by a  
28  
29 motor vehicle, may be assigned a greater urgency score. CTAS has been frequently tested for  
30  
31 reliability, with kappas for agreement beyond chance spanning a broad range from 0.25 to 0.89.[28]  
32  
33 We found no comparison of CTAS to Injury Severity Scores. We found no validity or reliability data  
34  
35 for continuing to cycle.  
36  
37  
38  
39  
40  
41

## 42 CONCLUSIONS

43  
44  
45 In two of Canada's largest cities, approximately one-third of the bicycle crashes were collisions with  
46  
47 a motor vehicle and the resulting injuries were more severe than in other crash circumstances.

48  
49 Certain route types (in particular multi-use paths and sidewalks), downhill grades, and higher motor  
50  
51 vehicle speeds were also associated with increased injury severity. These results suggest an urgent  
52  
53 need to provide bike facilities that separate cyclists from motor vehicle traffic, that are not designed  
54  
55  
56  
57  
58  
59  
60



1  
2  
3 for pedestrians, and that minimize slopes. These bicycle infrastructure modifications would reduce  
4  
5 both crashes and injury severity after a crash.  
6  
7  
8  
9

10  
11 **ACKNOWLEDGEMENTS:** We would like to thank all the study participants for generously  
12 contributing their time. We appreciate the work of study staff, hospital personnel and our city and  
13 community collaborators. This study evolved from work conducted in the University of British  
14 Columbia's Bridge Program Grant Development course (2005-2006) and benefitted from input  
15 from the participants of that class.  
16  
17  
18  
19  
20  
21  
22

23  
24 **CONTRIBUTORS:** KT, MAH, CCOR, and PC were responsible for initial conception and design  
25 of the study. KT, MAH, CCOR, PC, MW, SB, MC, MDC, JB, SMF, Garth Hunte and Kishore  
26 Mulpuri were responsible for the funding proposal. CCOR, MAH, MW, MDC, KT, Melody Monroe  
27 and Lee Vernich designed and tested data collection instruments. MW, HS and KT developed  
28 algorithms for defining route infrastructure. HS was responsible for data analyses. All authors had  
29 full access to the results of all analyses. PC, HS and KT drafted the article. All authors contributed to  
30 study design and implementation, analysis decisions, interpretation of results, and critical revision of  
31 the article. Evan Beaupré, Niki Blakely, Jill Dalton, Martin Kang, Kevin McCurley, and Andrew  
32 Thomas were responsible for interviews or site observations. Vartouji Jazmaji, Melody Monroe and  
33 Lee Vernich were responsible for supervision and training of study staff, and recruitment of  
34 participants. Barb Boychuk, Jan Buchanan, Doug Chisholm, Nada Elfeki, Garth Hunte, JB, SMF,  
35 and MDC contributed to identification of injured cyclists at the study hospitals. Jack Becker, Bonnie  
36 Fenton, David Hay, Nancy Smith Lea, Peter Sary, Fred Sztabinski, David Tomlinson, and Barbara  
37 Wentworth reviewed the study protocol, data collection forms, and infrastructure definitions from  
38  
39  
40  
41  
42  
43  
44  
45  
46  
47  
48  
49  
50  
51  
52  
53  
54  
55  
56  
57  
58  
59  
60

1  
2  
3 the perspective of professionals or advocates involved in cycling transportation. Data were double  
4 entered by Express Data Ltd.  
5  
6  
7

8  
9 **FUNDING:** This work was supported by a grant from the Heart and Stroke Foundation of Canada  
10 and the Canadian Institutes of Health Research (Institute of Musculoskeletal Health and Arthritis  
11 and Institute of Nutrition, Metabolism and Diabetes) (Grant number: BEO-85863). J. R. Brubacher,  
12 M.A. Harris, and M. Winters were supported by salary awards from the Michael Smith Foundation  
13 for Health Research. M. A. Harris, C. C. O. Reynolds, and M. Winters were supported by salary  
14 awards from the Canadian Institutes of Health Research.  
15  
16  
17  
18  
19  
20  
21

22  
23 **COMPETING INTERESTS:** None.  
24  
25

26 **PATIENT CONSENT:** Obtained  
27  
28

29  
30 **ETHICS APPROVAL:** The study methods were reviewed and approved by the human subjects  
31 ethics review boards of the University of British Columbia (BREB REB H06-03833), the University  
32 of Toronto (#22628), St. Paul's Hospital (BREB REB H06-03833), Vancouver General Hospital  
33 (#V07-0275), St. Michael's Hospital (REB 08-046C), and the University Health Network (Toronto  
34 General Hospital and Toronto Western Hospital; REB 07-0839-AE). All participants gave informed  
35 consent before taking part in the study.  
36  
37  
38  
39  
40  
41  
42

43 **DATA SHARING STATEMENT:** The study database was compiled from interviews with study  
44 participants and site observations by study personnel. It cannot be shared by the authors with  
45 anyone without approval from the University and Hospital human subjects review boards.  
46  
47  
48  
49  
50  
51  
52  
53  
54  
55  
56  
57  
58  
59  
60

## Figure Legend

**Figure 1.** Metrics of severity of cycling injuries to 683 study participants, stratified by CTAS.  
CTAS = Canadian Triage and Acuity Scale, where 5 is the least medically urgent and 1 is the most.

**Figure 2.** Crash circumstances vs. metrics of severity.  
Collisions could be with a motor vehicle, obstacle, surface feature, cyclist, pedestrian, or animal. Motor vehicle “involved” includes both direct collisions with vehicles and crashes resulting from manoeuvres to avoid a motor vehicle.

For peer review only

## REFERENCES

1. Hamer M, Chida Y. Active commuting and cardiovascular risk: a meta-analytic review. *Prev Med* 2008;46(1):9–13
2. Wen LM, Rissel C. Inverse associations between cycling to work, public transport, and overweight and obesity: findings from a population based study in Australia. *Prev Med* 2008;46(1):29–32
3. Beck LF, Dellinger AM, O’Neil ME. Motor vehicle crash injury rates by mode of travel, United States: using exposure-based methods to quantify differences. *Am J Epidemiol* 2007;166(2):212–218
4. Teschke K, Harris MA, Reynolds CCO, *et al.* Exposure-based traffic crash injury rates by mode of travel in British Columbia. *Can J Public Health* 2013;104(1):e75–79
5. Parkin J. Comparisons of cycle use for the journey to work from the ’81, ’91 and 2001 censuses. *Traffic Eng Control* 2003;44(8):299–302
6. Pucher J, Buehler R. Making cycling irresistible: lessons from the Netherlands, Denmark and Germany. *Transp Rev* 2008;28(4):495–528
7. Pucher J, Buehler R, Seinen M. Bicycling renaissance in North America? An update and re-appraisal of cycling trends and policies. *Transp Res Part A Policy Pract* 2011;45(6):451–475
8. Jacobsen PL. Safety in numbers: more walkers and bicyclists, safer walking and bicycling. *Inj Prev* 2003;9(3):205–209.
9. NHTSA *Traffic Safety Facts 2010 Data. Bicyclists and other cyclists.* 2010
10. Transport Canada. *Canadian Motor Vehicle Traffic Collision Statistics: 2010.* 2013
11. Hamann C, Peek-Asa C. On-road bicycle facilities and bicycle crashes in Iowa, 2007–2010. *Accid Anal Prev* 2013;56:103–109

- 1  
2  
3 12. Canadian Institute for Health Information. *Cycling Injury Hospitalizations in Canada, 2009-2010*.  
4  
5 2012  
6
- 7  
8 13. Noland RB. Perceived risk and modal choice: risk compensation in transportation systems.  
9  
10 *Accid Anal Prev* 1995;27(4):503–521  
11
- 12 14. Ogilvie D, Egan M, Hamilton V, *et al*. Promoting walking and cycling as an alternative to  
13 using cars: systematic review. *BMJ* 2004;329(7469):763  
14
- 15 15. Winters M, Brauer M, Setton EM, *et al*. Built environment influences on healthy  
16 transportation choices: bicycling versus driving. *J Urban Health* 2010;87(6):969–993  
17
- 18 16. Reynolds CC., Anne Harris M, Teschke K, *et al*. The impact of transportation infrastructure  
19 on bicycling injuries and crashes: a review of the literature. *Environ Health* 2009;8(1):1–19  
20
- 21 17. Teschke K, Harris MA, Reynolds CCO, *et al*. Route infrastructure and the risk of injuries to  
22 bicyclists: A case-crossover study. *Am J Public Health* 2012;102(12):2336–2343  
23
- 24 18. Harris MA, Reynolds CCO, Winters M, *et al*. Comparing the effects of infrastructure on  
25 bicycling injury at intersections and non-intersections using a case-crossover design. *Inj Prev*  
26 2013;19:303-310  
27
- 28 19. Boström L, Nilsson B. A review of serious injuries and deaths from bicycle accidents in  
29 Sweden from 1987 to 1994. *J Trauma* 2001;50(5):900–907  
30
- 31 20. Chong S, Poulos R, Olivier J, *et al*. Relative injury severity among vulnerable non-motorised  
32 road users: comparative analysis of injury arising from bicycle-motor vehicle and bicycle-  
33 pedestrian collisions. *Accid Anal Prev* 2010;42(1):290–296  
34
- 35 21. Heesch KC, Garrard J, Sahlqvist S. Incidence, severity and correlates of bicycling injuries in  
36 a sample of cyclists in Queensland, Australia. *Accid Anal Prev* 2011;43(6):2085–2092  
37
- 38 22. Rivara FP, Thompson DC, Thompson RS. Epidemiology of bicycle injuries and risk factors  
39 for serious injury. *Inj Prev* 1997;3(2):110–114  
40  
41  
42  
43  
44  
45  
46  
47  
48  
49  
50  
51  
52  
53  
54  
55  
56  
57  
58  
59  
60

- 1  
2  
3  
4  
5  
6  
7  
8  
9  
10  
11  
12  
13  
14  
15  
16  
17  
18  
19  
20  
21  
22  
23  
24  
25  
26  
27  
28  
29  
30  
31  
32  
33  
34  
35  
36  
37  
38  
39  
40  
41  
42  
43  
44  
45  
46  
47  
48  
49  
50  
51  
52  
53  
54  
55  
56  
57  
58  
59  
60
23. Allen-Munley C, Daniel J, Dhar S. Logistic model for rating urban bicycle route safety. *Transp Res Rec* 2004;1878(-1):107–115
  24. Klop J, Khattak A. Factors influencing bicycle crash severity on two-lane, undivided roadways in North Carolina. *Transp Res Rec* 1999;1674(-1):78–85
  25. De Rome L, Boufous S, Georgeson T, *et al.* Bicycle crashes in different riding environments in the Australian capital territory. *Traffic Inj Prev* 2014;15(1):81–88
  26. Harris MA, Reynolds CCO, Winters M, *et al.* The Bicyclists' Injuries and the Cycling Environment study: a protocol to tackle methodological issues facing studies of bicycling safety. *Inj Prev* 2011.
  27. Bullard MJ, Under B, Spence J, *et al.* Revisions to the Canadian Emergency department Triage and Acuity Scale (CTAS) adult guidelines. *CJEM* 2008;10:136-142
  28. Christ M, Grossman F, Winter D, *et al.* Modern triage in the emergency department. *Dtsch Arztebl Int* 2010;107:892-898
  29. Kim J-K, Kim S, Ulfarsson GF, *et al.* Bicyclist injury severities in bicycle-motor vehicle accidents. *Accid Anal Prev* 2007;39(2):238–251
  30. Lustenberger T, Inaba K, Talving P, *et al.* Bicyclists injured by automobiles: relationship of age to injury type and severity--a national trauma databank analysis. *J Trauma* 2010;69(5):1120–1125
  31. Moore DN, Schneider WH, Savolainen PT, *et al.* Mixed logit analysis of bicyclist injury severity resulting from motor vehicle crashes at intersection and non-intersection locations. *Accid Anal Prev* 2011;43(3):621–630
  32. Rifaat SM, Tay R, de Barros A. Effect of street pattern on the severity of crashes involving vulnerable road users. *Accid Anal Prev* 2011;43(1):276–283

- 1  
2  
3  
4 33. Yan X, Ma M, Huang H, *et al.* Motor vehicle–bicycle crashes in Beijing: Irregular maneuvers,  
5 crash patterns, and injury severity. *Accid Anal Prev* 2011;43(5):1751–1758  
6  
7  
8 34. Begg DJ, Langley JD, Stephenson S. Identifying factors that predict persistent driving after  
9 drinking, unsafe driving after drinking, and driving after using cannabis among young adults.  
10  
11 *Accid Anal Prev* 2003;35(5):669–675  
12  
13  
14 35. Nieves JW, Formica C, Ruffing J, *et al.* Males have larger skeletal size and bone mass than  
15 females, despite comparable body size. *J Bone Miner Res* 2005;20(3):529–535  
16  
17  
18 36. Wu C, Yao L, Zhang K. The red-light running behavior of electric bike riders and cyclists at  
19 urban intersections in China: an observational study. *Accid Anal Prev* 2012;49:186–192  
20  
21  
22 37. Bambach MR, Mitchell RJ, Grzebieta RH, *et al.* The effectiveness of helmets in bicycle  
23 collisions with motor vehicles: A case-control study. *Accid Anal Prev* 2013;53:78–88  
24  
25  
26 38. Teschke K, Frendo T, Shen H, *et al.* Do bicycling crash circumstances vary by route type? A  
27 cross-sectional study. *BMC Public Health* 2014, submitted  
28  
29  
30 39. Slaughter DR, Williams N, Wall SP, *et al.* A community traffic safety analysis of pedestrian  
31 and bicyclist injuries based on the catchment area of a trauma center. *J Trauma Acute Care*  
32 *Surg* 2014;76(4):1103–1110  
33  
34  
35 40. Elvik R. Publication bias and time-trend bias in meta-analysis of bicycle helmet efficacy: A  
36 re-analysis of Attewell, Glase and McFadden, 2001. *Accid Anal Prev* 2011;43(3):1245–1251  
37  
38  
39 41. Thompson DC, Rivara FP, Thompson RS. Effectiveness of bicycle safety helmets in  
40 preventing head injuries. A case-control study. *JAMA* 1996;276(24):1968–1973  
41  
42  
43 42. Cripton PA, Dressler DM, Stuart CA, *et al.* Bicycle helmets are highly effective at preventing  
44 head injury during head impact: Head-form accelerations and injury criteria for helmeted and  
45  
46  
47  
48  
49  
50  
51  
52  
53  
54  
55  
56  
57  
58  
59  
60

- 1  
2  
3  
4  
5  
6  
7  
8  
9  
10  
11  
12  
13  
14  
15  
16  
17  
18  
19  
20  
21  
22  
23  
24  
25  
26  
27  
28  
29  
30  
31  
32  
33  
34  
35  
36  
37  
38  
39  
40  
41  
42  
43  
44  
45  
46  
47  
48  
49  
50  
51  
52  
53  
54  
55  
56  
57  
58  
59  
60
43. Mutrie D, Bailey SK, Malik S. Individual emergency physician admission rates: predictably unpredictable. *CJEM* 2009;11:149-155
44. Lang J, Dallow N, Lang A, *et al.* Inclusion of minor trauma cases provides a better estimate of the total burden of injury: Queensland Trauma Registry provides a unique perspective. *Injury* 2014;45:1236-1241



1  
2  
3  
4 **Severity of urban cycling injuries in two Canadian cities and their relationship with personal,**  
5 **trip, route and crash characteristics: Case-control analyses using four severity metrics**  
6  
7  
8  
9

10  
11  
12 Peter A. Cripton<sup>1</sup>, Hui Shen<sup>2</sup>, Jeff R. Brubacher<sup>3</sup>, Mary Chipman<sup>4</sup>, Steven M. Friedman<sup>5,6</sup>, M. Anne  
13  
14 Harris<sup>7</sup>, Meghan Winters<sup>8</sup>, Conor C.O. Reynolds<sup>9</sup>, Michael D. Cusimano<sup>10,11</sup>, Shelina Babul<sup>12</sup>, Kay  
15  
16 Teschke<sup>2,\*</sup>  
17  
18

19  
20 \* Corresponding author

21  
22 School of Population and Public Health, University of British Columbia, 2206 East Mall,  
23  
24 Vancouver, BC, Canada, V6T 1Z3

25  
26 [kay.teschke@ubc.ca](mailto:kay.teschke@ubc.ca)

27  
28  
29 604 822-2041  
30  
31  
32

33  
34 <sup>1</sup>Department of Mechanical Engineering, University of British Columbia, Vancouver, Canada  
35

36  
37 <sup>2</sup>School of Population and Public Health, University of British Columbia, Vancouver, Canada  
38

39  
40 <sup>3</sup>Department of Emergency Medicine, University of British Columbia, Vancouver, Canada  
41

42  
43 <sup>4</sup>Dalla Lana School of Public Health, University of Toronto, Toronto, Canada  
44

45  
46 <sup>5</sup>Faculty of Medicine, University of Toronto, Toronto, Canada  
47

48  
49 <sup>6</sup>University Health Network, Toronto, Canada  
50

51  
52 <sup>7</sup>School of Occupational and Public Health, Ryerson University, Toronto, Canada  
53  
54

55  
56 <sup>8</sup>Faculty of Health Sciences, Simon Fraser University, Burnaby, Canada  
57  
58  
59  
60

1  
2  
3  
4  
5  
6  
7  
8  
9  
10  
11  
12  
13  
14  
15  
16  
17  
18  
19  
20  
21  
22  
23  
24  
25  
26  
27  
28  
29  
30  
31  
32  
33  
34  
35  
36  
37  
38  
39  
40  
41  
42  
43  
44  
45  
46  
47  
48  
49  
50  
51  
52  
53  
54  
55  
56  
57  
58  
59  
60

<sup>9</sup>Institute for Resources, Environment and Sustainability, University of British Columbia,  
Vancouver, Canada

<sup>10</sup>Division of Neurosurgery and Injury Prevention Research Office, Keenan Research Centre, St.  
Michael's Hospital, Toronto, Canada

<sup>11</sup>Departments of Surgery and Education and Public Health, University of Toronto, Toronto,  
Canada

<sup>12</sup>Department of Pediatrics, University of British Columbia, Vancouver, Canada

Abstract word count: 291

Article word count: 4040 (excluding acknowledgements)

Key words: Bicycle; injury severity; bike lanes; epidemiology

## ABSTRACT

**Objective:** To examine the relationship between cycling injury severity and personal, trip, route and crash characteristics.

**Methods:** Data from the **Bicyclists' Injuries and the Cycling Environment Study** conducted in Toronto and Vancouver, Canada, were used to classify injury severity using four metrics: 1) did not continue trip by bike; 2) transported to hospital by ambulance; 3) admitted to hospital; and 4) Canadian Triage and Acuity Scale (CTAS). Multiple logistic regression was used to examine associations with personal, trip, route and crash characteristics.

**Results:** Of 683 **adults injured while cycling**, 528 did not continue their trip by bike, 251 were transported by ambulance, and 60 were admitted to hospital for further treatment. Treatment urgencies included 75 as CTAS=1 or 2 (most medically urgent), 284 as CTAS=3, and 320 as CTAS=4 or 5 (least medically urgent). Older age and collision with a motor vehicle were each significantly associated with increased severity in three metrics (**both variables with ambulance transport and CTAS; age with hospital admission; and motor vehicle collision with did not continue by bike**). Factors significantly associated with more severe injuries in one metric included **more frequent cycling (medically urgent); female sex and crashes at non-intersection locations (did not continue by bike), on multi-use paths or local streets (admitted to hospital) and on sidewalks, downhill grades, and sites with higher motor vehicle speeds (ambulance transport)**.

**Conclusions:** In two of Canada's largest cities, about one-third of the bicycle crashes were collisions with motor vehicles and the resulting injuries were more severe than in other crash circumstances, underscoring the importance of separating cyclists from motor vehicle traffic. Our results also

1  
2  
3 suggest that facilities **that are not designed with pedestrians in mind** and that minimize slopes would  
4  
5 reduce both bicycling injury severity and crash risk.  
6  
7  
8  
9

### 10 11 **Strengths and Limitations of this Study** 12

- 13  
14  
15  
16 • This study is one of few to examine the relationship between route characteristics and  
17 severity of bicycling injuries. Its major strength was use of data from a study of bicycling  
18 injury crash risk. This made it possible to consider whether route characteristics that  
19 increased crash risk were similar to or different from those that increased bicycling injury  
20 severity.  
21  
22
- 23 • The results show that bike facilities that separate cyclists from motor vehicle traffic, **that are**  
24 **not designed for pedestrians**, and that minimize slopes would reduce both injury severity  
25 after a crash and reduce crash risk.  
26  
27
- 28 • The analyses examined four metrics covering different aspects of injury severity (not able to  
29 continue the trip by bike, transport to hospital by ambulance, admission to hospital, and  
30 treatment urgency) and identified factors that were consistently associated with increased  
31 risk: increased age and collision with a motor vehicle.  
32  
33
- 34 • The study included a range of injury severities resulting in emergency treatment at a hospital  
35 but did not include those so severely injured they could not remember their trip, nor those  
36 with such minor injuries that emergency treatment was not required.  
37  
38
- 39 • The influence of route characteristics on severity was adjusted for potential confounding by  
40 personal and trip characteristics in the regression models, but the potential for uncontrolled  
41 confounding by unmeasured characteristics remains.  
42  
43  
44  
45  
46  
47  
48  
49  
50  
51  
52  
53  
54  
55  
56  
57  
58  
59  
60

## INTRODUCTION

Cycling is used for transportation and is a popular recreational activity. Its health benefits are clear, [1,2] in contrast to motor vehicle travel. Transportation cycling has risks in the same order of magnitude as driving and walking in the US and Canada.[3,4] However it is not nearly as safe as in some European countries where cycling participation is much higher.[5-8]

In 2010, there were 618 cyclist traffic deaths in the United States and 60 in Canada.[9,10] Broader data (including bicycling sports such as mountain biking) indicate that about 27,800 Americans and 4,300 Canadians were hospitalized for cycling injuries in 2009.[11,12] Although bicycling injuries are a small proportion of all traffic injuries and deaths in North America (~2 to 4%),[9,10] reducing their incidence is important because of the direct harm that they do and because they deter potential cyclists.[13-15]

The reason postulated for the inversion of cycling activity and injury risk between North America and Europe is the well-designed bicycle-specific infrastructure in Europe *vs.* its relative paucity in North America. We reviewed published studies and found that bicycle-specific infrastructure was associated with decreased injury risk, but a small range of infrastructure had been studied, often with uncertain control of exposure to risk.[16] We subsequently conducted a case-crossover study of the association between route infrastructure and crash risk: **the Bicyclists' Injuries and the Cycling Environment Study**. [17,18] **It found that** infrastructure that was bicycle-specific (e.g., cycle tracks separated from traffic, bike lanes) or “bicycle-friendly” (e.g., local streets with traffic diversion) had considerably lower injury risk. Other features were found to increase risk: streetcar or train tracks, downhill grades, construction, major street intersections, and traffic circles at local street intersections. This work was designed to estimate associations with injury risk, with a no-injury control.

1  
2  
3 An alternative line of inquiry is what factors are associated with injury severity, among those who  
4 have been injured. Many studies have found that collisions with motor vehicles increase cyclist injury  
5 severity.[11,19-22] However few authors have examined severity with respect to route  
6 infrastructure.[23-25] Higher severity has been found with grades, higher speed roads, and crashes in  
7 traffic or on shared paths.[23-25] Although these results suggest that predictors of cycling injury risk  
8 may be similar to predictors of injury severity, this is not established, and our study offers the  
9 opportunity to examine both sets of outcomes, adding a level of context for policy makers,  
10 infrastructure designers and other stakeholders. In our opinion, injury severity, not just the fact of  
11 an injury, is a second and equally important criterion used by the lay public to evaluate the apparent  
12 safety of cycling.  
13  
14  
15  
16  
17  
18  
19  
20  
21  
22  
23  
24  
25  
26

27 Therefore we **conducted additional analyses of data from the Bicyclists' Injuries and the Cycling**  
28 **Environment Study to examine** the relationship between injury severity and personal, trip, route and  
29 crash characteristics.  
30  
31  
32  
33  
34  
35  
36

## 37 **METHODS**

38  
39  
40 Methods of study conduct and reliability testing have been described in detail elsewhere.[17,26] The  
41 study population consisted of adult ( $\geq 19$  years) residents of Toronto and Vancouver who were  
42 injured while riding a bicycle in the city and treated within 24 hours in the emergency departments  
43 of the following hospitals between May 18, 2008 and November 30, 2009: St. Paul's or Vancouver  
44 General in Vancouver; St. Michael's, Toronto General or Toronto Western in Toronto. Those who  
45 were fatally injured or so severely injured that they were unable to remember their trip were not  
46 included.  
47  
48  
49  
50  
51  
52  
53  
54  
55  
56  
57  
58  
59  
60

1  
2  
3 Data on characteristics related to severity were abstracted from emergency department records. In  
4  
5 addition, eligible participants were interviewed in person by trained interviewers about personal  
6  
7 characteristics, trip characteristics, and crash circumstances, using a structured questionnaire  
8  
9  
10 (<http://cyclingingcities.spph.ubc.ca/files/2011/10/InterviewFormFinal.pdf>).  
11

12  
13 The study was not designed to focus on severity, so the data did not include classical severity scoring  
14  
15 using the Abbreviated Injury Scale. However we did have access to four other indicators of severity:  
16

- 17  
18 1. Whether the subject continued their trip by bicycle (self-reported in the interview), no vs. yes
- 19  
20 2. Whether the subject was transported by ambulance (hospital data), yes vs. no
- 21  
22 3. Whether the subject was admitted to hospital (hospital data), yes vs. no
- 23  
24 4. Canadian Triage and Acuity Scale (CTAS) (hospital data), levels 1 to 5, defined as  
25  
26 follows:[27,28]

- 27  
28  
29 • 1 – Resuscitation; need to be seen immediately
- 30  
31 • 2 – Emergent; need to be seen within 15 minutes
- 32  
33 • 3 – Urgent; need to be seen within 30 minutes
- 34  
35 • 4 – Less urgent; need to be seen within 60 minutes
- 36  
37 • 5 – Non urgent, need to be seen within 120 minutes
- 38  
39  
40  
41

42  
43 The relationship between these severity metrics was examined descriptively using cross-tabulations  
44  
45 and Pearson correlation coefficients.  
46

47  
48 Site observations were made to document characteristics of crash and control sites, and allow route  
49  
50 infrastructure classification.[17,18] The observations were made blind to whether an injury took  
51  
52 place at the site or not. In the current analyses, only the crash site data was used.  
53  
54

55  
56 Unconditional logistic regression was used to examine associations of each of the following  
57  
58 independent variables with each severity outcome metric:  
59  
60

- personal characteristics: sex; age; how frequently he/she cycled; whether the cyclist considered himself/herself experienced, had taken a cycling training course, had a driver's license
- trip characteristics: time of day; weather; helmet use; use of visible clothing on the trunk; whether bike lights were turned on; alcohol and drug use in the 6 hours prior
- route characteristics at the injury crash site: type of route; intersection location; presence of bike signage; junctions; construction; streetcar tracks; grade; average vehicle speed; distance visible along route.
- crash circumstances: collision (with a motor vehicle, obstacle, surface feature, cyclist, pedestrian, or animal) vs. fall; collision with a motor vehicle vs. not; motor vehicle "involvement" (i.e., both direct collisions with vehicles and crashes resulting from motor vehicle avoidance manoeuvres) vs. not. No data on fault in the crash was collected.

All independent variables significant at  $p < 0.05$  in simple logistic regression (unadjusted analysis) of any severity metric were included in multiple regression models for all four severity metrics. The rationale for this broad inclusion of variables in the final models was to maximize control of potential confounding by personal and trip characteristics, to allow comparison of results across severity metrics, and to ensure that characteristics previously shown to be consistently related to injury severity were included in all the models (i.e., age, crash circumstance).

For dichotomous severity metrics (did not continue by bike, ambulance transport, hospital admission), traditional logistic regression was used, with the more severe injury category treated as the outcome ("case") group and the less severe as the comparison ("control") group. For CTAS, ordinal logistic regression modeled the odds of a more urgent CTAS group, after verifying that the proportional odds assumption was valid. CTAS categories were grouped as follows: most urgent, levels 1 or 2; moderate urgency, 3; least urgency, 4 or 5.



1  
2  
3 Additional analyses were conducted to evaluate the models. Analyses were run without the motor  
4 vehicle collision variable and, separately, without the route type variable to determine whether either  
5  
6 changed the relationship of the other to severity in the full models. Separate analyses were conducted  
7  
8 for motor vehicle collisions and other collisions to determine whether there was interaction between  
9  
10 the motor vehicle collision and route type variables.  
11  
12  
13  
14  
15  
16  
17

## 18 RESULTS

19  
20 The study included 690 injured cyclists (414 in Vancouver, 276 in Toronto). Seven were unable to  
21 recall their crash circumstances, so were removed from analyses; none of these continued by bike,  
22  
23 six were transported by ambulance, their CTAS scores were either 1 or 2, and one was admitted to  
24  
25 hospital. After these subjects were excluded, 683 subjects remained for most analyses, though four  
26  
27 additional subjects did not have information on CTAS or ambulance transport.  
28  
29  
30  
31  
32

33 Descriptive data about the study participants, the trips when their injuries occurred, the  
34 characteristics of the route at the crash site, and the crash circumstances are presented in Table 1.  
35  
36 Most participants were men, young, and regular cyclists. Most wore a helmet, but few wore bright  
37  
38 clothing or used bike lights. Most of the injury sites were on major or local streets with little or no  
39  
40 cycling infrastructure and most were at non-intersection locations. A minority of injuries occurred at  
41  
42 sites with bike-specific infrastructure.  
43  
44  
45  
46

47 Most of the crashes were collisions (74%, n=506) rather than falls. Direct collisions with motor  
48  
49 vehicles (34%, n=231) were the most frequent collision type. Crashes “involving” motor vehicles  
50  
51 (48%, n=330) included direct collisions, as well as crashes to avoid motor vehicle collisions (14%,  
52  
53 n=99). Few collisions involved other cyclists (3%, n=22), pedestrians (2%, n=12) or animals (1%,  
54  
55 n=6).  
56  
57  
58  
59  
60

**Table 1.** Personal characteristics of the cyclists, characteristics of the trip when the injury occurred, characteristics of the route at the site where the crash occurred, and crash circumstances (N=683)

|                                                                                                                                                 | N (%)     |
|-------------------------------------------------------------------------------------------------------------------------------------------------|-----------|
| <b>Personal characteristics</b>                                                                                                                 |           |
| Male                                                                                                                                            | 404 (59%) |
| Age                                                                                                                                             |           |
| 19 to 29                                                                                                                                        | 262 (39%) |
| 30 to 39                                                                                                                                        | 167 (25%) |
| 40 to 49                                                                                                                                        | 115 (17%) |
| 50 to 59                                                                                                                                        | 81 (12%)  |
| ≥ 60                                                                                                                                            | 55 (8.1%) |
| Regular cyclist (cycled ≥ 52 times per year)                                                                                                    | 602 (88%) |
| Had a driver's license                                                                                                                          | 613 (90%) |
| Considered themselves experienced                                                                                                               | 637 (93%) |
| Had taken a cycling training course                                                                                                             | 42 (6.1%) |
| <b>Trip characteristics</b>                                                                                                                     |           |
| Time of day                                                                                                                                     |           |
| Day                                                                                                                                             | 530 (78%) |
| Dawn or dusk                                                                                                                                    | 50 (7.3%) |
| Night                                                                                                                                           | 103 (15%) |
| Clear weather                                                                                                                                   | 473 (69%) |
| Helmet worn                                                                                                                                     | 472 (69%) |
| Bright clothing worn                                                                                                                            | 228 (33%) |
| Bike lights turned on                                                                                                                           | 133 (19%) |
| Alcohol consumed in previous 6 h                                                                                                                | 70 (10%)  |
| Drugs consumed in previous 6 h                                                                                                                  | 78 (11%)  |
| <b>Route characteristics at the injury sites</b>                                                                                                |           |
| Route types                                                                                                                                     |           |
| Major streets (arterials and collectors, most with no bicycle infrastructure, a few with shared lanes, n=22)                                    | 289 (42%) |
| Local streets (mainly residential, many designated as bikeways, n=99)                                                                           | 187 (27%) |
| Sidewalks                                                                                                                                       | 52 (7.6%) |
| Multi-use paths (designated for pedestrian and bicyclists)                                                                                      | 73 (11%)  |
| Bicycle-specific infrastructure (bike lanes on major streets, n=59; cycle tracks alongside major streets, n=2; and off-street bike paths, n=21) | 82 (12%)  |
| At an intersection                                                                                                                              |           |
| Junctions in last 100 m                                                                                                                         | 211 (31%) |
| Bike signage present                                                                                                                            | 593 (87%) |
| Construction present                                                                                                                            | 76 (11%)  |
| Streetcar or train tracks present                                                                                                               | 85 (12%)  |
| Downhill grade                                                                                                                                  | 149 (22%) |
| Average vehicle speed > 30 km/h                                                                                                                 | 329 (48%) |
| Forward distance visible < 20 m                                                                                                                 | 363 (53%) |
| Forward distance visible < 20 m                                                                                                                 | 12 (1.8%) |
| <b>Crash circumstances</b>                                                                                                                      |           |
| Collision with motor vehicle                                                                                                                    | 231 (34%) |
| Collision with streetcar or train tracks                                                                                                        | 97 (14%)  |
| Collision with other surface features (e.g., pothole, rock, roots, leaves, ice)                                                                 | 69 (10%)  |
| Collision with obstacle (e.g., post, curb, planter, lane divider)                                                                               | 69 (10%)  |
| Collision with cyclist, pedestrian, animal                                                                                                      | 40 (5.9%) |
| Falls                                                                                                                                           | 177 (26%) |

Figure 1 shows the distribution of subjects by the severity metrics, stratified by CTAS. The most urgent CTAS scores (1 or 2, n=75) were assigned to 11% of all subjects, 14% of those who did not continue by bike, 25% of those transported by ambulance and 28% of those who were admitted to

hospital. Table 2 provides additional detail on the relationship between the metrics. Of the 251 subjects transported to hospital by ambulance, 99% did not continue by bike. Of the 60 subjects admitted to hospital, 100% did not continue by bike, and 75% were transported by ambulance. Pearson correlations show associations in the expected directions, but the correlations were not strong. Thus the four metrics had logical relationships to each other, but did not measure identical constructs.

**Table 2.** Relationship between the four metrics of severity: Pearson correlation coefficients above the diagonal; numbers of subjects below the diagonal.

|                                              | Did not continue by bike | Transported to hospital by ambulance | Admitted to hospital | CTAS* |
|----------------------------------------------|--------------------------|--------------------------------------|----------------------|-------|
| Did not continue by bike (n=528)             | –                        | 0.40                                 | 0.17                 | -0.29 |
| Transported to hospital by ambulance (n=251) | 249                      | –                                    | 0.24                 | -0.39 |
| Admitted to hospital (n=60)                  | 60                       | 45                                   | –                    | -0.20 |
| CTAS = 1 or 2 (n=75)                         | 74                       | 62                                   | 17                   | –     |

\* Correlations with CTAS were negative because the scale was in the opposite direction, with 1 = most urgent and 5 = least urgent. All other metrics were assigned 1 = more vs. 0 = less severe.

Figure 2 shows the severity metrics against crash circumstances, classified three ways. Collisions tended to be more severe than falls, and crashes “involving” motor vehicles tended to be more severe than those not. Direct collisions with motor vehicles had the highest proportion in the more severe category of every metric except admitted to hospital. In unadjusted analyses, collision (of any type) and motor vehicle “involvement” both had elevated odds ratios for the same severity metrics as motor vehicle collision (data not shown), but the odds ratios were lower, indicating that it was direct collision with a motor vehicle that led to increased severity. Only the motor vehicle collision variable was included in multiple regression models.

Table 3 shows the results of the multiple logistic regression models for each severity metric, including all independent variables statistically significant in at least one unadjusted analysis. Four personal characteristic variables were included: age, sex, cycling experience, and cycling frequency.

1  
2  
3 Age showed consistent associations across all severity metrics; older age groups had more severe  
4 injuries, significantly so for ambulance transport, admission to hospital and CTAS. Women were  
5 significantly more likely to stop their trip by bike than men. There was a tendency for more  
6 experienced and more regular cyclists to have higher injury severity, though only one association was  
7 statistically significant in multiple regression.  
8  
9

10  
11 Cyclists whose crash was a direct collision with a motor vehicle had elevated odds ratios for all  
12 severity metrics, statistically significant for not continuing by bike, being transported by ambulance  
13 and more urgent triage score (CTAS). Those whose crash sites were on multi-use paths, sidewalks  
14 and local streets tended to have more severe injuries than those who crashed on major streets;  
15 significant associations were observed for certain associations with ambulance transport and hospital  
16 admission. Crashes at intersections had inconsistent results; the only significant odds ratio indicated  
17 that those injured at an intersection were less likely to stop their trip by bike. Downhill grades were  
18 consistently related to greater injury severity, significantly so for transportation by ambulance. The  
19 same pattern was observed for higher average motor vehicle speeds at the crash location. Time of  
20 day and presence of streetcar tracks were both significant in some unadjusted analyses, but did not  
21 remain so in multiple regression.  
22  
23  
24  
25  
26  
27  
28  
29  
30  
31  
32  
33  
34  
35  
36  
37  
38  
39

40  
41 The following independent variables were not associated with any of the injury severity metrics in  
42 unadjusted analyses and were not included in multiple regression: whether the participant had taken  
43 a cycling training course or had a driver's license; weather; use of a helmet, visible clothing on the  
44 trunk, or bike lights; alcohol or drug use in the 6 hours prior to the trip; presence of bike signage,  
45 junctions, or construction; and distance visible along the route.  
46  
47  
48  
49  
50  
51  
52  
53  
54  
55  
56  
57  
58  
59  
60

**Table 3.** Odds ratios (OR) and 95% confidence intervals (CI) for associations between metrics of injury severity and personal, trip, crash circumstance, and route characteristics (N=683). Multiple logistic regression models; all independent variables significant in at least one unadjusted analysis included.

|                                                         | Did not continue<br>by bike<br>N=528 (77%)<br>OR (95% CI) | Transported to<br>hospital by<br>ambulance<br>N=251 (37%)<br>OR (95% CI) | Admitted to<br>hospital<br>N=60 (8.8%)<br>OR (95% CI) | CTAS †<br>1 or 2, N=75 (11%)<br>3, N=284 (42%)<br>4 or 5, N=320 (47%)<br>OR (95% CI) |
|---------------------------------------------------------|-----------------------------------------------------------|--------------------------------------------------------------------------|-------------------------------------------------------|--------------------------------------------------------------------------------------|
| <b>Sex</b>                                              |                                                           |                                                                          |                                                       |                                                                                      |
| Male                                                    | 1 (reference)                                             | 1 (reference)                                                            | 1 (reference)                                         | 1 (reference)                                                                        |
| Female                                                  | <b>1.91 (1.26 – 2.92)</b>                                 | 1.34 (0.93 – 1.93)                                                       | 1.07 (0.59 – 1.94)                                    | 0.98 (0.71 – 1.35)                                                                   |
| <b>Age</b>                                              |                                                           |                                                                          |                                                       |                                                                                      |
| 19 to 29                                                | 1 (reference)                                             | 1 (reference)                                                            | 1 (reference)                                         | 1 (reference)                                                                        |
| 30 to 39                                                | 1.15 (0.70 – 1.88)                                        | 1.18 (0.75 – 1.85)                                                       | 1.18 (0.54 – 2.61)                                    | 1.29 (0.87 – 1.91)                                                                   |
| 40 to 49                                                | 1.22 (0.70 – 2.14)                                        | 1.40 (0.83 – 2.34)                                                       | 1.96 (0.89 – 4.33)                                    | <b>2.07 (1.33 – 3.23)</b>                                                            |
| 50 to 59                                                | 1.50 (0.77 – 2.95)                                        | 1.04 (0.57 – 1.91)                                                       | 1.02 (0.35 – 2.97)                                    | 1.57 (0.95 – 2.62)                                                                   |
| ≥ 60                                                    | 1.33 (0.63 – 2.82)                                        | <b>2.57 (1.31 – 5.05)</b>                                                | <b>3.52 (1.37 – 9.04)</b>                             | 1.42 (0.78 – 2.60)                                                                   |
| <b>Considered themselves<br/>an experienced cyclist</b> |                                                           |                                                                          |                                                       |                                                                                      |
| No                                                      | 1 (reference)                                             | 1 (reference)                                                            | 1 (reference)                                         | 1 (reference)                                                                        |
| Yes                                                     | 1.36 (0.63 – 2.95)                                        | 2.16 (0.97 – 4.83)                                                       | 1.03 (0.28 – 3.84)                                    | 1.52 (0.78 – 2.95)                                                                   |
| <b>Cycling frequency °</b>                              |                                                           |                                                                          |                                                       |                                                                                      |
|                                                         | 1.00 (0.78 – 1.76)                                        | 0.92 (0.72 – 1.08)                                                       | 1.18 (0.85 – 1.50)                                    | <b>1.18 (1.00 – 1.38)</b>                                                            |
| <b>Time of day</b>                                      |                                                           |                                                                          |                                                       |                                                                                      |
| Day                                                     | 1 (reference)                                             | 1 (reference)                                                            | 1 (reference)                                         | 1 (reference)                                                                        |
| Dusk or dawn                                            | 0.65 (0.33 – 1.29)                                        | 0.53 (0.24 – 1.13)                                                       | 0.75 (0.21 – 2.62)                                    | 0.72 (0.39 – 1.30)                                                                   |
| Night                                                   | 0.90 (0.53 – 1.54)                                        | 1.16 (0.71 – 1.90)                                                       | 1.87 (0.90 – 3.86)                                    | 0.90 (0.58 – 1.40)                                                                   |
| <b>Motor vehicle collision</b>                          |                                                           |                                                                          |                                                       |                                                                                      |
| No                                                      | 1 (reference)                                             | 1 (reference)                                                            | 1 (reference)                                         | 1 (reference)                                                                        |
| Yes                                                     | <b>3.46 (2.07 – 5.76)</b>                                 | <b>3.66 (2.44 – 5.48)</b>                                                | 1.27 (0.63 – 2.54)                                    | <b>2.03 (1.41 – 2.90)</b>                                                            |
| <b>Route type</b>                                       |                                                           |                                                                          |                                                       |                                                                                      |
| Major street                                            | 1 (reference)                                             | 1 (reference)                                                            | 1 (reference)                                         | 1 (reference)                                                                        |
| Local street                                            | 1.08 (0.61 – 1.92)                                        | 1.44 (0.86 – 2.39)                                                       | <b>2.76 (1.15 – 6.62)</b>                             | 1.18 (0.75 – 1.84)                                                                   |
| Sidewalk                                                | 1.15 (0.42 – 3.19)                                        | <b>3.72 (1.37 – 10.1)</b>                                                | 3.26 (0.51 – 20.7)                                    | 1.31 (0.56 – 3.06)                                                                   |
| Multi-use path                                          | 1.33 (0.52 – 3.44)                                        | 2.18 (0.83 – 5.77)                                                       | <b>7.56 (1.43 – 40.0)</b>                             | 1.22 (0.55 – 2.68)                                                                   |
| Bicycle-specific<br>infrastructure                      | 0.98 (0.50 – 1.94)                                        | 1.02 (0.55 – 1.89)                                                       | 0.89 (0.27 – 2.99)                                    | 1.27 (0.74 – 2.18)                                                                   |
| <b>Intersection</b>                                     |                                                           |                                                                          |                                                       |                                                                                      |
| No                                                      | 1 (reference)                                             | 1 (reference)                                                            | 1 (reference)                                         | 1 (reference)                                                                        |
| Yes                                                     | <b>0.57 (0.36 – 0.88)</b>                                 | 1.44 (0.98 – 2.13)                                                       | 1.04 (0.53 – 2.04)                                    | 0.89 (0.63 – 1.26)                                                                   |
| <b>Streetcar or train tracks</b>                        |                                                           |                                                                          |                                                       |                                                                                      |
| No                                                      | 1 (reference)                                             | 1 (reference)                                                            | 1 (reference)                                         | 1 (reference)                                                                        |
| Yes                                                     | 1.11 (0.65 – 1.91)                                        | 1.03 (0.63 – 1.70)                                                       | 0.98 (0.39 – 2.47)                                    | 1.36 (0.88 – 2.10)                                                                   |
| <b>Grade</b>                                            |                                                           |                                                                          |                                                       |                                                                                      |

|                                               |                    |                           |                    |                    |
|-----------------------------------------------|--------------------|---------------------------|--------------------|--------------------|
| Flat or uphill                                | 1 (reference)      | 1 (reference)             | 1 (reference)      | 1 (reference)      |
| Downhill                                      | 1.32 (0.89 – 1.96) | <b>1.62 (1.14 – 2.32)</b> | 1.23 (0.68 – 2.22) | 1.31 (0.96 – 1.79) |
| <b>Motor vehicle speed <math>\beta</math></b> | 1.05 (0.89 – 1.24) | <b>1.21 (1.01 – 1.43)</b> | 1.24 (0.91 – 1.69) | 1.08 (0.94 – 1.24) |

† CTAS = Canadian Triage and Acuity Scale, grouped into 3 categories for analysis using ordinal logistic regression; the odds ratio represents the comparison of categories 1 & 2 vs. 3, 4 & 5 and categories 1, 2 & 3 vs. 4 & 5 under the proportional odds assumption. **The proportional odds assumption was met, meaning that the odds ratios for these two comparisons are equivalent.**

◦ **Mean cycling frequency = 152 trips/y, SD = 81 trips/y; Odds ratios and confidence intervals calculated for a one standard deviation increase**

$\beta$  **Mean motor vehicle speed = 36 km/h, SD = 9.5 km/h; odds ratios and confidence intervals calculated for a one standard deviation increase. This is a mean of means: 683 sites, each with 5 speed measurements taken during the site observation period (~30 minutes), then averaged. Speeds were measured using a Bushnell Velocity Speed Gun (Overland Park, KS).**

## DISCUSSION

In this study, using four severity metrics that spanned rider self-evaluation (unable to continue by bike) to clinical-practitioner evaluation (CTAS), we found that the following characteristics were associated with more severe injuries: older age; female sex; more experience and frequency of cycling; collision with a motor vehicle; crash on a multi-use path, sidewalk or local street, at non-intersection location, on a downhill grade, and at locations with higher motor vehicle speeds.

### Personal Characteristics

Older age has frequently been associated with more severe injuries in bicycling crashes.[19-22, 29-33]

We observed the same for all metrics, though the odds ratio was not always statistically significant.

This pattern is attributed to increasing frailty with age and has been observed for all vulnerable road users.[32]

Although sex has frequently been associated with bicycling injury severity, the evidence does not show a clear pattern. We found that women were less likely to continue their trip by bicycle and had a non-significant increased chance of ambulance transport. Moore *et al.* found women to have more severe injuries,[31] but others have found higher severities in men.[19,22,32] Theories for each of these results are available. The smaller average size of women may make them more vulnerable and

1  
2  
3 men may be more comfortable handling minor injuries without help. A greater propensity for risk-  
4 taking and speed may provide opportunities for men to have higher impact crashes.[34-36]  
5  
6

7  
8 We found that experienced cyclists and those who cycled more frequently had greater injury severity  
9 (more likely to need ambulance transport, or to have a more urgent triage score, respectively).  
10

11 Similarly Heesh *et al.* found that frequent and experienced cyclists had more severe injuries.[21]  
12

13 These cyclists may travel at higher speeds and incur higher impact forces in a crash.  
14  
15

### 16 17 18 **Crash Circumstances** 19

20 About a third of the injuries were collisions with motor vehicles. These were strongly associated  
21 with three of our four injury severity metrics. In other research, collisions with motor vehicles have  
22 consistently been associated with increased severity.[11,19-22] Collisions with larger vehicles have  
23 resulted in more severe injuries and fatalities.[29,31,33,37]  
24  
25  
26  
27  
28  
29

30 Previous analyses of our **Bicyclists' Injuries and the Cycling Environment study data** showed that  
31 collisions with motor vehicles were associated with route type.[38] They never occurred on off-street  
32 bike paths or on cycle tracks (separated bike lanes), and were over-represented on major streets with  
33 parked cars and no bike infrastructure. **Therefore, for the severity analyses presented here,** we  
34 considered whether route type confounded the association between collision with a motor vehicle  
35 and severity (and vice versa), but this was not the case, nor was there interaction between the two  
36 variables (data not shown).  
37  
38  
39  
40  
41  
42  
43  
44  
45  
46

47 The severity of direct collisions with motor vehicles provides clear rationale for transportation  
48 planners to minimize interactions between cyclists and vehicles. This planning approach is  
49 supported by the results of our earlier analyses of injury crash risk: cycle tracks (bike lanes that  
50 physically separate cyclists and motor vehicle traffic) were associated with 1/9<sup>th</sup> the risk compared to  
51 streets with no bicycle infrastructure.[17] Separating modes of traffic with large differences in speed  
52  
53  
54  
55  
56  
57  
58  
59  
60

1  
2  
3 and mass is a principle used by countries such as Sweden, Germany, Denmark and the Netherlands  
4  
5 where bicycling injury risk is much lower than in North America.[6,8] A rationale for this approach  
6  
7 is that human error is inevitable, so it is important to minimize the consequences of such errors.  
8  
9  
10 Bicycling facilities separated from motor vehicles minimize the likelihood of a collision and the  
11  
12 potential for severe injury when either a driver or a cyclist makes an error.  
13  
14

### 15 16 **Route Characteristics**

17  
18 Our main interest in this analysis was to determine whether route characteristics were associated  
19  
20 with increased or reduced injury severity. Route type, presence of an intersection, grade, and average  
21  
22 motor vehicle speed at the crash location were all associated with injury severity.  
23  
24

25  
26 In comparison to crashes on major streets without cycling infrastructure, crashes on sidewalks and  
27  
28 multi-use paths had considerably higher odds of ambulance transport (odds ratio for multi-use paths  
29  
30 not significant). Crashes on sidewalks and multi-use paths also had considerably higher odds of  
31  
32 hospital admission (odds ratio for sidewalks not significant). In our earlier analyses of crash risk,  
33  
34 multi-use paths and sidewalks had among the highest risks, despite being off-street.[17,18] The  
35  
36 increased severity after a crash adds to concern about these route types. Local streets (mainly  
37  
38 residential streets) were found to be a safe route type in our earlier analyses, with only about half the  
39  
40 risk of a crash.[17] The current analysis indicates that if a crash did occur, there was an increased  
41  
42 odds of one severity measure – hospitalization.  
43  
44  
45

46  
47 Few studies have examined route type and injury severity. De Rome *et al.* found that more severe  
48  
49 injuries were associated with crashes in traffic and on multi-use paths, and less severe with crashes in  
50  
51 bike lanes and on sidewalks.[25] Slaughter *et al.* found lower severity in bike lane crashes.[39] In  
52  
53 earlier analyses of our study, bicycle-specific infrastructure was found to have lower crash risk than  
54  
55 major streets without such infrastructure,[17] but the current analysis indicates that if a crash did  
56  
57  
58  
59  
60



1  
2  
3 occur, injury severity was similar. This may in part be because most of the injury sites with bicycle-  
4  
5 specific infrastructure in our study were bike lanes without physical separation from motor vehicles.  
6  
7

8 Intersection vs. non-intersection crash locations did not present a clear pattern of association with  
9  
10 severity in this study. Moore *et al.* found differing patterns of injury severity at intersections and non-  
11  
12 intersections.[31]  
13

14  
15 Downhill grade was significantly associated with increased severity for all metrics in unadjusted  
16  
17 analyses, and remained significant in the final model for ambulance transport. Three previous studies  
18  
19 have shown that injury severity is greater with grades.[23,24,31] Downhill grade is likely to be  
20  
21 associated with increased cyclist (and motor vehicle) speed, and therefore increased force of impact.  
22  
23 Our earlier analyses found that downhill slopes were associated with higher injury crash risk, and  
24  
25 that uphill grades deter cycling.[15,17,18] This suggests that, wherever possible, routing bicycle  
26  
27 facilities where slopes are gentle is a good strategy for both reducing injuries and motivating cycling.  
28  
29

30  
31 Higher average motor vehicle speed was associated with increased severity for all metrics, and  
32  
33 remained significant in the final model for ambulance transport. Other studies found higher speed  
34  
35 roads to be associated with greater injury severity to cyclists.[23,24,37] Our earlier analyses found  
36  
37 that injury crash risk was lower at intersections where motor vehicle speeds were 30 km/h or lower  
38  
39 and that routes with high vehicle speeds deter cycling.[15,18] This supports recent changes in some  
40  
41 European and North American cities to lower urban speed limits.  
42  
43  
44  
45

#### 46 47 **Trip Characteristics**

48  
49 Only one trip characteristic was associated with injury severity. Time of day (night riding) was  
50  
51 associated with a higher odds of hospital admission in unadjusted analyses and was elevated but not  
52  
53 significant in multiple regression. Night-time riding has been associated with increased injury  
54  
55 severity in other studies, especially where roadways were not lit.[24,29,32,33]  
56  
57  
58  
59  
60

1  
2  
3 Although much of the bicycle safety literature focuses on helmets and head injury mitigation,  
4 [22,37,40,41,42] helmet use was not associated with any of the severity metrics in this study. Both  
5  
6 biomechanical studies[42] and epidemiological studies[22,37,40,41] have demonstrated that helmets  
7  
8 can prevent serious skull and brain injuries. This study was not limited to head injuries, likely  
9  
10 contributing to our result that helmet use was not associated with injury severity. In one of the  
11  
12 largest studies to examine helmets, their use was found to significantly reduce head injuries, but was  
13  
14 not associated with serious injury mitigation across all body regions.[22,41] In this context, it is  
15  
16 important to recognize that cyclists may sustain injuries, including serious trauma, to any body part,  
17  
18 including their thorax, abdomen, neck and extremities.[22] A helmet can do nothing to prevent non-  
19  
20 head injuries. Our earlier analyses of crash risk show the potential for all injuries to be significantly  
21  
22 decreased for cyclists separated from motor vehicle traffic in a cycle track or a local street with  
23  
24 traffic diversion[17,18] and the present results show that injury severity significantly increases in a  
25  
26 collision with a motor vehicle. Together these results point to bicycle infrastructure that physically  
27  
28 separates cyclists from motor vehicle traffic to prevent trauma to any area of the body.  
29  
30  
31  
32  
33  
34

### 35 36 **Strengths and limitations**

37  
38 Strengths of the study include two study cities with differing climates, terrain, cycling mode shares  
39  
40 and cycling infrastructure, an urban-only cycling sample, the prospective accrual of subjects,  
41  
42 observation of route characteristics blinded to whether the site was an injury site, and the number of  
43  
44 clinical and cyclist self-report severity metrics.  
45  
46

47  
48 Study limitations include a relatively small sample of injured cyclists, restriction to Canadian cities  
49  
50 and lack of data on the anatomical location of the injury. As in all injury studies, only a portion of  
51  
52 injured cyclists were included; here, those whose injuries were serious enough to be treated at a  
53  
54 hospital emergency department, but not to cause death or a head injury so severe that the trip could  
55  
56  
57  
58  
59  
60

1  
2  
3 not be recalled. This reduced the pool of the most severely injured cases: 2 potential participants  
4 were fatally injured, 26 of those contacted could not remember their route, and 7 could not recall  
5 their crash circumstances. An unknown number of cyclists had injuries so minor that no emergency  
6 department visit was made.  
7  
8  
9  
10

11  
12  
13 Our overall **Bicyclists' Injuries and the Cycling Environment study** had a case-crossover design that  
14 **compared injury sites to control sites within a person-trip**, fully controlling for differences between  
15 individuals and trips that might confound the relationship between injury crash risk and  
16 infrastructure (the primary focus of the study). To examine severity of injuries in the current analysis,  
17 **the analysis compared participants with more severe injuries ("cases") to those with less severe**  
18 **injuries ("controls")**, introducing the potential for confounding by personal and trip characteristics.  
19  
20  
21  
22  
23  
24  
25  
26

27 We addressed this via adjustment in our regression models, but the potential for uncontrolled  
28 confounding by unmeasured characteristics remains.  
29  
30  
31

32 Given that we did not have data on more traditional measures of severity, the Abbreviated Injury  
33 Scale and Injury Severity Score, it is important to consider our outcome metrics, their relationship to  
34 each other and their potential reliability and validity as measures of severity. The four metrics  
35 measured different aspects of severity, as described above (Figure 1, Table 2).  
36  
37  
38  
39  
40  
41

42 Hospital admission is based on an in depth medical assessment and should reflect the most severe  
43 injuries. There are no standardized decision criteria, and physicians' decisions to admit emergency  
44 department patients to hospital have been found to differ substantially.[43] Data from Rivara *et al.*  
45 were available to compare hospitalization to Injury Severity Scores above *vs.* below 9.[22]  
46  
47  
48  
49  
50

51 Hospitalization had high specificity (0.94) but lower sensitivity (0.72), suggesting that few patients  
52 with minor injuries are admitted to hospital, but some who are severely injured are not admitted.  
53  
54

55 This could be because some patients with severe injuries (e.g., some extremity fractures, intra-  
56  
57  
58  
59  
60

1  
2  
3 abdominal trauma) may be treated and stabilized in an emergency department then discharged home,  
4  
5 but scheduled for later surgical repair. This may have contributed to our somewhat different results  
6  
7 for hospital admission and its lower correlations with the other metrics.  
8  
9

10 Ambulance transport is based, in part, on whether or not someone at the scene called an ambulance.  
11  
12 It had the strongest correlations with all other outcome metrics. Data from Lang *et al.* were available  
13  
14 to compare ambulance transport to Injury Severity Scores above *vs.* below 12.[44] Ambulance  
15  
16 transfer had low specificity (0.26) but high sensitivity (0.95), opposite to the pattern for  
17  
18 hospitalization. This suggests that most severely injured patients are transported by ambulance, but  
19  
20 so are many who are not severely injured.  
21  
22  
23

24  
25 The CTAS scale is based on assessment by a triage nurse of a standardized list of presenting  
26  
27 complaints, vital sign modifiers, and pain severity.[27] Certain injury mechanisms, e.g., being hit by a  
28  
29 motor vehicle, may be assigned a greater urgency score. CTAS has been frequently tested for  
30  
31 reliability, with kappas for agreement beyond chance spanning a broad range from 0.25 to 0.89.[28]  
32  
33 We found no comparison of CTAS to Injury Severity Scores. We found no validity or reliability data  
34  
35 for continuing to cycle.  
36  
37  
38  
39  
40  
41

## 42 CONCLUSIONS

43  
44  
45 In two of Canada's largest cities, approximately one-third of the bicycle crashes were collisions with  
46  
47 a motor vehicle and the resulting injuries were more severe than in other crash circumstances.  
48  
49 Certain route types (in particular multi-use paths and sidewalks), downhill grades, and higher motor  
50  
51 vehicle speeds were also associated with increased injury severity. These results suggest an urgent  
52  
53 need to provide bike facilities that separate cyclists from motor vehicle traffic, **that are not designed**  
54  
55  
56  
57  
58  
59  
60

1  
2  
3 for pedestrians, and that minimize slopes. These bicycle infrastructure modifications would reduce  
4  
5 both crashes and injury severity after a crash.  
6  
7  
8  
9

10  
11 **ACKNOWLEDGEMENTS:** We would like to thank all the study participants for generously  
12 contributing their time. We appreciate the work of study staff, hospital personnel and our city and  
13 community collaborators. This study evolved from work conducted in the University of British  
14 Columbia's Bridge Program Grant Development course (2005-2006) and benefitted from input  
15 from the participants of that class.  
16  
17  
18  
19  
20  
21  
22  
23

24 **CONTRIBUTORS:** KT, MAH, CCOR, and PC were responsible for initial conception and design  
25 of the study. KT, MAH, CCOR, PC, MW, SB, MC, MDC, JB, SMF, Garth Hunte and Kishore  
26 Mulpuri were responsible for the funding proposal. CCOR, MAH, MW, MDC, KT, Melody Monroe  
27 and Lee Vernich designed and tested data collection instruments. MW, HS and KT developed  
28 algorithms for defining route infrastructure. HS was responsible for data analyses. All authors had  
29 full access to the results of all analyses. PC, HS and KT drafted the article. All authors contributed to  
30 study design and implementation, analysis decisions, interpretation of results, and critical revision of  
31 the article. Evan Beaupré, Niki Blakely, Jill Dalton, Martin Kang, Kevin McCurley, and Andrew  
32 Thomas were responsible for interviews or site observations. Vartouji Jazmaji, Melody Monroe and  
33 Lee Vernich were responsible for supervision and training of study staff, and recruitment of  
34 participants. Barb Boychuk, Jan Buchanan, Doug Chisholm, Nada Elfeki, Garth Hunte, JB, SMF,  
35 and MDC contributed to identification of injured cyclists at the study hospitals. Jack Becker, Bonnie  
36 Fenton, David Hay, Nancy Smith Lea, Peter Sary, Fred Sztabinski, David Tomlinson, and Barbara  
37 Wentworth reviewed the study protocol, data collection forms, and infrastructure definitions from  
38  
39  
40  
41  
42  
43  
44  
45  
46  
47  
48  
49  
50  
51  
52  
53  
54  
55  
56  
57  
58  
59  
60

1  
2  
3 the perspective of professionals or advocates involved in cycling transportation. Data were double  
4 entered by Express Data Ltd.  
5  
6  
7

8  
9 **FUNDING:** This work was supported by a grant from the Heart and Stroke Foundation of Canada  
10 and the Canadian Institutes of Health Research (Institute of Musculoskeletal Health and Arthritis  
11 and Institute of Nutrition, Metabolism and Diabetes) (Grant number: BEO-85863). J. R. Brubacher,  
12 M.A. Harris, and M. Winters were supported by salary awards from the Michael Smith Foundation  
13 for Health Research. M. A. Harris, C. C. O. Reynolds, and M. Winters were supported by salary  
14 awards from the Canadian Institutes of Health Research.  
15  
16  
17  
18  
19  
20  
21

22  
23 **COMPETING INTERESTS:** None.  
24  
25

26 **PATIENT CONSENT:** Obtained  
27  
28

29  
30 **ETHICS APPROVAL:** The study methods were reviewed and approved by the human subjects  
31 ethics review boards of the University of British Columbia (BREB REB H06-03833), the University  
32 of Toronto (#22628), St. Paul's Hospital (BREB REB H06-03833), Vancouver General Hospital  
33 (#V07-0275), St. Michael's Hospital (REB 08-046C), and the University Health Network (Toronto  
34 General Hospital and Toronto Western Hospital; REB 07-0839-AE). All participants gave informed  
35 consent before taking part in the study.  
36  
37  
38  
39  
40  
41  
42

43 **DATA SHARING STATEMENT:** The study database was compiled from interviews with study  
44 participants and site observations by study personnel. It cannot be shared by the authors with  
45 anyone without approval from the University and Hospital human subjects review boards.  
46  
47  
48  
49  
50

## 51 52 53 54 **REFERENCES**

55  
56  
57  
58  
59  
60

1. Hamer M, Chida Y. Active commuting and cardiovascular risk: a meta-analytic review. *Prev Med* 2008;46(1):9–13
2. Wen LM, Rissel C. Inverse associations between cycling to work, public transport, and overweight and obesity: findings from a population based study in Australia. *Prev Med* 2008;46(1):29–32
3. Beck LF, Dellinger AM, O’Neil ME. Motor vehicle crash injury rates by mode of travel, United States: using exposure-based methods to quantify differences. *Am J Epidemiol* 2007;166(2):212–218
4. Teschke K, Harris MA, Reynolds CCO, *et al.* Exposure-based traffic crash injury rates by mode of travel in British Columbia. *Can J Public Health* 2013;104(1):e75–79
5. Parkin J. Comparisons of cycle use for the journey to work from the ’81, ’91 and 2001 censuses. *Traffic Eng Control* 2003;44(8):299-302
6. Pucher J, Buehler R. Making cycling irresistible: lessons from the Netherlands, Denmark and Germany. *Transp Rev* 2008;28(4):495–528
7. Pucher J, Buehler R, Seinen M. Bicycling renaissance in North America? An update and re-appraisal of cycling trends and policies. *Transp Res Part A Policy Pract* 2011;45(6):451-475
8. Jacobsen PL. Safety in numbers: more walkers and bicyclists, safer walking and bicycling. *Inj Prev* 2003;9(3):205–209.
9. NHTSA *Traffic Safety Facts 2010 Data. Bicyclists and other cyclists.* 2010
10. Transport Canada. *Canadian Motor Vehicle Traffic Collision Statistics: 2010.* 2013
11. Hamann C, Peek-Asa C. On-road bicycle facilities and bicycle crashes in Iowa, 2007–2010. *Accid Anal Prev* 2013;56:103–109
12. Canadian Institute for Health Information. *Cycling Injury Hospitalizations in Canada, 2009-2010.* 2012

- 1  
2  
3 13. Noland RB. Perceived risk and modal choice: risk compensation in transportation systems.  
4  
5 *Accid Anal Prev* 1995;27(4):503–521  
6
- 7  
8 14. Ogilvie D, Egan M, Hamilton V, *et al.* Promoting walking and cycling as an alternative to  
9  
10 using cars: systematic review. *BMJ* 2004;329(7469):763  
11
- 12  
13 15. Winters M, Brauer M, Setton EM, *et al.* Built environment influences on healthy  
14  
15 transportation choices: bicycling versus driving. *J Urban Health* 2010;87(6):969–993  
16
- 17  
18 16. Reynolds CC., Anne Harris M, Teschke K, *et al.* The impact of transportation infrastructure  
19  
20 on bicycling injuries and crashes: a review of the literature. *Environ Health* 2009;8(1):1–19  
21
- 22  
23 17. Teschke K, Harris MA, Reynolds CCO, *et al.* Route infrastructure and the risk of injuries to  
24  
25 bicyclists: A case-crossover study. *Am J Public Health* 2012;102(12):2336–2343  
26
- 27  
28 18. Harris MA, Reynolds CCO, Winters M, *et al.* Comparing the effects of infrastructure on  
29  
30 bicycling injury at intersections and non-intersections using a case-crossover design. *Inj Prev*  
31  
32 2013;19:303-310  
33
- 34  
35 19. Boström L, Nilsson B. A review of serious injuries and deaths from bicycle accidents in  
36  
37 Sweden from 1987 to 1994. *J Trauma* 2001;50(5):900–907  
38
- 39  
40 20. Chong S, Poulos R, Olivier J, *et al.* Relative injury severity among vulnerable non-motorised  
41  
42 road users: comparative analysis of injury arising from bicycle-motor vehicle and bicycle-  
43  
44 pedestrian collisions. *Accid Anal Prev* 2010;42(1):290–296  
45
- 46  
47 21. Heesch KC, Garrard J, Sahlqvist S. Incidence, severity and correlates of bicycling injuries in  
48  
49 a sample of cyclists in Queensland, Australia. *Accid Anal Prev* 2011;43(6):2085–2092  
50
- 51  
52 22. Rivara FP, Thompson DC, Thompson RS. Epidemiology of bicycle injuries and risk factors  
53  
54 for serious injury. *Inj Prev* 1997;3(2):110–114  
55
- 56  
57 23. Allen-Munley C, Daniel J, Dhar S. Logistic model for rating urban bicycle route safety.  
58  
59 *Transp Res Rec* 2004;1878(-1):107–115  
60



- 1
- 2
- 3
- 4 24. Klop J, Khattak A. Factors influencing bicycle crash severity on two-lane, undivided
- 5 roadways in North Carolina. *Transp Res Rec* 1999;1674(-1):78–85
- 6
- 7
- 8 25. De Rome L, Boufous S, Georgeson T, *et al.* Bicycle crashes in different riding environments
- 9 in the Australian capital territory. *Traffic Inj Prev* 2014;15(1):81–88
- 10
- 11
- 12 26. Harris MA, Reynolds CCO, Winters M, *et al.* The Bicyclists' Injuries and the Cycling
- 13 Environment study: a protocol to tackle methodological issues facing studies of bicycling
- 14 safety. *Inj Prev* 2011.
- 15
- 16
- 17
- 18
- 19 27. Bullard MJ, Under B, Spence J, *et al.* Revisions to the Canadian Emergency department
- 20 Triage and Acuity Scale (CTAS) adult guidelines. *CJEM* 2008;10:136-142
- 21
- 22
- 23 28. Christ M, Grossman F, Winter D, *et al.* Modern triage in the emergency department. *Dtsch*
- 24 *Arztebl Int* 2010;107:892-898
- 25
- 26
- 27
- 28
- 29 29. Kim J-K, Kim S, Ulfarsson GF, *et al.* Bicyclist injury severities in bicycle-motor vehicle
- 30 accidents. *Accid Anal Prev* 2007;39(2):238–251
- 31
- 32
- 33 30. Lustenberger T, Inaba K, Talving P, *et al.* Bicyclists injured by automobiles: relationship of
- 34 age to injury type and severity--a national trauma databank analysis. *J Trauma*
- 35 2010;69(5):1120–1125
- 36
- 37
- 38
- 39 31. Moore DN, Schneider WH, Savolainen PT, *et al.* Mixed logit analysis of bicyclist injury
- 40 severity resulting from motor vehicle crashes at intersection and non-intersection locations.
- 41 *Accid Anal Prev* 2011;43(3):621–630
- 42
- 43
- 44
- 45 32. Rifaat SM, Tay R, de Barros A. Effect of street pattern on the severity of crashes involving
- 46 vulnerable road users. *Accid Anal Prev* 2011;43(1):276–283
- 47
- 48
- 49
- 50 33. Yan X, Ma M, Huang H, *et al.* Motor vehicle–bicycle crashes in Beijing: Irregular maneuvers,
- 51 crash patterns, and injury severity. *Accid Anal Prev* 2011;43(5):1751–1758
- 52
- 53
- 54
- 55
- 56
- 57
- 58
- 59
- 60

- 1  
2  
3  
4  
5  
6  
7  
8  
9  
10  
11  
12  
13  
14  
15  
16  
17  
18  
19  
20  
21  
22  
23  
24  
25  
26  
27  
28  
29  
30  
31  
32  
33  
34  
35  
36  
37  
38  
39  
40  
41  
42  
43  
44  
45  
46  
47  
48  
49  
50  
51  
52  
53  
54  
55  
56  
57  
58  
59  
60
34. Begg DJ, Langley JD, Stephenson S. Identifying factors that predict persistent driving after drinking, unsafe driving after drinking, and driving after using cannabis among young adults. *Accid Anal Prev* 2003;35(5):669–675
35. Nieves JW, Formica C, Ruffing J, *et al.* Males have larger skeletal size and bone mass than females, despite comparable body size. *J Bone Miner Res* 2005;20(3):529–535
36. Wu C, Yao L, Zhang K. The red-light running behavior of electric bike riders and cyclists at urban intersections in China: an observational study. *Accid Anal Prev* 2012;49:186–192
37. Bambach MR, Mitchell RJ, Grzebieta RH, *et al.* The effectiveness of helmets in bicycle collisions with motor vehicles: A case-control study. *Accid Anal Prev* 2013;53:78–88
38. Teschke K, Frendo T, Shen H, *et al.* Do bicycling crash circumstances vary by route type? A cross-sectional study. *BMC Public Health* 2014, submitted
39. Slaughter DR, Williams N, Wall SP, *et al.* A community traffic safety analysis of pedestrian and bicyclist injuries based on the catchment area of a trauma center. *J Trauma Acute Care Surg* 2014;76(4):1103–1110
40. Elvik R. Publication bias and time-trend bias in meta-analysis of bicycle helmet efficacy: A re-analysis of Attewell, Glase and McFadden, 2001. *Accid Anal Prev* 2011;43(3):1245–1251
41. Thompson DC, Rivara FP, Thompson RS. Effectiveness of bicycle safety helmets in preventing head injuries. A case-control study. *JAMA* 1996;276(24):1968–1973
42. Cripton PA, Dressler DM, Stuart CA, *et al.* Bicycle helmets are highly effective at preventing head injury during head impact: Head-form accelerations and injury criteria for helmeted and unhelmeted impacts. *Accid Anal Prev* 2014;70:1–7
43. Mutrie D, Bailey SK, Malik S. Individual emergency physician admission rates: predictably unpredictable. *CJEM* 2009;11:149-155

1  
2  
3  
4  
5  
6  
7  
8  
9  
10  
11  
12  
13  
14  
15  
16  
17  
18  
19  
20  
21  
22  
23  
24  
25  
26  
27  
28  
29  
30  
31  
32  
33  
34  
35  
36  
37  
38  
39  
40  
41  
42  
43  
44  
45  
46  
47  
48  
49  
50  
51  
52  
53  
54  
55  
56  
57  
58  
59  
60

44. Lang J, Dallow N, Lang A, *et al.* Inclusion of minor trauma cases provides a better estimate of the total burden of injury: Queensland Trauma Registry provides a unique perspective.

*Injury* 2014;45:1236-1241

For peer review only

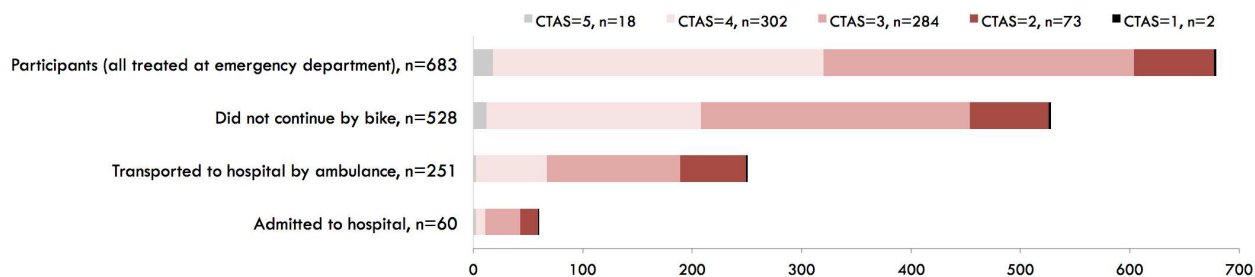

**Figure 1.** Metrics of severity of cycling injuries to 683 study participants, stratified by CTAS. CTAS = Canadian Triage and Acuity Scale, where 5 is the least medically urgent and 1 is the most.

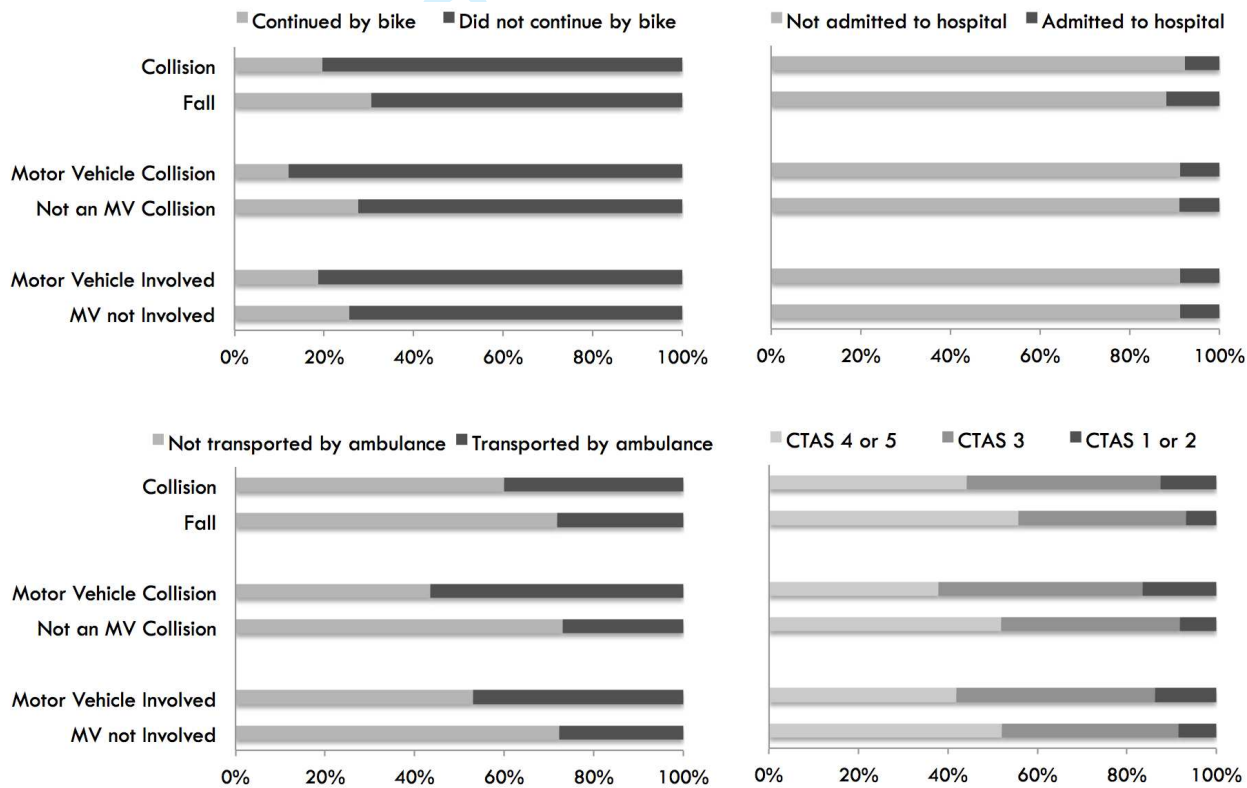

**Figure 2.** Crash circumstances vs. metrics of severity.

Collisions could be with a motor vehicle, obstacle, surface feature, cyclist, pedestrian, or animal. Motor vehicle “involved” includes both direct collisions with vehicles and crashes resulting from manoeuvres to avoid a motor vehicle.

1  
2  
3  
4  
5  
6  
7  
8  
9  
10  
11  
12  
13  
14  
15  
16  
17  
18  
19  
20  
21  
22  
23  
24  
25  
26  
27  
28  
29  
30  
31  
32  
33  
34  
35  
36  
37  
38  
39  
40  
41  
42  
43  
44  
45  
46  
47  
48  
49  
50  
51  
52  
53  
54  
55  
56  
57  
58  
59  
60

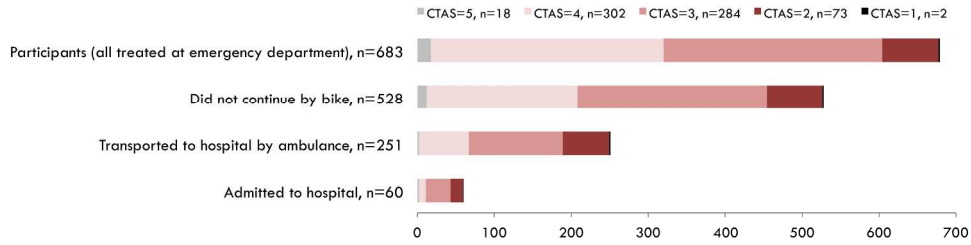

Figure 1. Metrics of severity of cycling injuries to 683 study participants, stratified by CTAS. CTAS = Canadian Triage and Acuity Scale, where 5 is the least medically urgent and 1 is the most.

1057x793mm (72 x 72 DPI)

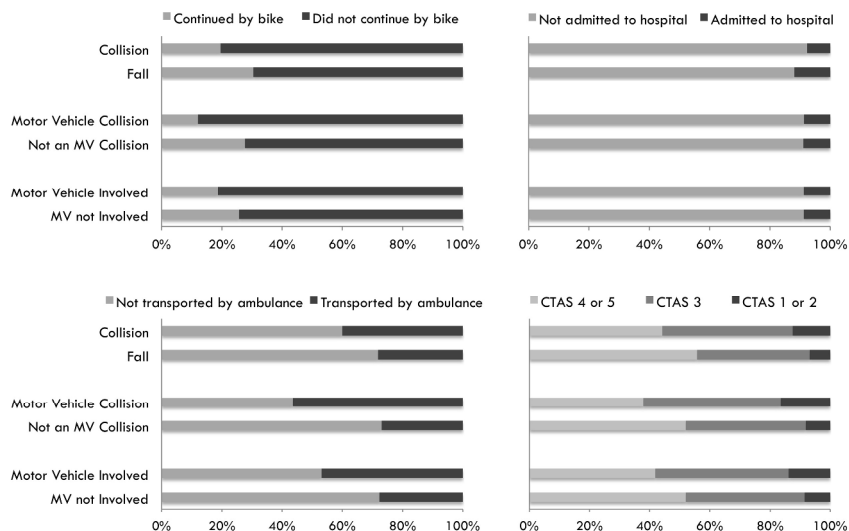

Figure 2. Crash circumstances vs. metrics of severity. Collisions could be with a motor vehicle, obstacle, surface feature, cyclist, pedestrian, or animal. Motor vehicle "involved" includes both direct collisions with vehicles and crashes resulting from manoeuvres to avoid a motor vehicle.

1057x793mm (72 x 72 DPI)

# BMJ Open

## Severity of urban cycling injuries and the relationship with personal, trip, route and crash characteristics: Analyses using four severity metrics

|                                 |                                                                                                                                                                                                                                                                                                                                                                                                                                                                                                                                                                                                                                                                                                                                                                                                                                                               |
|---------------------------------|---------------------------------------------------------------------------------------------------------------------------------------------------------------------------------------------------------------------------------------------------------------------------------------------------------------------------------------------------------------------------------------------------------------------------------------------------------------------------------------------------------------------------------------------------------------------------------------------------------------------------------------------------------------------------------------------------------------------------------------------------------------------------------------------------------------------------------------------------------------|
| Journal:                        | <i>BMJ Open</i>                                                                                                                                                                                                                                                                                                                                                                                                                                                                                                                                                                                                                                                                                                                                                                                                                                               |
| Manuscript ID:                  | bmjopen-2014-006654.R2                                                                                                                                                                                                                                                                                                                                                                                                                                                                                                                                                                                                                                                                                                                                                                                                                                        |
| Article Type:                   | Research                                                                                                                                                                                                                                                                                                                                                                                                                                                                                                                                                                                                                                                                                                                                                                                                                                                      |
| Date Submitted by the Author:   | 26-Nov-2014                                                                                                                                                                                                                                                                                                                                                                                                                                                                                                                                                                                                                                                                                                                                                                                                                                                   |
| Complete List of Authors:       | Cripton, Peter; University of British Columbia, Mechanical Engineering<br>Shen, Hui; University of British Columbia, School of Population and Public Health<br>Brubacher, Jeffrey; University of British Columbia, Emergency Medicine<br>Chipman, Mary; University of Toronto, Dalla Lana School of Public Health<br>Friedman, Steven; University Health Network,<br>Harris, Anne; Ryerson University, School of Occupational and Public Health<br>Winters, Meghan; Simon Fraser University, Faculty of Health Sciences<br>Reynolds, Conor; University of British Columbia, Institute for Resources, Environment and Sustainability<br>Cusimano, Michael; St. Michael's Hospital, University of Toronto,<br>Babul, Shelina; Uiversity of British Columbia, Pediatrics<br>Teschke, Kay; University of British Columbia, School of Population and Public Health |
| <b>Primary Subject Heading</b>: | Emergency medicine                                                                                                                                                                                                                                                                                                                                                                                                                                                                                                                                                                                                                                                                                                                                                                                                                                            |
| Secondary Subject Heading:      | Sports and exercise medicine                                                                                                                                                                                                                                                                                                                                                                                                                                                                                                                                                                                                                                                                                                                                                                                                                                  |
| Keywords:                       | EPIDEMIOLOGY, ACCIDENT & EMERGENCY MEDICINE, PUBLIC HEALTH                                                                                                                                                                                                                                                                                                                                                                                                                                                                                                                                                                                                                                                                                                                                                                                                    |
|                                 |                                                                                                                                                                                                                                                                                                                                                                                                                                                                                                                                                                                                                                                                                                                                                                                                                                                               |

SCHOLARONE™  
Manuscripts

1  
2  
3  
4 **Severity of urban cycling injuries and the relationship with personal, trip, route and crash**  
5 **characteristics: Analyses using four severity metrics**  
6  
7  
8  
9  
10

11 Peter A. Cripton<sup>1</sup>, Hui Shen<sup>2</sup>, Jeff R. Brubacher<sup>3</sup>, Mary Chipman<sup>4</sup>, Steven M. Friedman<sup>5,6</sup>, M. Anne  
12 Harris<sup>7</sup>, Meghan Winters<sup>8</sup>, Conor C.O. Reynolds<sup>9</sup>, Michael D. Cusimano<sup>10,11</sup>, Shelina Babul<sup>12</sup>, Kay  
13  
14  
15  
16  
17  
18  
19  
20  
21  
22  
23  
24  
25  
26  
27  
28  
29  
30  
31  
32  
33  
34  
35  
36  
37  
38  
39  
40  
41  
42  
43  
44  
45  
46  
47  
48  
49  
50  
51  
52  
53  
54  
55  
56  
57  
58  
59  
60

Teschke<sup>2,\*</sup>

\* Corresponding author

School of Population and Public Health, University of British Columbia, 2206 East Mall,  
Vancouver, BC, Canada, V6T 1Z3

[kay.teschke@ubc.ca](mailto:kay.teschke@ubc.ca)

604 822-2041

<sup>1</sup>Department of Mechanical Engineering, University of British Columbia, Vancouver, Canada

<sup>2</sup>School of Population and Public Health, University of British Columbia, Vancouver, Canada

<sup>3</sup>Department of Emergency Medicine, University of British Columbia, Vancouver, Canada

<sup>4</sup>Dalla Lana School of Public Health, University of Toronto, Toronto, Canada

<sup>5</sup>Faculty of Medicine, University of Toronto, Toronto, Canada

<sup>6</sup>University Health Network, Toronto, Canada

<sup>7</sup>School of Occupational and Public Health, Ryerson University, Toronto, Canada

<sup>8</sup>Faculty of Health Sciences, Simon Fraser University, Burnaby, Canada



1  
2  
3 <sup>9</sup>Institute for Resources, Environment and Sustainability, University of British Columbia,  
4  
5 Vancouver, Canada  
6  
7

8  
9 <sup>10</sup>Division of Neurosurgery and Injury Prevention Research Office, Keenan Research Centre, St.  
10  
11 Michael's Hospital, Toronto, Canada  
12  
13

14 <sup>11</sup>Departments of Surgery and Education and Public Health, University of Toronto, Toronto,  
15  
16 Canada  
17  
18

19 <sup>12</sup>Department of Pediatrics, University of British Columbia, Vancouver, Canada  
20  
21  
22  
23  
24  
25

26 Abstract word count: 291  
27  
28

29 Article word count: 4040 (excluding acknowledgements)  
30  
31  
32  
33  
34  
35

36 Key words: Bicycle; injury severity; bike lanes; epidemiology  
37  
38  
39  
40  
41  
42  
43  
44  
45  
46  
47  
48  
49  
50  
51  
52  
53  
54  
55  
56  
57  
58  
59  
60

**ABSTRACT**

**Objective:** To examine the relationship between cycling injury severity and personal, trip, route and crash characteristics.

**Methods:** Data from a previous study of injury risk, conducted in Toronto and Vancouver, Canada, were used to classify injury severity using four metrics: 1) did not continue trip by bike; 2) transported to hospital by ambulance; 3) admitted to hospital; and 4) Canadian Triage and Acuity Scale (CTAS). Multiple logistic regression was used to examine associations with personal, trip, route and crash characteristics.

**Results:** Of 683 adults injured while cycling, 528 did not continue their trip by bike, 251 were transported by ambulance, and 60 were admitted to hospital for further treatment. Treatment urgencies included 75 as CTAS=1 or 2 (most medically urgent), 284 as CTAS=3, and 320 as CTAS=4 or 5 (least medically urgent). Older age and collision with a motor vehicle were consistently associated with increased severity in all four metrics and statistically significant in three each (both variables with ambulance transport and CTAS; age with hospital admission; and motor vehicle collision with did not continue by bike). Other factors were consistently associated with more severe injuries, but statistically significant in one metric each: downhill grades; higher motor vehicle speeds; multi-use paths (these significant for ambulance transport); sidewalks; and local streets (both significant for hospital admission).

**Conclusions:** In two of Canada's largest cities, about one-third of the bicycle crashes were collisions with motor vehicles and the resulting injuries were more severe than in other crash circumstances, underscoring the importance of separating cyclists from motor vehicle traffic. Our results also suggest that both bicycling injury severity and injury risk would be reduced on facilities that

1  
2  
3 minimize slopes, have lower vehicle speeds, and that are designed for bicycling rather than shared  
4  
5 with pedestrians.  
6  
7

### 8 9 **Strengths and Limitations of this Study**

- 10  
11  
12
- 13 • This study is one of few to examine the relationship between route characteristics and  
14 severity of bicycling injuries. Its major strength was use of data from a study of bicycling  
15 injury risk. This made it possible to consider whether route characteristics that increased  
16 injury risk were similar to or different from those that increased bicycling injury severity.  
17  
18
  - 19 • The results show that facilities that separate cyclists from motor vehicle traffic and  
20 pedestrians, minimize slopes, and lower motor vehicle speeds would reduce both injury  
21 severity after a crash and reduce injury risk.  
22  
23
  - 24 • The analyses examined four metrics covering different aspects of injury severity (not able to  
25 continue the trip by bike, transport to hospital by ambulance, admission to hospital, and  
26 treatment urgency) and identified factors that were consistently associated with increased  
27 severity: increased age and collision with a motor vehicle.  
28  
29
  - 30 • The study included a range of injury severities resulting in emergency treatment at a hospital  
31 but did not include those so severely injured they could not remember their trip, nor those  
32 with such minor injuries that emergency treatment was not required.  
33  
34
  - 35 • The influence of route characteristics on severity was adjusted for potential confounding by  
36 personal and trip characteristics in the regression models, but the potential for uncontrolled  
37 confounding by unmeasured characteristics remains.  
38  
39  
40  
41  
42  
43  
44  
45  
46  
47  
48  
49  
50  
51  
52  
53  
54  
55  
56  
57  
58  
59  
60

## INTRODUCTION

Cycling is used for transportation and is a popular recreational activity. Its health benefits are clear, [1,2] in contrast to motor vehicle travel. Transportation cycling has risks in the same order of magnitude as driving and walking in the US and Canada.[3,4] However injury and fatality risks are higher than in some European countries where cycling participation is much higher.[5-8]

In 2010, there were 618 cyclist traffic deaths in the United States and 60 in Canada.[9,10] Broader data (including bicycling sports such as mountain biking) indicate that about 27,800 Americans and 4,300 Canadians were hospitalized for cycling injuries in 2009.[11,12] Although bicycling injuries are a small proportion of all traffic injuries and deaths in North America (~2 to 4%),[9,10] reducing their incidence is important because of the direct harm that they do and because they deter potential cyclists.[13-15]

The reason postulated for the inversion of cycling activity and injury risk between North America and Europe is the well-designed bicycle-specific infrastructure in Europe vs. its relative paucity in North America. We reviewed published studies and found that bicycle-specific infrastructure was associated with decreased injury risk, but a small range of infrastructure had been studied, often with uncertain control of exposure.[16] We subsequently conducted a case-crossover study of the association between route infrastructure and injury risk.[17,18] It found that infrastructure that was bicycle-specific (e.g., cycle tracks separated from traffic, bike lanes) or “bicycle-friendly” (e.g., local streets with traffic diversion) had considerably lower injury risk. Other features were found to increase injury risk: streetcar or train tracks, downhill grades, construction, major street intersections, and traffic circles at local street intersections. This work was designed to estimate associations with injury risk, with a no-injury control.

1  
2  
3 An alternative line of inquiry is what factors are associated with injury severity, among those who  
4 have been injured. Many studies have found that collisions with motor vehicles increase cyclist injury  
5 severity.[11,19-22] However few authors have examined severity with respect to route  
6  
7  
8 infrastructure.[23-25] Higher severity has been found with grades, higher speed roads, and crashes in  
9  
10 traffic or on shared paths.[23-25] Although these results suggest that predictors of cycling injury risk  
11  
12 may be similar to predictors of injury severity, this is not established, and our study offers the  
13  
14 opportunity to examine both sets of outcomes, adding a level of context requested by policy makers,  
15  
16 infrastructure designers and other stakeholders. In our opinion, injury severity, not just the fact of  
17  
18 an injury, is a second and equally important criterion used by the lay public to evaluate the apparent  
19  
20 safety of cycling.  
21  
22  
23  
24  
25  
26

27 Therefore we conducted additional analyses of data from our previous case-crossover study [17,18]  
28  
29 to examine the relationship between injury severity and personal, trip, route and crash characteristics.  
30  
31  
32  
33  
34

## 35 **METHODS**

36  
37 Details about overall study conduct and reliability testing are described elsewhere [17,26]; methods  
38  
39 related to the analyses presented here are described below. The study population consisted of adult  
40  
41 ( $\geq 19$  years) residents of Toronto and Vancouver who were injured while riding a bicycle in the city  
42  
43 and treated within 24 hours in the emergency departments of the following hospitals between May  
44  
45 18, 2008 and November 30, 2009: St. Paul's or Vancouver General in Vancouver; St. Michael's,  
46  
47 Toronto General or Toronto Western in Toronto. Injured cyclists were identified by research staff  
48  
49 at each hospital who relayed contact information to the study co-ordinators. Introductory letters  
50  
51 were sent to all potential participants, followed by a phone call from the study co-ordinator to invite  
52  
53 participation and screen for eligibility. Those who were fatally injured or so severely injured that they  
54  
55  
56  
57  
58  
59  
60

1  
2  
3 were unable to remember their trip were not included, nor were those injured during mountain  
4  
5 biking, trick riding, or racing.  
6  
7

8 Data on characteristics related to severity were abstracted from emergency department records. In  
9  
10 addition, eligible participants were interviewed in person by trained interviewers about personal  
11  
12 characteristics, trip characteristics, and crash circumstances, using a structured questionnaire  
13  
14 (<http://cyclingincities.spph.ubc.ca/files/2011/10/InterviewFormFinal.pdf>).  
15  
16

17 The study was not designed to focus on severity, so the data did not include classical severity scoring  
18  
19 using the Abbreviated Injury Scale. However we did have access to four indicators of severity:  
20  
21

- 22 1. Whether the subject continued their trip by bicycle (self-reported in the interview), no vs. yes
- 23 2. Whether the subject was transported by ambulance (hospital data), yes vs. no
- 24 3. Whether the subject was admitted to hospital (hospital data), yes vs. no
- 25 4. Canadian Triage and Acuity Scale (CTAS) (hospital data), levels 1 to 5, defined as

26 follows:[27,28]

- 27 • 1 – Resuscitation; need to be seen immediately
- 28 • 2 – Emergent; need to be seen within 15 minutes
- 29 • 3 – Urgent; need to be seen within 30 minutes
- 30 • 4 – Less urgent; need to be seen within 60 minutes
- 31 • 5 – Non urgent, need to be seen within 120 minutes

32  
33  
34  
35  
36  
37  
38  
39  
40  
41  
42  
43  
44  
45  
46  
47 The relationship between these severity metrics was examined descriptively using cross-tabulations  
48  
49 and Pearson correlation coefficients.  
50

51  
52 Site observations were made to document characteristics of injury and control sites, and allow route  
53  
54 infrastructure classification.[17,18] The observations were made blind to whether an injury took  
55  
56 place at the site or not. In the current analyses, only the injury site data was used.  
57  
58  
59  
60

1  
2  
3 Unconditional logistic regression was used to examine associations of each of the following  
4  
5 independent variables with each severity outcome metric:  
6  
7

- 8 • personal characteristics: sex; age; how frequently he/she cycled; whether the cyclist  
9 considered himself/herself experienced, had taken a cycling training course, had a driver's  
10 license  
11  
12
- 13 • trip characteristics: time of day; weather; helmet use; use of visible clothing on the trunk;  
14  
15 whether bike lights were turned on; alcohol and drug use in the 6 hours prior  
16  
17
- 18 • route characteristics at the injury site: type of route; intersection location; presence of bike  
19  
20 signage; junctions; construction; streetcar tracks; grade; average vehicle speed; distance  
21  
22 visible along route.  
23  
24
- 25 • crash circumstances: collision (with a motor vehicle, obstacle, surface feature, cyclist,  
26  
27 pedestrian, or animal) vs. fall; collision with a motor vehicle vs. not; motor vehicle  
28  
29 "involvement" (i.e., both direct collisions with vehicles and crashes resulting from motor  
30  
31 vehicle avoidance manoeuvres) vs. not. No data on fault in the crash was collected.  
32  
33  
34  
35

36 All independent variables significant at  $p < 0.05$  in simple logistic regression (unadjusted analysis) of  
37  
38 any severity metric were included in multiple regression models for all four severity metrics. The  
39  
40 rationale for this broad inclusion of variables in the final models was to maximize control of  
41  
42 potential confounding by personal and trip characteristics, to allow comparison of results across  
43  
44 severity metrics, and to ensure that characteristics previously shown to be consistently related to  
45  
46 injury severity were included in all the models (i.e., age, crash circumstance).  
47  
48

49 For dichotomous severity metrics (did not continue by bike *vs.* did, ambulance transport *vs.* not,  
50  
51 admitted to hospital *vs.* not), traditional logistic regression was used. For CTAS, ordinal logistic  
52  
53 regression modeled the odds of a more urgent CTAS group, after verifying that the proportional  
54  
55  
56  
57  
58  
59  
60

1  
2  
3 odds assumption was valid. CTAS categories were grouped as follows: most urgent, levels 1 or 2;  
4  
5 moderate urgency, 3; least urgency, 4 or 5.  
6  
7

8 Additional analyses were conducted to evaluate the models. Analyses were run without the motor  
9 vehicle collision variable and, separately, without the route type variable to determine whether either  
10 vehicle collision variable and, separately, without the route type variable to determine whether either  
11 changed the relationship of the other to severity in the full models. Separate analyses were  
12 conducted for motor vehicle collisions and other collisions to determine whether there was  
13 interaction between the motor vehicle collision and route type variables.  
14  
15  
16  
17  
18  
19  
20  
21  
22

## 23 RESULTS

24  
25  
26 The study included 690 injured cyclists (414 in Vancouver, 276 in Toronto). Seven were unable to  
27 recall their crash circumstances, so were removed from analyses; none of these continued by bike,  
28 six were transported by ambulance, their CTAS scores were either 1 or 2, and one was admitted to  
29 hospital. After these subjects were excluded, 683 subjects remained for most analyses, though four  
30 additional subjects did not have information on CTAS or ambulance transport.  
31  
32  
33  
34  
35  
36  
37

38 Descriptive data about the study participants, the trips when their injuries occurred, the  
39 characteristics of the route at the injury site, and the crash circumstances are presented in Table 1.  
40 Most participants were men, young, and regular cyclists. Most wore a helmet, but few wore bright  
41 clothing or used bike lights. Most of the injury sites were on major or local streets with little or no  
42 cycling infrastructure and most were at non-intersection locations. A minority of injuries occurred at  
43 sites with bike-specific infrastructure.  
44  
45  
46  
47  
48  
49  
50  
51

52 Most of the crashes were collisions (74%, n=506) rather than falls. Direct collisions with motor  
53 vehicles (34%, n=231) were the most frequent collision type. Crashes “involving” motor vehicles  
54 (48%, n=330) included direct collisions, as well as crashes to avoid motor vehicle collisions (14%,  
55  
56  
57  
58  
59  
60



n=99). Few collisions involved other cyclists (3%, n=22), pedestrians (2%, n=12) or animals (1%, n=6).

**Table 1.** Personal characteristics of the cyclists, characteristics of the trip when the injury occurred, characteristics of the route at the site where the injury occurred, and crash circumstances (N=683)

|                                                                                                                                                 | N (%)     |
|-------------------------------------------------------------------------------------------------------------------------------------------------|-----------|
| Personal characteristics                                                                                                                        |           |
| Male                                                                                                                                            | 404 (59%) |
| Age                                                                                                                                             |           |
| 19 to 29                                                                                                                                        | 262 (39%) |
| 30 to 39                                                                                                                                        | 167 (25%) |
| 40 to 49                                                                                                                                        | 115 (17%) |
| 50 to 59                                                                                                                                        | 81 (12%)  |
| ≥ 60                                                                                                                                            | 55 (8.1%) |
| Regular cyclist (cycled ≥ 52 times per year)                                                                                                    | 602 (88%) |
| Had a driver's license                                                                                                                          | 613 (90%) |
| Considered themselves experienced                                                                                                               | 637 (93%) |
| Had taken a cycling training course                                                                                                             | 42 (6.1%) |
| Trip characteristics                                                                                                                            |           |
| Time of day                                                                                                                                     |           |
| Day                                                                                                                                             | 530 (78%) |
| Dawn or dusk                                                                                                                                    | 50 (7.3%) |
| Night                                                                                                                                           | 103 (15%) |
| Clear weather                                                                                                                                   | 473 (69%) |
| Helmet worn                                                                                                                                     | 472 (69%) |
| Bright clothing worn                                                                                                                            | 228 (33%) |
| Bike lights turned on                                                                                                                           | 133 (19%) |
| Alcohol consumed in previous 6 h                                                                                                                | 70 (10%)  |
| Drugs consumed in previous 6 h                                                                                                                  | 78 (11%)  |
| Route characteristics at the injury sites                                                                                                       |           |
| Route types                                                                                                                                     |           |
| Major streets (arterials and collectors, most with no bicycle infrastructure, a few with shared lanes, n=22)                                    | 289 (42%) |
| Local streets (mainly residential, many designated as bikeways, n=99)                                                                           | 187 (27%) |
| Sidewalks                                                                                                                                       | 52 (7.6%) |
| Multi-use paths (designated for pedestrian and bicyclists)                                                                                      | 73 (11%)  |
| Bicycle-specific infrastructure (bike lanes on major streets, n=59; cycle tracks alongside major streets, n=2; and off-street bike paths, n=21) | 82 (12%)  |
| At an intersection                                                                                                                              | 211 (31%) |
| Junctions in last 100 m                                                                                                                         | 593 (87%) |
| Bike signage present                                                                                                                            | 76 (11%)  |
| Construction present                                                                                                                            | 85 (12%)  |
| Streetcar or train tracks present                                                                                                               | 149 (22%) |
| Downhill grade                                                                                                                                  | 329 (48%) |
| Average vehicle speed > 30 km/h                                                                                                                 | 363 (53%) |
| Forward distance visible < 20 m                                                                                                                 | 12 (1.8%) |
| Crash circumstances                                                                                                                             |           |
| Collision with motor vehicle                                                                                                                    | 231 (34%) |
| Collision with streetcar or train tracks                                                                                                        | 97 (14%)  |
| Collision with other surface features (e.g., pothole, rock, roots, leaves, ice)                                                                 | 69 (10%)  |
| Collision with obstacle (e.g., post, curb, planter, lane divider)                                                                               | 69 (10%)  |
| Collision with cyclist, pedestrian, animal                                                                                                      | 40 (5.9%) |
| Falls                                                                                                                                           | 177 (26%) |

Figure 1 shows the distribution of subjects by the severity metrics, stratified by CTAS. The most urgent CTAS scores (1 or 2, n=75) were assigned to 11% of all subjects, 14% of those who did not continue by bike, 25% of those transported by ambulance and 28% of those who were admitted to hospital. Table 2 provides additional detail on the relationship between the metrics. Of the 251 subjects transported to hospital by ambulance, 99% did not continue by bike. Of the 60 subjects admitted to hospital, 100% did not continue by bike, and 75% were transported by ambulance. Pearson correlations show associations in the expected directions, but the correlations were not strong. Thus the four metrics had logical relationships to each other, but did not measure identical constructs.

**Table 2.** Relationship between the four metrics of severity: Pearson correlation coefficients above the diagonal; numbers of subjects below the diagonal.

|                                              | Did not<br>continue<br>by bike | Transported<br>to hospital by<br>ambulance | Admitted to<br>hospital | CTAS* |
|----------------------------------------------|--------------------------------|--------------------------------------------|-------------------------|-------|
| Did not continue by bike (n=528)             | –                              | 0.40                                       | 0.17                    | -0.29 |
| Transported to hospital by ambulance (n=251) | 249                            | –                                          | 0.24                    | -0.39 |
| Admitted to hospital (n=60)                  | 60                             | 45                                         | –                       | -0.20 |
| CTAS = 1 or 2 (n=75)                         | 74                             | 62                                         | 17                      | –     |

\* Correlations with CTAS were negative because the scale was in the opposite direction, with 1 = most urgent and 5 = least urgent. All other metrics were assigned 1 = more vs. 0 = less severe.

Figure 2 shows the severity metrics against crash circumstances, classified three ways. Collisions tended to be more severe than falls, and crashes “involving” motor vehicles tended to be more severe than those not. Direct collisions with motor vehicles had the highest proportion in the more severe category of every metric except admitted to hospital. In unadjusted analyses, collision (of any type) and motor vehicle “involvement” both had elevated odds ratios for the same severity metrics as motor vehicle collision (data not shown), but the odds ratios were lower, indicating that it was direct collision with a motor vehicle that led to increased severity. Only the motor vehicle collision variable was included in multiple regression models.

1  
2  
3 Table 3 shows the results of the multiple logistic regression models for each severity metric,  
4 including all independent variables statistically significant in at least one unadjusted analysis. Four  
5 personal characteristic variables were included: age, sex, cycling experience, and cycling frequency.  
6  
7 Age showed consistent associations across all severity metrics; older age groups had more severe  
8 injuries, significantly so for ambulance transport, admission to hospital and CTAS. Women were  
9 significantly more likely to stop their trip by bike than men. There was a tendency for more  
10 experienced and more regular cyclists to have higher injury severity, though only one association was  
11 statistically significant in multiple regression.  
12  
13  
14  
15  
16  
17  
18  
19  
20  
21

22 Cyclists whose crash was a direct collision with a motor vehicle had elevated odds ratios for all  
23 severity metrics, statistically significant for not continuing by bike, being transported by ambulance  
24 and more urgent triage score (CTAS). Those whose crashes were on multi-use paths, sidewalks and  
25 local streets tended to have more severe injuries than those who crashed on major streets; significant  
26 associations were observed for certain associations with ambulance transport and hospital admission.  
27  
28 Crashes at intersections had inconsistent results; the only significant odds ratio indicated that those  
29 injured at an intersection were less likely to stop their trip by bike. Downhill grades were consistently  
30 related to greater injury severity, significantly so for transportation by ambulance. The same pattern  
31 was observed for higher average motor vehicle speeds at the crash location. Time of day and  
32 presence of streetcar tracks were both significant in some unadjusted analyses, but did not remain so  
33 in multiple regression.  
34  
35  
36  
37  
38  
39  
40  
41  
42  
43  
44  
45  
46  
47

48 The following independent variables were not associated with any of the injury severity metrics in  
49 unadjusted analyses and were not included in multiple regression: whether the participant had taken  
50 a cycling training course or had a driver's license; weather; use of a helmet, visible clothing on the  
51 trunk, or bike lights; alcohol or drug use in the 6 hours prior to the trip; presence of bike signage,  
52 junctions, or construction; and distance visible along the route.  
53  
54  
55  
56  
57  
58  
59  
60

**Table 3.** Odds ratios (OR) and 95% confidence intervals (CI) for associations between metrics of injury severity and personal, trip, crash circumstance, and route characteristics (N=683). Multiple logistic regression models; all independent variables significant in at least one unadjusted analysis included.

|                                                         | Did not continue<br>by bike<br>N=528 (77%)<br>OR (95% CI) | Transported to<br>hospital by<br>ambulance<br>N=251 (37%)<br>OR (95% CI) | Admitted to<br>hospital<br>N=60 (8.8%)<br>OR (95% CI) | CTAS †<br>1 or 2, N=75 (11%)<br>3, N=284 (42%)<br>4 or 5, N=320 (47%)<br>OR (95% CI) |
|---------------------------------------------------------|-----------------------------------------------------------|--------------------------------------------------------------------------|-------------------------------------------------------|--------------------------------------------------------------------------------------|
| <b>Sex</b>                                              |                                                           |                                                                          |                                                       |                                                                                      |
| Male                                                    | 1 (reference)                                             | 1 (reference)                                                            | 1 (reference)                                         | 1 (reference)                                                                        |
| Female                                                  | <b>1.91 (1.26 – 2.92)</b>                                 | 1.34 (0.93 – 1.93)                                                       | 1.07 (0.59 – 1.94)                                    | 0.98 (0.71 – 1.35)                                                                   |
| <b>Age</b>                                              |                                                           |                                                                          |                                                       |                                                                                      |
| 19 to 29                                                | 1 (reference)                                             | 1 (reference)                                                            | 1 (reference)                                         | 1 (reference)                                                                        |
| 30 to 39                                                | 1.15 (0.70 – 1.88)                                        | 1.18 (0.75 – 1.85)                                                       | 1.18 (0.54 – 2.61)                                    | 1.29 (0.87 – 1.91)                                                                   |
| 40 to 49                                                | 1.22 (0.70 – 2.14)                                        | 1.40 (0.83 – 2.34)                                                       | 1.96 (0.89 – 4.33)                                    | <b>2.07 (1.33 – 3.23)</b>                                                            |
| 50 to 59                                                | 1.50 (0.77 – 2.95)                                        | 1.04 (0.57 – 1.91)                                                       | 1.02 (0.35 – 2.97)                                    | 1.57 (0.95 – 2.62)                                                                   |
| ≥ 60                                                    | 1.33 (0.63 – 2.82)                                        | <b>2.57 (1.31 – 5.05)</b>                                                | <b>3.52 (1.37 – 9.04)</b>                             | 1.42 (0.78 – 2.60)                                                                   |
| <b>Considered themselves<br/>an experienced cyclist</b> |                                                           |                                                                          |                                                       |                                                                                      |
| No                                                      | 1 (reference)                                             | 1 (reference)                                                            | 1 (reference)                                         | 1 (reference)                                                                        |
| Yes                                                     | 1.36 (0.63 – 2.95)                                        | 2.16 (0.97 – 4.83)                                                       | 1.03 (0.28 – 3.84)                                    | 1.52 (0.78 – 2.95)                                                                   |
| <b>Cycling frequency °</b>                              |                                                           |                                                                          |                                                       |                                                                                      |
|                                                         | 1.00 (0.78 – 1.76)                                        | 0.92 (0.72 – 1.08)                                                       | 1.18 (0.85 – 1.50)                                    | <b>1.18 (1.00 – 1.38)</b>                                                            |
| <b>Time of day</b>                                      |                                                           |                                                                          |                                                       |                                                                                      |
| Day                                                     | 1 (reference)                                             | 1 (reference)                                                            | 1 (reference)                                         | 1 (reference)                                                                        |
| Dusk or dawn                                            | 0.65 (0.33 – 1.29)                                        | 0.53 (0.24 – 1.13)                                                       | 0.75 (0.21 – 2.62)                                    | 0.72 (0.39 – 1.30)                                                                   |
| Night                                                   | 0.90 (0.53 – 1.54)                                        | 1.16 (0.71 – 1.90)                                                       | 1.87 (0.90 – 3.86)                                    | 0.90 (0.58 – 1.40)                                                                   |
| <b>Motor vehicle collision</b>                          |                                                           |                                                                          |                                                       |                                                                                      |
| No                                                      | 1 (reference)                                             | 1 (reference)                                                            | 1 (reference)                                         | 1 (reference)                                                                        |
| Yes                                                     | <b>3.46 (2.07 – 5.76)</b>                                 | <b>3.66 (2.44 – 5.48)</b>                                                | 1.27 (0.63 – 2.54)                                    | <b>2.03 (1.41 – 2.90)</b>                                                            |
| <b>Route type</b>                                       |                                                           |                                                                          |                                                       |                                                                                      |
| Major street                                            | 1 (reference)                                             | 1 (reference)                                                            | 1 (reference)                                         | 1 (reference)                                                                        |
| Local street                                            | 1.08 (0.61 – 1.92)                                        | 1.44 (0.86 – 2.39)                                                       | <b>2.76 (1.15 – 6.62)</b>                             | 1.18 (0.75 – 1.84)                                                                   |
| Sidewalk                                                | 1.15 (0.42 – 3.19)                                        | <b>3.72 (1.37 – 10.1)</b>                                                | 3.26 (0.51 – 20.7)                                    | 1.31 (0.56 – 3.06)                                                                   |
| Multi-use path                                          | 1.33 (0.52 – 3.44)                                        | 2.18 (0.83 – 5.77)                                                       | <b>7.56 (1.43 – 40.0)</b>                             | 1.22 (0.55 – 2.68)                                                                   |
| Bicycle-specific<br>infrastructure                      | 0.98 (0.50 – 1.94)                                        | 1.02 (0.55 – 1.89)                                                       | 0.89 (0.27 – 2.99)                                    | 1.27 (0.74 – 2.18)                                                                   |
| <b>Intersection</b>                                     |                                                           |                                                                          |                                                       |                                                                                      |
| No                                                      | 1 (reference)                                             | 1 (reference)                                                            | 1 (reference)                                         | 1 (reference)                                                                        |
| Yes                                                     | <b>0.57 (0.36 – 0.88)</b>                                 | 1.44 (0.98 – 2.13)                                                       | 1.04 (0.53 – 2.04)                                    | 0.89 (0.63 – 1.26)                                                                   |
| <b>Streetcar or train tracks</b>                        |                                                           |                                                                          |                                                       |                                                                                      |
| No                                                      | 1 (reference)                                             | 1 (reference)                                                            | 1 (reference)                                         | 1 (reference)                                                                        |
| Yes                                                     | 1.11 (0.65 – 1.91)                                        | 1.03 (0.63 – 1.70)                                                       | 0.98 (0.39 – 2.47)                                    | 1.36 (0.88 – 2.10)                                                                   |
| <b>Grade</b>                                            |                                                           |                                                                          |                                                       |                                                                                      |

|                                               |                    |                           |                    |                    |
|-----------------------------------------------|--------------------|---------------------------|--------------------|--------------------|
| Flat or uphill                                | 1 (reference)      | 1 (reference)             | 1 (reference)      | 1 (reference)      |
| Downhill                                      | 1.32 (0.89 – 1.96) | <b>1.62 (1.14 – 2.32)</b> | 1.23 (0.68 – 2.22) | 1.31 (0.96 – 1.79) |
| <b>Motor vehicle speed <math>\beta</math></b> | 1.05 (0.89 – 1.24) | <b>1.21 (1.01 – 1.43)</b> | 1.24 (0.91 – 1.69) | 1.08 (0.94 – 1.24) |

† CTAS = Canadian Triage and Acuity Scale, grouped into 3 categories for analysis using ordinal logistic regression; the odds ratio represents the comparison of categories 1 & 2 vs. 3, 4 & 5 and categories 1, 2 & 3 vs. 4 & 5 under the proportional odds assumption. The proportional odds assumption was met, meaning that the odds ratios for these two comparisons are equivalent.

° Mean cycling frequency = 152 trips/y, SD = 81 trips/y; Odds ratios and confidence intervals calculated for a one standard deviation increase

$\beta$  Mean motor vehicle speed = 36 km/h, SD = 9.5 km/h; odds ratios and confidence intervals calculated for a one standard deviation increase. This is a mean of means: 683 sites, each with 5 speed measurements taken during the site observation period (~30 minutes), then averaged. Speeds were measured using a Bushnell Velocity Speed Gun (Overland Park, KS).

## DISCUSSION

In this study, using four severity metrics that spanned rider self-evaluation (unable to continue by bike) to clinical-practitioner evaluation (CTAS), we found that the following characteristics were associated with more severe injuries: older age; female sex; more experience and frequency of cycling; collision with a motor vehicle; crash on a multi-use path, sidewalk or local street, at non-intersection location, on a downhill grade, and at locations with higher motor vehicle speeds.

### Personal Characteristics

Older age has frequently been associated with more severe injuries in bicycling crashes.[19-22, 29-33]

We observed the same for all metrics, though the odds ratio was not always statistically significant.

This pattern is attributed to increasing frailty with age and has been observed for all vulnerable road users.[32]

Although sex has frequently been associated with bicycling injury severity, the evidence does not show a clear pattern. We found that women were less likely to continue their trip by bicycle and had a non-significant increased chance of ambulance transport. Moore *et al.* found women to have more severe injuries,[31] but others have found higher severities in men.[19,22,32] Theories for each of these results are available. The smaller average size of women may make them more vulnerable and

1  
2  
3 men may be more comfortable handling minor injuries without help. A greater propensity for risk-  
4 taking and speed may provide opportunities for men to have higher impact crashes.[34-36]  
5  
6

7  
8 We found that experienced cyclists and those who cycled more frequently had greater injury severity  
9 (more likely to need ambulance transport, or to have a more urgent triage score, respectively).  
10

11 Similarly Heesh *et al.* found that frequent and experienced cyclists had more severe injuries.[21]  
12

13 These cyclists may travel at higher speeds and incur higher impact forces in a crash.  
14  
15

### 16 17 18 **Crash Circumstances** 19

20  
21 About a third of the injuries were collisions with motor vehicles. These were strongly associated  
22 with three of our four injury severity metrics. In other research, collisions with motor vehicles have  
23 consistently been associated with increased severity.[11,19-22] Collisions with larger vehicles have  
24 resulted in more severe injuries and fatalities.[29,31,33,37]  
25  
26  
27

28  
29 Previous analyses of our study data showed that collisions with motor vehicles were associated with  
30 route type.[38] They never occurred on off-street bike paths or on cycle tracks (separated bike lanes),  
31 and were over-represented on major streets with parked cars and no bike infrastructure. Therefore,  
32 for the severity analyses presented here, we considered whether route type confounded the  
33 association between collision with a motor vehicle and severity (and vice versa), but this was not the  
34 case, nor was there interaction between the two variables (data not shown).  
35  
36  
37

38  
39 The severity of direct collisions with motor vehicles provides clear rationale for transportation  
40 planners to minimize interactions between cyclists and vehicles. This planning approach is  
41 supported by the results of our earlier analyses of injury risk: cycle tracks (bike lanes that physically  
42 separate cyclists and motor vehicle traffic) were associated with 1/9<sup>th</sup> the risk compared to streets  
43 with no bicycle infrastructure.[17] Separating modes of traffic with large differences in speed and  
44 mass is a principle used by countries such as Sweden, Germany, Denmark and the Netherlands  
45  
46  
47  
48  
49  
50  
51  
52  
53  
54  
55  
56  
57  
58  
59  
60

1  
2  
3 where bicycling injury risk is much lower than in North America.[6,8] A rationale for this approach  
4  
5 is that human error is inevitable, so it is important to minimize the consequences of such errors.  
6  
7 Bicycling facilities separated from motor vehicles minimize the likelihood of a collision and the  
8  
9 potential for severe injury when either a driver or a cyclist makes an error.  
10  
11

### 12 13 **Route Characteristics**

14  
15 Our main interest in this analysis was to determine whether route characteristics were associated  
16  
17 with increased or reduced injury severity. Route type, presence of an intersection, grade, and average  
18  
19 motor vehicle speed at the crash location were all associated with injury severity.  
20  
21

22  
23 In comparison to crashes on major streets without cycling infrastructure, crashes on sidewalks and  
24  
25 multi-use paths had considerably higher odds of ambulance transport (odds ratio for multi-use paths  
26  
27 not significant). Crashes on sidewalks and multi-use paths also had considerably higher odds of  
28  
29 hospital admission (odds ratio for sidewalks not significant). In our earlier analyses of injury risk,  
30  
31 multi-use paths and sidewalks had among the highest risks, despite being off-street.[17,18] The  
32  
33 increased severity after a crash adds to concern about these route types. Local streets (mainly  
34  
35 residential streets) were found to be a safe route type in our earlier analyses, with only about half the  
36  
37 injury risk.[17] The current analysis indicates that if a crash did occur, there was an increased odds of  
38  
39 one severity measure – hospitalization.  
40  
41  
42  
43

44  
45 Few studies have examined route type and injury severity. De Rome *et al.* found that more severe  
46  
47 injuries were associated with crashes in traffic and on multi-use paths, and less severe with crashes in  
48  
49 bike lanes and on sidewalks.[25] Slaughter *et al.* found lower severity in bike lane crashes.[39] In  
50  
51 earlier analyses of our study, bicycle-specific infrastructure was found to have lower injury crash risk  
52  
53 than major streets without such infrastructure,[17] but the current analysis indicates that if a crash  
54  
55 did occur, injury severity was similar. This may in part be because most of the injury sites with  
56  
57  
58  
59  
60

1  
2  
3 bicycle-specific infrastructure in our study were bike lanes without physical separation from motor  
4  
5 vehicles.  
6

7  
8 Intersection vs. non-intersection crash locations did not present a clear pattern of association with  
9  
10 severity in this study. Moore *et al.* found differing patterns of injury severity at intersections and non-  
11  
12 intersections.[31]  
13

14  
15 Downhill grade was significantly associated with increased severity for all metrics in unadjusted  
16  
17 analyses, and remained significant in the final model for ambulance transport. Three previous studies  
18  
19 have shown that injury severity is greater with grades.[23,24,31] Downhill grade is likely to be  
20  
21 associated with increased cyclist (and motor vehicle) speed, and therefore increased force of impact.  
22  
23 Our earlier analyses found that downhill slopes were associated with higher injury risk, and that  
24  
25 uphill grades deter cycling.[15,17,18] This suggests that, wherever possible, routing bicycle facilities  
26  
27 where slopes are gentle is a good strategy for both reducing injuries and motivating cycling.  
28  
29  
30

31  
32 Higher average motor vehicle speed was associated with increased severity for all metrics, and  
33  
34 remained significant in the final model for ambulance transport. Other studies found higher speed  
35  
36 roads to be associated with greater injury severity to cyclists.[23,24,37] Our earlier analyses found  
37  
38 that injury risk was higher at intersections where motor vehicle speeds were greater than 30 km/h  
39  
40 and that routes with high vehicle speeds deter cycling.[15,18] This supports recent changes in some  
41  
42 European and North American cities to lower urban speed limits.  
43  
44  
45

### 46 47 **Trip Characteristics**

48  
49 Only one trip characteristic was associated with injury severity. Time of day (night riding) was  
50  
51 associated with a higher odds of hospital admission in unadjusted analyses and was elevated but not  
52  
53 significant in multiple regression. Night-time riding has been associated with increased injury  
54  
55 severity in other studies, especially where roadways were not lit.[24,29,32,33]  
56  
57  
58  
59  
60



1  
2  
3 Although much of the bicycle safety literature focuses on helmets and head injury mitigation,  
4 [22,37,40,41,42] helmet use was not associated with any of the severity metrics in this study. Both  
5  
6 biomechanical studies[42] and epidemiological studies[22,37,40,41] have demonstrated that helmets  
7  
8 can prevent serious skull and brain injuries. This study was not limited to head injuries, likely  
9  
10 contributing to our result that helmet use was not associated with injury severity. In one of the  
11  
12 largest studies to examine helmets, their use was found to significantly reduce head injuries, but was  
13  
14 not associated with serious injury mitigation across all body regions.[22,41] In this context, it is  
15  
16 important to recognize that cyclists may sustain injuries, including serious trauma, to any body part,  
17  
18 including their thorax, abdomen, neck and extremities.[22] A helmet can do nothing to prevent non-  
19  
20 head injuries. Our earlier analyses of injury risk show the potential for all injuries to be significantly  
21  
22 decreased for cyclists separated from motor vehicle traffic in a cycle track or a local street with  
23  
24 traffic diversion[17,18] and the present results show that injury severity significantly increases in a  
25  
26 collision with a motor vehicle. Together these results point to bicycle infrastructure that physically  
27  
28 separates cyclists from motor vehicle traffic to prevent trauma to any area of the body.  
29  
30  
31  
32  
33  
34

### 35 36 **Strengths and limitations**

37  
38 Strengths of the study include two study cities with differing climates, terrain, cycling mode shares  
39  
40 and cycling infrastructure, an urban-only cycling sample, the prospective accrual of subjects,  
41  
42 observation of route characteristics blinded to whether the site was an injury site, and the number of  
43  
44 clinical and cyclist self-report severity metrics.  
45  
46

47  
48 Study limitations include a relatively small sample of injured cyclists, restriction to Canadian cities  
49  
50 and lack of data on the anatomical location of the injury. As in all injury studies, only a portion of  
51  
52 injured cyclists were included; here, those whose injuries were serious enough to be treated at a  
53  
54 hospital emergency department, but not to cause death or a head injury so severe that the trip could  
55  
56  
57  
58  
59  
60

1  
2  
3 not be recalled. This reduced the pool of the most severely injured cases: 2 potential participants  
4 were fatally injured, 26 of those contacted could not remember their route, and 7 could not recall  
5 their crash circumstances. An unknown number of cyclists had injuries so minor that no emergency  
6 department visit was made.  
7  
8  
9

10  
11  
12 Our overall study had a case-crossover design that compared injury sites to control sites within a  
13 person-trip, fully controlling for differences between individuals and trips that might confound the  
14 relationship between injury risk and infrastructure (the primary focus of the study). To examine  
15 severity of injuries in the current analysis, the analysis was restricted to cases only, comparing  
16 participants with more severe injuries to those with less severe injuries, introducing the potential for  
17 confounding by personal and trip characteristics. We addressed this via adjustment in our regression  
18 models, but the potential for uncontrolled confounding by unmeasured characteristics remains.  
19  
20  
21  
22  
23  
24  
25  
26  
27  
28

29  
30 Given that we did not have data on more traditional measures of severity, the Abbreviated Injury  
31 Scale and Injury Severity Score, it is important to consider our outcome metrics, their relationship to  
32 each other and their potential reliability and validity as measures of severity. The four metrics  
33 measured different aspects of severity, as described above (Figure 1, Table 2).  
34  
35  
36  
37  
38

39  
40 Hospital admission is based on an in depth medical assessment and should reflect the most severe  
41 injuries. There are no standardized decision criteria, and physicians' decisions to admit emergency  
42 department patients to hospital have been found to differ substantially.[43] Data from Rivara *et al.*  
43 were available to compare hospitalization to Injury Severity Scores above *vs.* below 9.[22] They  
44 found that those with higher scores were 43 times more likely to be admitted to hospital.  
45  
46  
47  
48

49  
50 Hospitalization had high specificity (0.94) but lower sensitivity (0.72), suggesting that few patients  
51 with minor injuries are admitted to hospital, but some who are severely injured are not admitted.  
52  
53  
54

55  
56 This could be because some patients with severe injuries (e.g., some extremity fractures, intra-  
57  
58  
59  
60

1  
2  
3 abdominal trauma) may be treated and stabilized in an emergency department then discharged home,  
4  
5 but scheduled for later surgical repair. This may have contributed to our somewhat different results  
6  
7 for hospital admission and its lower correlations with the other metrics.  
8  
9

10 Ambulance transport is based, in part, on whether or not someone at the scene called an ambulance.  
11  
12 It had the strongest correlations with all other outcome metrics. Data from Lang *et al.* were available  
13  
14 to compare ambulance transport to Injury Severity Scores above *vs.* below 12.[44] Ambulance  
15  
16 transfer had low specificity (0.26) but high sensitivity (0.95), opposite to the pattern for  
17  
18 hospitalization. This suggests that most severely injured patients are transported by ambulance, but  
19  
20 so are many who are not severely injured.  
21  
22  
23

24  
25 The CTAS scale is based on assessment by a triage nurse of a standardized list of presenting  
26  
27 complaints, vital sign modifiers, and pain severity.[27] Certain injury mechanisms, e.g., being hit by a  
28  
29 motor vehicle, may be assigned a greater urgency score. CTAS has been frequently tested for  
30  
31 reliability, with kappas for agreement beyond chance spanning a broad range from 0.25 to 0.89.[28]  
32  
33 We found no comparison of CTAS to Injury Severity Scores. We found no validity or reliability data  
34  
35 for continuing to cycle.  
36  
37  
38  
39  
40  
41

## 42 CONCLUSIONS

43  
44  
45 In two of Canada's largest cities, approximately one-third of the bicycle crashes were collisions with  
46  
47 a motor vehicle and the resulting injuries were more severe than in other crash circumstances.

48  
49 Certain route types (in particular multi-use paths and sidewalks), downhill grades, and higher motor  
50  
51 vehicle speeds were also associated with increased injury severity. These results suggest an urgent  
52  
53 need to provide bike facilities that separate cyclists from motor vehicle traffic, that minimize slopes  
54  
55 and have lower motor vehicle speeds, and that are designed specifically for bicycling rather than for  
56  
57  
58  
59  
60

1  
2  
3 sharing with pedestrians. These bicycle infrastructure modifications would reduce both crashes and  
4  
5 injury severity after a crash.  
6  
7  
8  
9

10  
11 **ACKNOWLEDGEMENTS:** We would like to thank all the study participants for generously  
12 contributing their time. We appreciate the work of study staff, hospital personnel and our city and  
13 community collaborators. This study evolved from work conducted in the University of British  
14 Columbia's Bridge Program Grant Development course (2005-2006) and benefitted from input  
15 from the participants of that class.  
16  
17  
18  
19  
20  
21  
22  
23

24 **CONTRIBUTORS:** KT, MAH, CCOR, and PC were responsible for initial conception and design  
25 of the study. KT, MAH, CCOR, PC, MW, SB, MC, MDC, JB, SMF, Garth Hunte and Kishore  
26 Mulpuri were responsible for the funding proposal. CCOR, MAH, MW, MDC, KT, Melody Monroe  
27 and Lee Vernich designed and tested data collection instruments. MW, HS and KT developed  
28 algorithms for defining route infrastructure. HS was responsible for data analyses. All authors had  
29 full access to the results of all analyses. PC, HS and KT drafted the article. All authors contributed to  
30 study design and implementation, analysis decisions, interpretation of results, and critical revision of  
31 the article. Evan Beaupré, Niki Blakely, Jill Dalton, Martin Kang, Kevin McCurley, and Andrew  
32 Thomas were responsible for interviews or site observations. Vartouji Jazmaji, Melody Monroe and  
33 Lee Vernich were responsible for supervision and training of study staff, and recruitment of  
34 participants. Barb Boychuk, Jan Buchanan, Doug Chisholm, Nada Elfeki, Garth Hunte, JB, SMF,  
35 and MDC contributed to identification of injured cyclists at the study hospitals. Jack Becker, Bonnie  
36 Fenton, David Hay, Nancy Smith Lea, Peter Sary, Fred Sztabinski, David Tomlinson, and Barbara  
37 Wentworth reviewed the study protocol, data collection forms, and infrastructure definitions from  
38  
39  
40  
41  
42  
43  
44  
45  
46  
47  
48  
49  
50  
51  
52  
53  
54  
55  
56  
57  
58  
59  
60

1  
2  
3 the perspective of professionals or advocates involved in cycling transportation. Data were double  
4 entered by Express Data Ltd.  
5  
6  
7

8  
9 **FUNDING:** This work was supported by a grant from the Heart and Stroke Foundation of Canada  
10 and the Canadian Institutes of Health Research (Institute of Musculoskeletal Health and Arthritis  
11 and Institute of Nutrition, Metabolism and Diabetes) (Grant number: BEO-85863). J. R. Brubacher,  
12 M.A. Harris, and M. Winters were supported by salary awards from the Michael Smith Foundation  
13 for Health Research. M. A. Harris, C. C. O. Reynolds, and M. Winters were supported by salary  
14 awards from the Canadian Institutes of Health Research.  
15  
16  
17  
18  
19  
20  
21

22  
23 **COMPETING INTERESTS:** None.  
24  
25

26 **PATIENT CONSENT:** Obtained  
27  
28

29  
30 **ETHICS APPROVAL:** The study methods were reviewed and approved by the human subjects  
31 ethics review boards of the University of British Columbia (BREB REB H06-03833), the University  
32 of Toronto (#22628), St. Paul's Hospital (BREB REB H06-03833), Vancouver General Hospital  
33 (#V07-0275), St. Michael's Hospital (REB 08-046C), and the University Health Network (Toronto  
34 General Hospital and Toronto Western Hospital; REB 07-0839-AE). All participants gave informed  
35 consent before taking part in the study.  
36  
37  
38  
39  
40  
41  
42

43 **DATA SHARING STATEMENT:** The study database was compiled from interviews with study  
44 participants and site observations by study personnel. It cannot be shared by the authors with  
45 anyone without approval from the University and Hospital human subjects review boards.  
46  
47  
48  
49  
50  
51  
52  
53  
54  
55  
56  
57  
58  
59  
60

## Figure Legend

**Figure 1.** Metrics of severity of cycling injuries to 683 study participants, stratified by CTAS.  
CTAS = Canadian Triage and Acuity Scale, where 5 is the least medically urgent and 1 is the most.

**Figure 2.** Crash circumstances vs. metrics of severity.  
Collisions could be with a motor vehicle, obstacle, surface feature, cyclist, pedestrian, or animal. Motor vehicle “involved” includes both direct collisions with vehicles and crashes resulting from manoeuvres to avoid a motor vehicle.

For peer review only

## REFERENCES

1. Hamer M, Chida Y. Active commuting and cardiovascular risk: a meta-analytic review. *Prev Med* 2008;46(1):9–13
2. Wen LM, Rissel C. Inverse associations between cycling to work, public transport, and overweight and obesity: findings from a population based study in Australia. *Prev Med* 2008;46(1):29–32
3. Beck LF, Dellinger AM, O'Neil ME. Motor vehicle crash injury rates by mode of travel, United States: using exposure-based methods to quantify differences. *Am J Epidemiol* 2007;166(2):212–218
4. Teschke K, Harris MA, Reynolds CCO, *et al.* Exposure-based traffic crash injury rates by mode of travel in British Columbia. *Can J Public Health* 2013;104(1):e75–79
5. Parkin J. Comparisons of cycle use for the journey to work from the '81, '91 and 2001 censuses. *Traffic Eng Control* 2003;44(8):299-302
6. Pucher J, Buehler R. Making cycling irresistible: lessons from the Netherlands, Denmark and Germany. *Transp Rev* 2008;28(4):495–528
7. Pucher J, Buehler R, Seinen M. Bicycling renaissance in North America? An update and re-appraisal of cycling trends and policies. *Transp Res Part A Policy Pract* 2011;45(6):451-475
8. Jacobsen PL. Safety in numbers: more walkers and bicyclists, safer walking and bicycling. *Inj Prev* 2003;9(3):205–209.
9. NHTSA *Traffic Safety Facts 2010 Data. Bicyclists and other cyclists.* 2010
10. Transport Canada. *Canadian Motor Vehicle Traffic Collision Statistics: 2010.* 2013
11. Hamann C, Peek-Asa C. On-road bicycle facilities and bicycle crashes in Iowa, 2007–2010. *Accid Anal Prev* 2013;56:103–109

- 1  
2  
3 12. Canadian Institute for Health Information. *Cycling Injury Hospitalizations in Canada, 2009-2010*.  
4  
5 2012  
6
- 7  
8 13. Noland RB. Perceived risk and modal choice: risk compensation in transportation systems.  
9  
10 *Accid Anal Prev* 1995;27(4):503–521  
11
- 12 14. Ogilvie D, Egan M, Hamilton V, *et al*. Promoting walking and cycling as an alternative to  
13 using cars: systematic review. *BMJ* 2004;329(7469):763  
14
- 15 15. Winters M, Brauer M, Setton EM, *et al*. Built environment influences on healthy  
16 transportation choices: bicycling versus driving. *J Urban Health* 2010;87(6):969–993  
17
- 18 16. Reynolds CC., Anne Harris M, Teschke K, *et al*. The impact of transportation infrastructure  
19 on bicycling injuries and crashes: a review of the literature. *Environ Health* 2009;8(1):1–19  
20
- 21 17. Teschke K, Harris MA, Reynolds CCO, *et al*. Route infrastructure and the risk of injuries to  
22 bicyclists: A case-crossover study. *Am J Public Health* 2012;102(12):2336–2343  
23
- 24 18. Harris MA, Reynolds CCO, Winters M, *et al*. Comparing the effects of infrastructure on  
25 bicycling injury at intersections and non-intersections using a case-crossover design. *Inj Prev*  
26 2013;19:303-310  
27
- 28 19. Boström L, Nilsson B. A review of serious injuries and deaths from bicycle accidents in  
29 Sweden from 1987 to 1994. *J Trauma* 2001;50(5):900–907  
30
- 31 20. Chong S, Poulos R, Olivier J, *et al*. Relative injury severity among vulnerable non-motorised  
32 road users: comparative analysis of injury arising from bicycle-motor vehicle and bicycle-  
33 pedestrian collisions. *Accid Anal Prev* 2010;42(1):290–296  
34
- 35 21. Heesch KC, Garrard J, Sahlqvist S. Incidence, severity and correlates of bicycling injuries in  
36 a sample of cyclists in Queensland, Australia. *Accid Anal Prev* 2011;43(6):2085–2092  
37
- 38 22. Rivara FP, Thompson DC, Thompson RS. Epidemiology of bicycle injuries and risk factors  
39 for serious injury. *Inj Prev* 1997;3(2):110–114  
40  
41  
42  
43  
44  
45  
46  
47  
48  
49  
50  
51  
52  
53  
54  
55  
56  
57  
58  
59  
60



- 1  
2  
3 23. Allen-Munley C, Daniel J, Dhar S. Logistic model for rating urban bicycle route safety.  
4  
5 *Transp Res Rec* 2004;1878(-1):107–115  
6  
7
- 8 24. Klop J, Khattak A. Factors influencing bicycle crash severity on two-lane, undivided  
9  
10 roadways in North Carolina. *Transp Res Rec* 1999;1674(-1):78–85  
11
- 12 25. De Rome L, Boufous S, Georgeson T, *et al.* Bicycle crashes in different riding environments  
13  
14 in the Australian capital territory. *Traffic Inj Prev* 2014;15(1):81–88  
15
- 16 26. Harris MA, Reynolds CCO, Winters M, *et al.* The Bicyclists' Injuries and the Cycling  
17  
18 Environment study: a protocol to tackle methodological issues facing studies of bicycling  
19  
20 safety. *Inj Prev* 2011.  
21  
22
- 23 27. Bullard MJ, Under B, Spence J, *et al.* Revisions to the Canadian Emergency department  
24  
25 Triage and Acuity Scale (CTAS) adult guidelines. *CJEM* 2008;10:136-142  
26  
27
- 28 28. Christ M, Grossman F, Winter D, *et al.* Modern triage in the emergency department. *Dtsch*  
29  
30 *Arztebl Int* 2010;107:892-898  
31  
32
- 33 29. Kim J-K, Kim S, Ulfarsson GF, *et al.* Bicyclist injury severities in bicycle-motor vehicle  
34  
35 accidents. *Accid Anal Prev* 2007;39(2):238–251  
36  
37
- 38 30. Lustenberger T, Inaba K, Talving P, *et al.* Bicyclists injured by automobiles: relationship of  
39  
40 age to injury type and severity--a national trauma databank analysis. *J Trauma*  
41  
42 2010;69(5):1120–1125  
43  
44
- 45 31. Moore DN, Schneider WH, Savolainen PT, *et al.* Mixed logit analysis of bicyclist injury  
46  
47 severity resulting from motor vehicle crashes at intersection and non-intersection locations.  
48  
49 *Accid Anal Prev* 2011;43(3):621–630  
50  
51
- 52 32. Rifaat SM, Tay R, de Barros A. Effect of street pattern on the severity of crashes involving  
53  
54 vulnerable road users. *Accid Anal Prev* 2011;43(1):276–283  
55  
56  
57  
58  
59  
60

- 1  
2  
3  
4 33. Yan X, Ma M, Huang H, *et al.* Motor vehicle–bicycle crashes in Beijing: Irregular maneuvers,  
5 crash patterns, and injury severity. *Accid Anal Prev* 2011;43(5):1751–1758  
6  
7  
8 34. Begg DJ, Langley JD, Stephenson S. Identifying factors that predict persistent driving after  
9 drinking, unsafe driving after drinking, and driving after using cannabis among young adults.  
10  
11 *Accid Anal Prev* 2003;35(5):669–675  
12  
13  
14 35. Nieves JW, Formica C, Ruffing J, *et al.* Males have larger skeletal size and bone mass than  
15 females, despite comparable body size. *J Bone Miner Res* 2005;20(3):529–535  
16  
17  
18 36. Wu C, Yao L, Zhang K. The red-light running behavior of electric bike riders and cyclists at  
19 urban intersections in China: an observational study. *Accid Anal Prev* 2012;49:186–192  
20  
21  
22 37. Bambach MR, Mitchell RJ, Grzebieta RH, *et al.* The effectiveness of helmets in bicycle  
23 collisions with motor vehicles: A case-control study. *Accid Anal Prev* 2013;53:78–88  
24  
25  
26 38. Teschke K, Frendo T, Shen H, *et al.* Do bicycling crash circumstances vary by route type? A  
27 cross-sectional study. *BMC Public Health* 2014;14:1205  
28  
29  
30 39. Slaughter DR, Williams N, Wall SP, *et al.* A community traffic safety analysis of pedestrian  
31 and bicyclist injuries based on the catchment area of a trauma center. *J Trauma Acute Care*  
32 *Surg* 2014;76(4):1103–1110  
33  
34  
35 40. Elvik R. Publication bias and time-trend bias in meta-analysis of bicycle helmet efficacy: A  
36 re-analysis of Attewell, Glase and McFadden, 2001. *Accid Anal Prev* 2011;43(3):1245–1251  
37  
38  
39 41. Thompson DC, Rivara FP, Thompson RS. Effectiveness of bicycle safety helmets in  
40 preventing head injuries. A case-control study. *JAMA* 1996;276(24):1968–1973  
41  
42  
43 42. Cripton PA, Dressler DM, Stuart CA, *et al.* Bicycle helmets are highly effective at preventing  
44 head injury during head impact: Head-form accelerations and injury criteria for helmeted and  
45  
46  
47  
48  
49  
50  
51  
52  
53  
54  
55  
56  
57  
58  
59  
60

- 1  
2  
3  
4  
5  
6  
7  
8  
9  
10  
11  
12  
13  
14  
15  
16  
17  
18  
19  
20  
21  
22  
23  
24  
25  
26  
27  
28  
29  
30  
31  
32  
33  
34  
35  
36  
37  
38  
39  
40  
41  
42  
43  
44  
45  
46  
47  
48  
49  
50  
51  
52  
53  
54  
55  
56  
57  
58  
59  
60
43. Mutrie D, Bailey SK, Malik S. Individual emergency physician admission rates: predictably unpredictable. *CJEM* 2009;11:149-155
44. Lang J, Dallow N, Lang A, *et al.* Inclusion of minor trauma cases provides a better estimate of the total burden of injury: Queensland Trauma Registry provides a unique perspective. *Injury* 2014;45:1236-1241

1  
2  
3  
4 **Severity of urban cycling injuries and the relationship with personal, trip, route and crash**  
5 **characteristics: Analyses using four severity metrics**  
6  
7  
8  
9

10  
11  
12 Peter A. Cripton<sup>1</sup>, Hui Shen<sup>2</sup>, Jeff R. Brubacher<sup>3</sup>, Mary Chipman<sup>4</sup>, Steven M. Friedman<sup>5,6</sup>, M. Anne  
13  
14 Harris<sup>7</sup>, Meghan Winters<sup>8</sup>, Conor C.O. Reynolds<sup>9</sup>, Michael D. Cusimano<sup>10,11</sup>, Shelina Babul<sup>12</sup>, Kay  
15  
16 Teschke<sup>2,\*</sup>  
17

18  
19  
20 \* Corresponding author

21  
22 School of Population and Public Health, University of British Columbia, 2206 East Mall,  
23  
24 Vancouver, BC, Canada, V6T 1Z3

25  
26  
27 [kay.teschke@ubc.ca](mailto:kay.teschke@ubc.ca)

28  
29  
30 604 822-2041  
31  
32

33  
34 <sup>1</sup>Department of Mechanical Engineering, University of British Columbia, Vancouver, Canada  
35

36  
37 <sup>2</sup>School of Population and Public Health, University of British Columbia, Vancouver, Canada  
38

39  
40 <sup>3</sup>Department of Emergency Medicine, University of British Columbia, Vancouver, Canada  
41

42  
43 <sup>4</sup>Dalla Lana School of Public Health, University of Toronto, Toronto, Canada  
44

45  
46 <sup>5</sup>Faculty of Medicine, University of Toronto, Toronto, Canada  
47

48  
49  
50 <sup>6</sup>University Health Network, Toronto, Canada  
51

52  
53 <sup>7</sup>School of Occupational and Public Health, Ryerson University, Toronto, Canada  
54

55  
56 <sup>8</sup>Faculty of Health Sciences, Simon Fraser University, Burnaby, Canada  
57  
58  
59  
60

1  
2  
3  
4  
5  
6  
7  
8  
9  
10  
11  
12  
13  
14  
15  
16  
17  
18  
19  
20  
21  
22  
23  
24  
25  
26  
27  
28  
29  
30  
31  
32  
33  
34  
35  
36  
37  
38  
39  
40  
41  
42  
43  
44  
45  
46  
47  
48  
49  
50  
51  
52  
53  
54  
55  
56  
57  
58  
59  
60

<sup>9</sup>Institute for Resources, Environment and Sustainability, University of British Columbia,  
Vancouver, Canada

<sup>10</sup>Division of Neurosurgery and Injury Prevention Research Office, Keenan Research Centre, St.  
Michael's Hospital, Toronto, Canada

<sup>11</sup>Departments of Surgery and Education and Public Health, University of Toronto, Toronto,  
Canada

<sup>12</sup>Department of Pediatrics, University of British Columbia, Vancouver, Canada

Abstract word count: 291

Article word count: 4040 (excluding acknowledgements)

Key words: Bicycle; injury severity; bike lanes; epidemiology

## ABSTRACT

**Objective:** To examine the relationship between cycling injury severity and personal, trip, route and crash characteristics.

**Methods:** Data from a previous study of injury risk, conducted in Toronto and Vancouver, Canada, were used to classify injury severity using four metrics: 1) did not continue trip by bike; 2) transported to hospital by ambulance; 3) admitted to hospital; and 4) Canadian Triage and Acuity Scale (CTAS). Multiple logistic regression was used to examine associations with personal, trip, route and crash characteristics.

**Results:** Of 683 adults injured while cycling, 528 did not continue their trip by bike, 251 were transported by ambulance, and 60 were admitted to hospital for further treatment. Treatment urgencies included 75 as CTAS=1 or 2 (most medically urgent), 284 as CTAS=3, and 320 as CTAS=4 or 5 (least medically urgent). Older age and collision with a motor vehicle were consistently associated with increased severity in all four metrics and statistically significant in three each (both variables with ambulance transport and CTAS; age with hospital admission; and motor vehicle collision with did not continue by bike). Other factors were consistently associated with more severe injuries, but statistically significant in one metric each: downhill grades; higher motor vehicle speeds; multi-use paths (these significant for ambulance transport); sidewalks; and local streets (both significant for hospital admission).

**Conclusions:** In two of Canada's largest cities, about one-third of the bicycle crashes were collisions with motor vehicles and the resulting injuries were more severe than in other crash circumstances, underscoring the importance of separating cyclists from motor vehicle traffic. Our results also suggest that both bicycling injury severity and injury risk would be reduced on facilities that

1  
2  
3 minimize slopes, have lower vehicle speeds, and that are designed for bicycling rather than shared  
4  
5 with pedestrians.  
6  
7

### 8 9 **Strengths and Limitations of this Study**

- 10  
11  
12
- 13 • This study is one of few to examine the relationship between route characteristics and  
14 severity of bicycling injuries. Its major strength was use of data from a study of bicycling  
15 injury risk. This made it possible to consider whether route characteristics that increased  
16 injury risk were similar to or different from those that increased bicycling injury severity.  
17  
18
  - 19 • The results show that facilities that separate cyclists from motor vehicle traffic and  
20 pedestrians, minimize slopes, and lower motor vehicle speeds would reduce both injury  
21 severity after a crash and reduce injury risk.  
22  
23
  - 24 • The analyses examined four metrics covering different aspects of injury severity (not able to  
25 continue the trip by bike, transport to hospital by ambulance, admission to hospital, and  
26 treatment urgency) and identified factors that were consistently associated with increased  
27 severity: increased age and collision with a motor vehicle.  
28  
29
  - 30 • The study included a range of injury severities resulting in emergency treatment at a hospital  
31 but did not include those so severely injured they could not remember their trip, nor those  
32 with such minor injuries that emergency treatment was not required.  
33  
34
  - 35 • The influence of route characteristics on severity was adjusted for potential confounding by  
36 personal and trip characteristics in the regression models, but the potential for uncontrolled  
37 confounding by unmeasured characteristics remains.  
38  
39  
40  
41  
42  
43  
44  
45  
46  
47  
48  
49  
50  
51  
52  
53  
54  
55  
56  
57  
58  
59  
60

## INTRODUCTION

Cycling is used for transportation and is a popular recreational activity. Its health benefits are clear, [1,2] in contrast to motor vehicle travel. Transportation cycling has risks in the same order of magnitude as driving and walking in the US and Canada.[3,4] However **injury and fatality risks are higher than** in some European countries where cycling participation is much higher.[5-8]

In 2010, there were 618 cyclist traffic deaths in the United States and 60 in Canada.[9,10] Broader data (including bicycling sports such as mountain biking) indicate that about 27,800 Americans and 4,300 Canadians were hospitalized for cycling injuries in 2009.[11,12] Although bicycling injuries are a small proportion of all traffic injuries and deaths in North America (~2 to 4%),[9,10] reducing their incidence is important because of the direct harm that they do and because they deter potential cyclists.[13-15]

The reason postulated for the inversion of cycling activity and injury risk between North America and Europe is the well-designed bicycle-specific infrastructure in Europe *vs.* its relative paucity in North America. We reviewed published studies and found that bicycle-specific infrastructure was associated with decreased injury risk, but a small range of infrastructure had been studied, often with uncertain control of exposure.[16] We subsequently conducted a case-crossover study of the association between route infrastructure and **injury** risk.[17,18] It found that infrastructure that was bicycle-specific (e.g., cycle tracks separated from traffic, bike lanes) or “bicycle-friendly” (e.g., local streets with traffic diversion) had considerably lower injury risk. Other features were found to increase **injury** risk: streetcar or train tracks, downhill grades, construction, major street intersections, and traffic circles at local street intersections. This work was designed to estimate associations with injury risk, with a no-injury control.



1  
2  
3 An alternative line of inquiry is what factors are associated with injury severity, among those who  
4 have been injured. Many studies have found that collisions with motor vehicles increase cyclist injury  
5 severity.[11,19-22] However few authors have examined severity with respect to route  
6 infrastructure.[23-25] Higher severity has been found with grades, higher speed roads, and crashes in  
7 traffic or on shared paths.[23-25] Although these results suggest that predictors of cycling injury risk  
8 may be similar to predictors of injury severity, this is not established, and our study offers the  
9 opportunity to examine both sets of outcomes, adding a level of context requested by policy makers,  
10 infrastructure designers and other stakeholders. In our opinion, injury severity, not just the fact of  
11 an injury, is a second and equally important criterion used by the lay public to evaluate the apparent  
12 safety of cycling.  
13  
14

15  
16  
17 Therefore we conducted additional analyses of data from our previous case-crossover study [17,18]  
18 to examine the relationship between injury severity and personal, trip, route and crash characteristics.  
19  
20  
21  
22  
23  
24  
25  
26

## 27 28 29 30 31 32 33 34 35 **METHODS**

36  
37  
38 Details about overall study conduct and reliability testing are described elsewhere [17,26]; methods  
39 related to the analyses presented here are described below. The study population consisted of adult  
40 ( $\geq 19$  years) residents of Toronto and Vancouver who were injured while riding a bicycle in the city  
41 and treated within 24 hours in the emergency departments of the following hospitals between May  
42 18, 2008 and November 30, 2009: St. Paul's or Vancouver General in Vancouver; St. Michael's,  
43 Toronto General or Toronto Western in Toronto. Injured cyclists were identified by research staff  
44 at each hospital who relayed contact information to the study co-ordinators. Introductory letters  
45 were sent to all potential participants, followed by a phone call from the study co-ordinator to invite  
46 participation and screen for eligibility. Those who were fatally injured or so severely injured that they  
47  
48  
49  
50  
51  
52  
53  
54  
55  
56  
57  
58  
59  
60

1  
2  
3 were unable to remember their trip were not included, nor were those injured during mountain  
4  
5 biking, trick riding, or racing.  
6  
7

8  
9 Data on characteristics related to severity were abstracted from emergency department records. In  
10  
11 addition, eligible participants were interviewed in person by trained interviewers about personal  
12  
13 characteristics, trip characteristics, and crash circumstances, using a structured questionnaire  
14  
15 (<http://cyclingincities.spph.ubc.ca/files/2011/10/InterviewFormFinal.pdf>).  
16  
17

18  
19 The study was not designed to focus on severity, so the data did not include classical severity scoring  
20  
21 using the Abbreviated Injury Scale. However we did have access to four indicators of severity:  
22  
23

- 24 1. Whether the subject continued their trip by bicycle (self-reported in the interview), no vs. yes
- 25 2. Whether the subject was transported by ambulance (hospital data), yes vs. no
- 26 3. Whether the subject was admitted to hospital (hospital data), yes vs. no
- 27 4. Canadian Triage and Acuity Scale (CTAS) (hospital data), levels 1 to 5, defined as  
28  
29 follows:[27,28]

- 30 • 1 – Resuscitation; need to be seen immediately
- 31 • 2 – Emergent; need to be seen within 15 minutes
- 32 • 3 – Urgent; need to be seen within 30 minutes
- 33 • 4 – Less urgent; need to be seen within 60 minutes
- 34 • 5 – Non urgent, need to be seen within 120 minutes

35  
36  
37  
38  
39  
40  
41  
42  
43  
44  
45  
46  
47 The relationship between these severity metrics was examined descriptively using cross-tabulations  
48  
49 and Pearson correlation coefficients.  
50  
51

52  
53 Site observations were made to document characteristics of injury and control sites, and allow route  
54  
55 infrastructure classification.[17,18] The observations were made blind to whether an injury took  
56  
57 place at the site or not. In the current analyses, only the injury site data was used.  
58  
59  
60

1  
2  
3 Unconditional logistic regression was used to examine associations of each of the following  
4  
5 independent variables with each severity outcome metric:  
6  
7

- 8 • personal characteristics: sex; age; how frequently he/she cycled; whether the cyclist  
9 considered himself/herself experienced, had taken a cycling training course, had a driver's  
10 license  
11  
12
- 13 • trip characteristics: time of day; weather; helmet use; use of visible clothing on the trunk;  
14  
15 whether bike lights were turned on; alcohol and drug use in the 6 hours prior  
16  
17
- 18 • route characteristics at the injury site: type of route; intersection location; presence of bike  
19  
20 signage; junctions; construction; streetcar tracks; grade; average vehicle speed; distance  
21  
22 visible along route.  
23  
24
- 25 • crash circumstances: collision (with a motor vehicle, obstacle, surface feature, cyclist,  
26  
27 pedestrian, or animal) vs. fall; collision with a motor vehicle vs. not; motor vehicle  
28  
29 "involvement" (i.e., both direct collisions with vehicles and crashes resulting from motor  
30  
31 vehicle avoidance manoeuvres) vs. not. No data on fault in the crash was collected.  
32  
33  
34  
35

36 All independent variables significant at  $p < 0.05$  in simple logistic regression (unadjusted analysis) of  
37  
38 any severity metric were included in multiple regression models for all four severity metrics. The  
39  
40 rationale for this broad inclusion of variables in the final models was to maximize control of  
41  
42 potential confounding by personal and trip characteristics, to allow comparison of results across  
43  
44 severity metrics, and to ensure that characteristics previously shown to be consistently related to  
45  
46 injury severity were included in all the models (i.e., age, crash circumstance).  
47  
48  
49

50 For dichotomous severity metrics (did not continue by bike vs. did, ambulance transport vs. not,  
51  
52 admitted to hospital vs. not), traditional logistic regression was used. For CTAS, ordinal logistic  
53  
54 regression modeled the odds of a more urgent CTAS group, after verifying that the proportional  
55  
56  
57  
58  
59  
60

1  
2  
3 odds assumption was valid. CTAS categories were grouped as follows: most urgent, levels 1 or 2;  
4  
5 moderate urgency, 3; least urgency, 4 or 5.  
6  
7

8 Additional analyses were conducted to evaluate the models. Analyses were run without the motor  
9 vehicle collision variable and, separately, without the route type variable to determine whether either  
10 vehicle collision variable and, separately, without the route type variable to determine whether either  
11 changed the relationship of the other to severity in the full models. Separate analyses were  
12 conducted for motor vehicle collisions and other collisions to determine whether there was  
13 interaction between the motor vehicle collision and route type variables.  
14  
15  
16  
17  
18  
19  
20  
21  
22

## 23 RESULTS

24  
25  
26 The study included 690 injured cyclists (414 in Vancouver, 276 in Toronto). Seven were unable to  
27 recall their crash circumstances, so were removed from analyses; none of these continued by bike,  
28 six were transported by ambulance, their CTAS scores were either 1 or 2, and one was admitted to  
29 hospital. After these subjects were excluded, 683 subjects remained for most analyses, though four  
30 additional subjects did not have information on CTAS or ambulance transport.  
31  
32  
33  
34  
35  
36  
37

38 Descriptive data about the study participants, the trips when their injuries occurred, the  
39 characteristics of the route at the injury site, and the crash circumstances are presented in Table 1.  
40 Most participants were men, young, and regular cyclists. Most wore a helmet, but few wore bright  
41 clothing or used bike lights. Most of the injury sites were on major or local streets with little or no  
42 cycling infrastructure and most were at non-intersection locations. A minority of injuries occurred at  
43 sites with bike-specific infrastructure.  
44  
45  
46  
47  
48  
49  
50  
51

52 Most of the crashes were collisions (74%, n=506) rather than falls. Direct collisions with motor  
53 vehicles (34%, n=231) were the most frequent collision type. Crashes “involving” motor vehicles  
54 (48%, n=330) included direct collisions, as well as crashes to avoid motor vehicle collisions (14%,  
55  
56  
57  
58  
59  
60

n=99). Few collisions involved other cyclists (3%, n=22), pedestrians (2%, n=12) or animals (1%, n=6).

**Table 1.** Personal characteristics of the cyclists, characteristics of the trip when the injury occurred, characteristics of the route at the site where the injury occurred, and crash circumstances (N=683)

|                                                                                                                                                 | N (%)     |
|-------------------------------------------------------------------------------------------------------------------------------------------------|-----------|
| Personal characteristics                                                                                                                        |           |
| Male                                                                                                                                            | 404 (59%) |
| Age                                                                                                                                             |           |
| 19 to 29                                                                                                                                        | 262 (39%) |
| 30 to 39                                                                                                                                        | 167 (25%) |
| 40 to 49                                                                                                                                        | 115 (17%) |
| 50 to 59                                                                                                                                        | 81 (12%)  |
| ≥ 60                                                                                                                                            | 55 (8.1%) |
| Regular cyclist (cycled ≥ 52 times per year)                                                                                                    | 602 (88%) |
| Had a driver's license                                                                                                                          | 613 (90%) |
| Considered themselves experienced                                                                                                               | 637 (93%) |
| Had taken a cycling training course                                                                                                             | 42 (6.1%) |
| Trip characteristics                                                                                                                            |           |
| Time of day                                                                                                                                     |           |
| Day                                                                                                                                             | 530 (78%) |
| Dawn or dusk                                                                                                                                    | 50 (7.3%) |
| Night                                                                                                                                           | 103 (15%) |
| Clear weather                                                                                                                                   | 473 (69%) |
| Helmet worn                                                                                                                                     | 472 (69%) |
| Bright clothing worn                                                                                                                            | 228 (33%) |
| Bike lights turned on                                                                                                                           | 133 (19%) |
| Alcohol consumed in previous 6 h                                                                                                                | 70 (10%)  |
| Drugs consumed in previous 6 h                                                                                                                  | 78 (11%)  |
| Route characteristics at the injury sites                                                                                                       |           |
| Route types                                                                                                                                     |           |
| Major streets (arterials and collectors, most with no bicycle infrastructure, a few with shared lanes, n=22)                                    | 289 (42%) |
| Local streets (mainly residential, many designated as bikeways, n=99)                                                                           | 187 (27%) |
| Sidewalks                                                                                                                                       | 52 (7.6%) |
| Multi-use paths (designated for pedestrian and bicyclists)                                                                                      | 73 (11%)  |
| Bicycle-specific infrastructure (bike lanes on major streets, n=59; cycle tracks alongside major streets, n=2; and off-street bike paths, n=21) | 82 (12%)  |
| At an intersection                                                                                                                              | 211 (31%) |
| Junctions in last 100 m                                                                                                                         | 593 (87%) |
| Bike signage present                                                                                                                            | 76 (11%)  |
| Construction present                                                                                                                            | 85 (12%)  |
| Streetcar or train tracks present                                                                                                               | 149 (22%) |
| Downhill grade                                                                                                                                  | 329 (48%) |
| Average vehicle speed > 30 km/h                                                                                                                 | 363 (53%) |
| Forward distance visible < 20 m                                                                                                                 | 12 (1.8%) |
| Crash circumstances                                                                                                                             |           |
| Collision with motor vehicle                                                                                                                    | 231 (34%) |
| Collision with streetcar or train tracks                                                                                                        | 97 (14%)  |
| Collision with other surface features (e.g., pothole, rock, roots, leaves, ice)                                                                 | 69 (10%)  |
| Collision with obstacle (e.g., post, curb, planter, lane divider)                                                                               | 69 (10%)  |
| Collision with cyclist, pedestrian, animal                                                                                                      | 40 (5.9%) |
| Falls                                                                                                                                           | 177 (26%) |

Figure 1 shows the distribution of subjects by the severity metrics, stratified by CTAS. The most urgent CTAS scores (1 or 2, n=75) were assigned to 11% of all subjects, 14% of those who did not continue by bike, 25% of those transported by ambulance and 28% of those who were admitted to hospital. Table 2 provides additional detail on the relationship between the metrics. Of the 251 subjects transported to hospital by ambulance, 99% did not continue by bike. Of the 60 subjects admitted to hospital, 100% did not continue by bike, and 75% were transported by ambulance. Pearson correlations show associations in the expected directions, but the correlations were not strong. Thus the four metrics had logical relationships to each other, but did not measure identical constructs.

**Table 2.** Relationship between the four metrics of severity: Pearson correlation coefficients above the diagonal; numbers of subjects below the diagonal.

|                                              | Did not continue by bike | Transported to hospital by ambulance | Admitted to hospital | CTAS* |
|----------------------------------------------|--------------------------|--------------------------------------|----------------------|-------|
| Did not continue by bike (n=528)             | –                        | 0.40                                 | 0.17                 | -0.29 |
| Transported to hospital by ambulance (n=251) | 249                      | –                                    | 0.24                 | -0.39 |
| Admitted to hospital (n=60)                  | 60                       | 45                                   | –                    | -0.20 |
| CTAS = 1 or 2 (n=75)                         | 74                       | 62                                   | 17                   | –     |

\* Correlations with CTAS were negative because the scale was in the opposite direction, with 1 = most urgent and 5 = least urgent. All other metrics were assigned 1 = more vs. 0 = less severe.

Figure 2 shows the severity metrics against crash circumstances, classified three ways. Collisions tended to be more severe than falls, and crashes “involving” motor vehicles tended to be more severe than those not. Direct collisions with motor vehicles had the highest proportion in the more severe category of every metric except admitted to hospital. In unadjusted analyses, collision (of any type) and motor vehicle “involvement” both had elevated odds ratios for the same severity metrics as motor vehicle collision (data not shown), but the odds ratios were lower, indicating that it was direct collision with a motor vehicle that led to increased severity. Only the motor vehicle collision variable was included in multiple regression models.

1  
2  
3 Table 3 shows the results of the multiple logistic regression models for each severity metric,  
4 including all independent variables statistically significant in at least one unadjusted analysis. Four  
5 personal characteristic variables were included: age, sex, cycling experience, and cycling frequency.  
6  
7 Age showed consistent associations across all severity metrics; older age groups had more severe  
8 injuries, significantly so for ambulance transport, admission to hospital and CTAS. Women were  
9 significantly more likely to stop their trip by bike than men. There was a tendency for more  
10 experienced and more regular cyclists to have higher injury severity, though only one association was  
11 statistically significant in multiple regression.  
12  
13  
14  
15  
16  
17  
18  
19  
20  
21

22 Cyclists whose crash was a direct collision with a motor vehicle had elevated odds ratios for all  
23 severity metrics, statistically significant for not continuing by bike, being transported by ambulance  
24 and more urgent triage score (CTAS). Those whose crashes were on multi-use paths, sidewalks and  
25 local streets tended to have more severe injuries than those who crashed on major streets; significant  
26 associations were observed for certain associations with ambulance transport and hospital admission.  
27  
28 Crashes at intersections had inconsistent results; the only significant odds ratio indicated that those  
29 injured at an intersection were less likely to stop their trip by bike. Downhill grades were consistently  
30 related to greater injury severity, significantly so for transportation by ambulance. The same pattern  
31 was observed for higher average motor vehicle speeds at the crash location. Time of day and  
32 presence of streetcar tracks were both significant in some unadjusted analyses, but did not remain so  
33 in multiple regression.  
34  
35  
36  
37  
38  
39  
40  
41  
42  
43  
44  
45  
46  
47

48 The following independent variables were not associated with any of the injury severity metrics in  
49 unadjusted analyses and were not included in multiple regression: whether the participant had taken  
50 a cycling training course or had a driver's license; weather; use of a helmet, visible clothing on the  
51 trunk, or bike lights; alcohol or drug use in the 6 hours prior to the trip; presence of bike signage,  
52 junctions, or construction; and distance visible along the route.  
53  
54  
55  
56  
57  
58  
59  
60

**Table 3.** Odds ratios (OR) and 95% confidence intervals (CI) for associations between metrics of injury severity and personal, trip, crash circumstance, and route characteristics (N=683). Multiple logistic regression models; all independent variables significant in at least one unadjusted analysis included.

|                                                         | Did not continue<br>by bike<br>N=528 (77%)<br>OR (95% CI) | Transported to<br>hospital by<br>ambulance<br>N=251 (37%)<br>OR (95% CI) | Admitted to<br>hospital<br>N=60 (8.8%)<br>OR (95% CI) | CTAS †<br>1 or 2, N=75 (11%)<br>3, N=284 (42%)<br>4 or 5, N=320 (47%)<br>OR (95% CI) |
|---------------------------------------------------------|-----------------------------------------------------------|--------------------------------------------------------------------------|-------------------------------------------------------|--------------------------------------------------------------------------------------|
| <b>Sex</b>                                              |                                                           |                                                                          |                                                       |                                                                                      |
| Male                                                    | 1 (reference)                                             | 1 (reference)                                                            | 1 (reference)                                         | 1 (reference)                                                                        |
| Female                                                  | <b>1.91 (1.26 – 2.92)</b>                                 | 1.34 (0.93 – 1.93)                                                       | 1.07 (0.59 – 1.94)                                    | 0.98 (0.71 – 1.35)                                                                   |
| <b>Age</b>                                              |                                                           |                                                                          |                                                       |                                                                                      |
| 19 to 29                                                | 1 (reference)                                             | 1 (reference)                                                            | 1 (reference)                                         | 1 (reference)                                                                        |
| 30 to 39                                                | 1.15 (0.70 – 1.88)                                        | 1.18 (0.75 – 1.85)                                                       | 1.18 (0.54 – 2.61)                                    | 1.29 (0.87 – 1.91)                                                                   |
| 40 to 49                                                | 1.22 (0.70 – 2.14)                                        | 1.40 (0.83 – 2.34)                                                       | 1.96 (0.89 – 4.33)                                    | <b>2.07 (1.33 – 3.23)</b>                                                            |
| 50 to 59                                                | 1.50 (0.77 – 2.95)                                        | 1.04 (0.57 – 1.91)                                                       | 1.02 (0.35 – 2.97)                                    | 1.57 (0.95 – 2.62)                                                                   |
| ≥ 60                                                    | 1.33 (0.63 – 2.82)                                        | <b>2.57 (1.31 – 5.05)</b>                                                | <b>3.52 (1.37 – 9.04)</b>                             | 1.42 (0.78 – 2.60)                                                                   |
| <b>Considered themselves<br/>an experienced cyclist</b> |                                                           |                                                                          |                                                       |                                                                                      |
| No                                                      | 1 (reference)                                             | 1 (reference)                                                            | 1 (reference)                                         | 1 (reference)                                                                        |
| Yes                                                     | 1.36 (0.63 – 2.95)                                        | 2.16 (0.97 – 4.83)                                                       | 1.03 (0.28 – 3.84)                                    | 1.52 (0.78 – 2.95)                                                                   |
| <b>Cycling frequency °</b>                              |                                                           |                                                                          |                                                       |                                                                                      |
|                                                         | 1.00 (0.78 – 1.76)                                        | 0.92 (0.72 – 1.08)                                                       | 1.18 (0.85 – 1.50)                                    | <b>1.18 (1.00 – 1.38)</b>                                                            |
| <b>Time of day</b>                                      |                                                           |                                                                          |                                                       |                                                                                      |
| Day                                                     | 1 (reference)                                             | 1 (reference)                                                            | 1 (reference)                                         | 1 (reference)                                                                        |
| Dusk or dawn                                            | 0.65 (0.33 – 1.29)                                        | 0.53 (0.24 – 1.13)                                                       | 0.75 (0.21 – 2.62)                                    | 0.72 (0.39 – 1.30)                                                                   |
| Night                                                   | 0.90 (0.53 – 1.54)                                        | 1.16 (0.71 – 1.90)                                                       | 1.87 (0.90 – 3.86)                                    | 0.90 (0.58 – 1.40)                                                                   |
| <b>Motor vehicle collision</b>                          |                                                           |                                                                          |                                                       |                                                                                      |
| No                                                      | 1 (reference)                                             | 1 (reference)                                                            | 1 (reference)                                         | 1 (reference)                                                                        |
| Yes                                                     | <b>3.46 (2.07 – 5.76)</b>                                 | <b>3.66 (2.44 – 5.48)</b>                                                | 1.27 (0.63 – 2.54)                                    | <b>2.03 (1.41 – 2.90)</b>                                                            |
| <b>Route type</b>                                       |                                                           |                                                                          |                                                       |                                                                                      |
| Major street                                            | 1 (reference)                                             | 1 (reference)                                                            | 1 (reference)                                         | 1 (reference)                                                                        |
| Local street                                            | 1.08 (0.61 – 1.92)                                        | 1.44 (0.86 – 2.39)                                                       | <b>2.76 (1.15 – 6.62)</b>                             | 1.18 (0.75 – 1.84)                                                                   |
| Sidewalk                                                | 1.15 (0.42 – 3.19)                                        | <b>3.72 (1.37 – 10.1)</b>                                                | 3.26 (0.51 – 20.7)                                    | 1.31 (0.56 – 3.06)                                                                   |
| Multi-use path                                          | 1.33 (0.52 – 3.44)                                        | 2.18 (0.83 – 5.77)                                                       | <b>7.56 (1.43 – 40.0)</b>                             | 1.22 (0.55 – 2.68)                                                                   |
| Bicycle-specific<br>infrastructure                      | 0.98 (0.50 – 1.94)                                        | 1.02 (0.55 – 1.89)                                                       | 0.89 (0.27 – 2.99)                                    | 1.27 (0.74 – 2.18)                                                                   |
| <b>Intersection</b>                                     |                                                           |                                                                          |                                                       |                                                                                      |
| No                                                      | 1 (reference)                                             | 1 (reference)                                                            | 1 (reference)                                         | 1 (reference)                                                                        |
| Yes                                                     | <b>0.57 (0.36 – 0.88)</b>                                 | 1.44 (0.98 – 2.13)                                                       | 1.04 (0.53 – 2.04)                                    | 0.89 (0.63 – 1.26)                                                                   |
| <b>Streetcar or train tracks</b>                        |                                                           |                                                                          |                                                       |                                                                                      |
| No                                                      | 1 (reference)                                             | 1 (reference)                                                            | 1 (reference)                                         | 1 (reference)                                                                        |
| Yes                                                     | 1.11 (0.65 – 1.91)                                        | 1.03 (0.63 – 1.70)                                                       | 0.98 (0.39 – 2.47)                                    | 1.36 (0.88 – 2.10)                                                                   |
| <b>Grade</b>                                            |                                                           |                                                                          |                                                       |                                                                                      |



|                                               |                    |                           |                    |                    |
|-----------------------------------------------|--------------------|---------------------------|--------------------|--------------------|
| Flat or uphill                                | 1 (reference)      | 1 (reference)             | 1 (reference)      | 1 (reference)      |
| Downhill                                      | 1.32 (0.89 – 1.96) | <b>1.62 (1.14 – 2.32)</b> | 1.23 (0.68 – 2.22) | 1.31 (0.96 – 1.79) |
| <b>Motor vehicle speed <math>\beta</math></b> | 1.05 (0.89 – 1.24) | <b>1.21 (1.01 – 1.43)</b> | 1.24 (0.91 – 1.69) | 1.08 (0.94 – 1.24) |

† CTAS = Canadian Triage and Acuity Scale, grouped into 3 categories for analysis using ordinal logistic regression; the odds ratio represents the comparison of categories 1 & 2 vs. 3, 4 & 5 and categories 1, 2 & 3 vs. 4 & 5 under the proportional odds assumption. The proportional odds assumption was met, meaning that the odds ratios for these two comparisons are equivalent.

° Mean cycling frequency = 152 trips/y, SD = 81 trips/y; Odds ratios and confidence intervals calculated for a one standard deviation increase

$\beta$  Mean motor vehicle speed = 36 km/h, SD = 9.5 km/h; odds ratios and confidence intervals calculated for a one standard deviation increase. This is a mean of means: 683 sites, each with 5 speed measurements taken during the site observation period (~30 minutes), then averaged. Speeds were measured using a Bushnell Velocity Speed Gun (Overland Park, KS).

## DISCUSSION

In this study, using four severity metrics that spanned rider self-evaluation (unable to continue by bike) to clinical-practitioner evaluation (CTAS), we found that the following characteristics were associated with more severe injuries: older age; female sex; more experience and frequency of cycling; collision with a motor vehicle; crash on a multi-use path, sidewalk or local street, at non-intersection location, on a downhill grade, and at locations with higher motor vehicle speeds.

### Personal Characteristics

Older age has frequently been associated with more severe injuries in bicycling crashes.[19-22, 29-33]

We observed the same for all metrics, though the odds ratio was not always statistically significant.

This pattern is attributed to increasing frailty with age and has been observed for all vulnerable road users.[32]

Although sex has frequently been associated with bicycling injury severity, the evidence does not show a clear pattern. We found that women were less likely to continue their trip by bicycle and had a non-significant increased chance of ambulance transport. Moore *et al.* found women to have more severe injuries,[31] but others have found higher severities in men.[19,22,32] Theories for each of these results are available. The smaller average size of women may make them more vulnerable and

1  
2  
3 men may be more comfortable handling minor injuries without help. A greater propensity for risk-  
4 taking and speed may provide opportunities for men to have higher impact crashes.[34-36]  
5  
6

7  
8 We found that experienced cyclists and those who cycled more frequently had greater injury severity  
9 (more likely to need ambulance transport, or to have a more urgent triage score, respectively).  
10

11 Similarly Heesh *et al.* found that frequent and experienced cyclists had more severe injuries.[21]  
12

13 These cyclists may travel at higher speeds and incur higher impact forces in a crash.  
14  
15

### 16 17 18 **Crash Circumstances** 19

20 About a third of the injuries were collisions with motor vehicles. These were strongly associated  
21 with three of our four injury severity metrics. In other research, collisions with motor vehicles have  
22 consistently been associated with increased severity.[11,19-22] Collisions with larger vehicles have  
23 resulted in more severe injuries and fatalities.[29,31,33,37]  
24  
25  
26  
27

28 Previous analyses of our study data showed that collisions with motor vehicles were associated with  
29 route type.[38] They never occurred on off-street bike paths or on cycle tracks (separated bike lanes),  
30 and were over-represented on major streets with parked cars and no bike infrastructure. Therefore,  
31 for the severity analyses presented here, we considered whether route type confounded the  
32 association between collision with a motor vehicle and severity (and vice versa), but this was not the  
33 case, nor was there interaction between the two variables (data not shown).  
34  
35  
36  
37  
38  
39  
40  
41  
42  
43  
44

45 The severity of direct collisions with motor vehicles provides clear rationale for transportation  
46 planners to minimize interactions between cyclists and vehicles. This planning approach is  
47 supported by the results of our earlier analyses of injury risk: cycle tracks (bike lanes that physically  
48 separate cyclists and motor vehicle traffic) were associated with 1/9<sup>th</sup> the risk compared to streets  
49 with no bicycle infrastructure.[17] Separating modes of traffic with large differences in speed and  
50 mass is a principle used by countries such as Sweden, Germany, Denmark and the Netherlands  
51  
52  
53  
54  
55  
56  
57  
58  
59  
60

1  
2  
3 where bicycling injury risk is much lower than in North America.[6,8] A rationale for this approach  
4  
5 is that human error is inevitable, so it is important to minimize the consequences of such errors.  
6  
7 Bicycling facilities separated from motor vehicles minimize the likelihood of a collision and the  
8  
9 potential for severe injury when either a driver or a cyclist makes an error.  
10  
11

### 12 13 **Route Characteristics**

14  
15 Our main interest in this analysis was to determine whether route characteristics were associated  
16  
17 with increased or reduced injury severity. Route type, presence of an intersection, grade, and average  
18  
19 motor vehicle speed at the crash location were all associated with injury severity.  
20  
21

22  
23 In comparison to crashes on major streets without cycling infrastructure, crashes on sidewalks and  
24  
25 multi-use paths had considerably higher odds of ambulance transport (odds ratio for multi-use paths  
26  
27 not significant). Crashes on sidewalks and multi-use paths also had considerably higher odds of  
28  
29 hospital admission (odds ratio for sidewalks not significant). In our earlier analyses of injury risk,  
30  
31 multi-use paths and sidewalks had among the highest risks, despite being off-street.[17,18] The  
32  
33 increased severity after a crash adds to concern about these route types. Local streets (mainly  
34  
35 residential streets) were found to be a safe route type in our earlier analyses, with only about half the  
36  
37 injury risk.[17] The current analysis indicates that if a crash did occur, there was an increased odds of  
38  
39 one severity measure – hospitalization.  
40  
41  
42  
43

44  
45 Few studies have examined route type and injury severity. De Rome *et al.* found that more severe  
46  
47 injuries were associated with crashes in traffic and on multi-use paths, and less severe with crashes in  
48  
49 bike lanes and on sidewalks.[25] Slaughter *et al.* found lower severity in bike lane crashes.[39] In  
50  
51 earlier analyses of our study, bicycle-specific infrastructure was found to have lower injury crash risk  
52  
53 than major streets without such infrastructure,[17] but the current analysis indicates that if a crash  
54  
55 did occur, injury severity was similar. This may in part be because most of the injury sites with  
56  
57  
58  
59  
60

1  
2  
3 bicycle-specific infrastructure in our study were bike lanes without physical separation from motor  
4  
5 vehicles.  
6  
7

8 Intersection vs. non-intersection crash locations did not present a clear pattern of association with  
9  
10 severity in this study. Moore *et al.* found differing patterns of injury severity at intersections and non-  
11  
12 intersections.[31]  
13

14  
15 Downhill grade was significantly associated with increased severity for all metrics in unadjusted  
16  
17 analyses, and remained significant in the final model for ambulance transport. Three previous studies  
18  
19 have shown that injury severity is greater with grades.[23,24,31] Downhill grade is likely to be  
20  
21 associated with increased cyclist (and motor vehicle) speed, and therefore increased force of impact.  
22  
23 Our earlier analyses found that downhill slopes were associated with higher injury risk, and that  
24  
25 uphill grades deter cycling.[15,17,18] This suggests that, wherever possible, routing bicycle facilities  
26  
27 where slopes are gentle is a good strategy for both reducing injuries and motivating cycling.  
28  
29  
30

31  
32 Higher average motor vehicle speed was associated with increased severity for all metrics, and  
33  
34 remained significant in the final model for ambulance transport. Other studies found higher speed  
35  
36 roads to be associated with greater injury severity to cyclists.[23,24,37] Our earlier analyses found  
37  
38 that injury risk was higher at intersections where motor vehicle speeds were greater than 30 km/h  
39  
40 and that routes with high vehicle speeds deter cycling.[15,18] This supports recent changes in some  
41  
42 European and North American cities to lower urban speed limits.  
43  
44  
45

### 46 47 **Trip Characteristics**

48  
49 Only one trip characteristic was associated with injury severity. Time of day (night riding) was  
50  
51 associated with a higher odds of hospital admission in unadjusted analyses and was elevated but not  
52  
53 significant in multiple regression. Night-time riding has been associated with increased injury  
54  
55 severity in other studies, especially where roadways were not lit.[24,29,32,33]  
56  
57  
58  
59  
60

1  
2  
3 Although much of the bicycle safety literature focuses on helmets and head injury mitigation,  
4 [22,37,40,41,42] helmet use was not associated with any of the severity metrics in this study. Both  
5  
6 biomechanical studies[42] and epidemiological studies[22,37,40,41] have demonstrated that helmets  
7  
8 can prevent serious skull and brain injuries. This study was not limited to head injuries, likely  
9  
10 contributing to our result that helmet use was not associated with injury severity. In one of the  
11  
12 largest studies to examine helmets, their use was found to significantly reduce head injuries, but was  
13  
14 not associated with serious injury mitigation across all body regions.[22,41] In this context, it is  
15  
16 important to recognize that cyclists may sustain injuries, including serious trauma, to any body part,  
17  
18 including their thorax, abdomen, neck and extremities.[22] A helmet can do nothing to prevent non-  
19  
20 head injuries. Our earlier analyses of injury risk show the potential for all injuries to be significantly  
21  
22 decreased for cyclists separated from motor vehicle traffic in a cycle track or a local street with  
23  
24 traffic diversion[17,18] and the present results show that injury severity significantly increases in a  
25  
26 collision with a motor vehicle. Together these results point to bicycle infrastructure that physically  
27  
28 separates cyclists from motor vehicle traffic to prevent trauma to any area of the body.  
29  
30  
31  
32  
33  
34

### 35 36 **Strengths and limitations**

37  
38 Strengths of the study include two study cities with differing climates, terrain, cycling mode shares  
39  
40 and cycling infrastructure, an urban-only cycling sample, the prospective accrual of subjects,  
41  
42 observation of route characteristics blinded to whether the site was an injury site, and the number of  
43  
44 clinical and cyclist self-report severity metrics.  
45  
46

47  
48 Study limitations include a relatively small sample of injured cyclists, restriction to Canadian cities  
49  
50 and lack of data on the anatomical location of the injury. As in all injury studies, only a portion of  
51  
52 injured cyclists were included; here, those whose injuries were serious enough to be treated at a  
53  
54 hospital emergency department, but not to cause death or a head injury so severe that the trip could  
55  
56  
57  
58  
59  
60

1  
2  
3 not be recalled. This reduced the pool of the most severely injured cases: 2 potential participants  
4 were fatally injured, 26 of those contacted could not remember their route, and 7 could not recall  
5 their crash circumstances. An unknown number of cyclists had injuries so minor that no emergency  
6 department visit was made.  
7  
8  
9  
10  
11

12  
13 **Our overall study** had a case-crossover design that compared injury sites to control sites within a  
14 person-trip, fully controlling for differences between individuals and trips that might confound the  
15 relationship between injury risk and infrastructure (the primary focus of the study). To examine  
16 severity of injuries in the current analysis, the analysis was restricted **to cases only, comparing**  
17 **participants with more severe injuries to those with less severe injuries**, introducing the potential for  
18 confounding by personal and trip characteristics. We addressed this via adjustment in our regression  
19 models, but the potential for uncontrolled confounding by unmeasured characteristics remains.  
20  
21  
22  
23  
24  
25  
26  
27  
28

29  
30 Given that we did not have data on more traditional measures of severity, the Abbreviated Injury  
31 Scale and Injury Severity Score, it is important to consider our outcome metrics, their relationship to  
32 each other and their potential reliability and validity as measures of severity. The four metrics  
33 measured different aspects of severity, as described above (Figure 1, Table 2).  
34  
35  
36  
37  
38

39  
40 Hospital admission is based on an in depth medical assessment and should reflect the most severe  
41 injuries. There are no standardized decision criteria, and physicians' decisions to admit emergency  
42 department patients to hospital have been found to differ substantially.[43] Data from Rivara *et al.*  
43 were available to compare hospitalization to Injury Severity Scores above *vs.* below 9.[22] **They**  
44 **found that those with higher scores were 43 times more likely to be admitted to hospital.**  
45  
46  
47  
48  
49  
50

51  
52 Hospitalization had high specificity (0.94) but lower sensitivity (0.72), suggesting that few patients  
53 with minor injuries are admitted to hospital, but some who are severely injured are not admitted.  
54

55  
56 This could be because some patients with severe injuries (e.g., some extremity fractures, intra-  
57  
58  
59  
60

1  
2  
3 abdominal trauma) may be treated and stabilized in an emergency department then discharged home,  
4  
5 but scheduled for later surgical repair. This may have contributed to our somewhat different results  
6  
7 for hospital admission and its lower correlations with the other metrics.  
8  
9

10 Ambulance transport is based, in part, on whether or not someone at the scene called an ambulance.  
11  
12 It had the strongest correlations with all other outcome metrics. Data from Lang *et al.* were available  
13  
14 to compare ambulance transport to Injury Severity Scores above *vs.* below 12.[44] Ambulance  
15  
16 transfer had low specificity (0.26) but high sensitivity (0.95), opposite to the pattern for  
17  
18 hospitalization. This suggests that most severely injured patients are transported by ambulance, but  
19  
20 so are many who are not severely injured.  
21  
22  
23

24  
25 The CTAS scale is based on assessment by a triage nurse of a standardized list of presenting  
26  
27 complaints, vital sign modifiers, and pain severity.[27] Certain injury mechanisms, e.g., being hit by a  
28  
29 motor vehicle, may be assigned a greater urgency score. CTAS has been frequently tested for  
30  
31 reliability, with kappas for agreement beyond chance spanning a broad range from 0.25 to 0.89.[28]  
32  
33 We found no comparison of CTAS to Injury Severity Scores. We found no validity or reliability data  
34  
35 for continuing to cycle.  
36  
37  
38  
39  
40  
41

## 42 CONCLUSIONS

43  
44  
45 In two of Canada's largest cities, approximately one-third of the bicycle crashes were collisions with  
46  
47 a motor vehicle and the resulting injuries were more severe than in other crash circumstances.

48  
49 Certain route types (in particular multi-use paths and sidewalks), downhill grades, and higher motor  
50  
51 vehicle speeds were also associated with increased injury severity. These results suggest an urgent  
52  
53 need to provide bike facilities that separate cyclists from motor vehicle traffic, that minimize slopes  
54  
55 and have lower motor vehicle speeds, and that are designed specifically for bicycling rather than for  
56  
57  
58  
59  
60

1  
2  
3 sharing with pedestrians. These bicycle infrastructure modifications would reduce both crashes and  
4  
5 injury severity after a crash.  
6  
7  
8  
9

10  
11 **ACKNOWLEDGEMENTS:** We would like to thank all the study participants for generously  
12 contributing their time. We appreciate the work of study staff, hospital personnel and our city and  
13 community collaborators. This study evolved from work conducted in the University of British  
14 Columbia's Bridge Program Grant Development course (2005-2006) and benefitted from input  
15 from the participants of that class.  
16  
17  
18  
19  
20  
21  
22  
23

24 **CONTRIBUTORS:** KT, MAH, CCOR, and PC were responsible for initial conception and design  
25 of the study. KT, MAH, CCOR, PC, MW, SB, MC, MDC, JB, SMF, Garth Hunte and Kishore  
26 Mulpuri were responsible for the funding proposal. CCOR, MAH, MW, MDC, KT, Melody Monroe  
27 and Lee Vernich designed and tested data collection instruments. MW, HS and KT developed  
28 algorithms for defining route infrastructure. HS was responsible for data analyses. All authors had  
29 full access to the results of all analyses. PC, HS and KT drafted the article. All authors contributed to  
30 study design and implementation, analysis decisions, interpretation of results, and critical revision of  
31 the article. Evan Beaupré, Niki Blakely, Jill Dalton, Martin Kang, Kevin McCurley, and Andrew  
32 Thomas were responsible for interviews or site observations. Vartouji Jazmaji, Melody Monroe and  
33 Lee Vernich were responsible for supervision and training of study staff, and recruitment of  
34 participants. Barb Boychuk, Jan Buchanan, Doug Chisholm, Nada Elfeki, Garth Hunte, JB, SMF,  
35 and MDC contributed to identification of injured cyclists at the study hospitals. Jack Becker, Bonnie  
36 Fenton, David Hay, Nancy Smith Lea, Peter Sary, Fred Sztabinski, David Tomlinson, and Barbara  
37 Wentworth reviewed the study protocol, data collection forms, and infrastructure definitions from  
38  
39  
40  
41  
42  
43  
44  
45  
46  
47  
48  
49  
50  
51  
52  
53  
54  
55  
56  
57  
58  
59  
60



1  
2  
3 the perspective of professionals or advocates involved in cycling transportation. Data were double  
4 entered by Express Data Ltd.  
5  
6  
7

8  
9 **FUNDING:** This work was supported by a grant from the Heart and Stroke Foundation of Canada  
10 and the Canadian Institutes of Health Research (Institute of Musculoskeletal Health and Arthritis  
11 and Institute of Nutrition, Metabolism and Diabetes) (Grant number: BEO-85863). J. R. Brubacher,  
12 M.A. Harris, and M. Winters were supported by salary awards from the Michael Smith Foundation  
13 for Health Research. M. A. Harris, C. C. O. Reynolds, and M. Winters were supported by salary  
14 awards from the Canadian Institutes of Health Research.  
15  
16  
17  
18  
19  
20  
21  
22

23 **COMPETING INTERESTS:** None.  
24  
25

26 **PATIENT CONSENT:** Obtained  
27  
28  
29

30 **ETHICS APPROVAL:** The study methods were reviewed and approved by the human subjects  
31 ethics review boards of the University of British Columbia (BREB REB H06-03833), the University  
32 of Toronto (#22628), St. Paul's Hospital (BREB REB H06-03833), Vancouver General Hospital  
33 (#V07-0275), St. Michael's Hospital (REB 08-046C), and the University Health Network (Toronto  
34 General Hospital and Toronto Western Hospital; REB 07-0839-AE). All participants gave informed  
35 consent before taking part in the study.  
36  
37  
38  
39  
40  
41  
42

43 **DATA SHARING STATEMENT:** The study database was compiled from interviews with study  
44 participants and site observations by study personnel. It cannot be shared by the authors with  
45 anyone without approval from the University and Hospital human subjects review boards.  
46  
47  
48  
49  
50  
51  
52  
53  
54  
55  
56  
57  
58  
59  
60

## Figure Legend

**Figure 1.** Metrics of severity of cycling injuries to 683 study participants, stratified by CTAS.  
CTAS = Canadian Triage and Acuity Scale, where 5 is the least medically urgent and 1 is the most.

**Figure 2.** Crash circumstances vs. metrics of severity.  
Collisions could be with a motor vehicle, obstacle, surface feature, cyclist, pedestrian, or animal. Motor vehicle “involved” includes both direct collisions with vehicles and crashes resulting from manoeuvres to avoid a motor vehicle.

For peer review only

## REFERENCES

1. Hamer M, Chida Y. Active commuting and cardiovascular risk: a meta-analytic review. *Prev Med* 2008;46(1):9–13
2. Wen LM, Rissel C. Inverse associations between cycling to work, public transport, and overweight and obesity: findings from a population based study in Australia. *Prev Med* 2008;46(1):29–32
3. Beck LF, Dellinger AM, O’Neil ME. Motor vehicle crash injury rates by mode of travel, United States: using exposure-based methods to quantify differences. *Am J Epidemiol* 2007;166(2):212–218
4. Teschke K, Harris MA, Reynolds CCO, *et al.* Exposure-based traffic crash injury rates by mode of travel in British Columbia. *Can J Public Health* 2013;104(1):e75–79
5. Parkin J. Comparisons of cycle use for the journey to work from the ’81, ’91 and 2001 censuses. *Traffic Eng Control* 2003;44(8):299–302
6. Pucher J, Buehler R. Making cycling irresistible: lessons from the Netherlands, Denmark and Germany. *Transp Rev* 2008;28(4):495–528
7. Pucher J, Buehler R, Seinen M. Bicycling renaissance in North America? An update and re-appraisal of cycling trends and policies. *Transp Res Part A Policy Pract* 2011;45(6):451–475
8. Jacobsen PL. Safety in numbers: more walkers and bicyclists, safer walking and bicycling. *Inj Prev* 2003;9(3):205–209.
9. NHTSA *Traffic Safety Facts 2010 Data. Bicyclists and other cyclists.* 2010
10. Transport Canada. *Canadian Motor Vehicle Traffic Collision Statistics: 2010.* 2013
11. Hamann C, Peek-Asa C. On-road bicycle facilities and bicycle crashes in Iowa, 2007–2010. *Accid Anal Prev* 2013;56:103–109

- 1  
2  
3 12. Canadian Institute for Health Information. *Cycling Injury Hospitalizations in Canada, 2009-2010*.  
4  
5 2012  
6
- 7  
8 13. Noland RB. Perceived risk and modal choice: risk compensation in transportation systems.  
9  
10 *Accid Anal Prev* 1995;27(4):503–521  
11
- 12 14. Ogilvie D, Egan M, Hamilton V, *et al*. Promoting walking and cycling as an alternative to  
13 using cars: systematic review. *BMJ* 2004;329(7469):763  
14
- 15 15. Winters M, Brauer M, Setton EM, *et al*. Built environment influences on healthy  
16 transportation choices: bicycling versus driving. *J Urban Health* 2010;87(6):969–993  
17
- 18 16. Reynolds CC., Anne Harris M, Teschke K, *et al*. The impact of transportation infrastructure  
19 on bicycling injuries and crashes: a review of the literature. *Environ Health* 2009;8(1):1–19  
20
- 21 17. Teschke K, Harris MA, Reynolds CCO, *et al*. Route infrastructure and the risk of injuries to  
22 bicyclists: A case-crossover study. *Am J Public Health* 2012;102(12):2336–2343  
23
- 24 18. Harris MA, Reynolds CCO, Winters M, *et al*. Comparing the effects of infrastructure on  
25 bicycling injury at intersections and non-intersections using a case-crossover design. *Inj Prev*  
26 2013;19:303-310  
27
- 28 19. Boström L, Nilsson B. A review of serious injuries and deaths from bicycle accidents in  
29 Sweden from 1987 to 1994. *J Trauma* 2001;50(5):900–907  
30
- 31 20. Chong S, Poulos R, Olivier J, *et al*. Relative injury severity among vulnerable non-motorised  
32 road users: comparative analysis of injury arising from bicycle-motor vehicle and bicycle-  
33 pedestrian collisions. *Accid Anal Prev* 2010;42(1):290–296  
34
- 35 21. Heesch KC, Garrard J, Sahlqvist S. Incidence, severity and correlates of bicycling injuries in  
36 a sample of cyclists in Queensland, Australia. *Accid Anal Prev* 2011;43(6):2085–2092  
37
- 38 22. Rivara FP, Thompson DC, Thompson RS. Epidemiology of bicycle injuries and risk factors  
39 for serious injury. *Inj Prev* 1997;3(2):110–114  
40  
41  
42  
43  
44  
45  
46  
47  
48  
49  
50  
51  
52  
53  
54  
55  
56  
57  
58  
59  
60

- 1  
2  
3  
4  
5  
6  
7  
8  
9  
10  
11  
12  
13  
14  
15  
16  
17  
18  
19  
20  
21  
22  
23  
24  
25  
26  
27  
28  
29  
30  
31  
32  
33  
34  
35  
36  
37  
38  
39  
40  
41  
42  
43  
44  
45  
46  
47  
48  
49  
50  
51  
52  
53  
54  
55  
56  
57  
58  
59  
60
23. Allen-Munley C, Daniel J, Dhar S. Logistic model for rating urban bicycle route safety. *Transp Res Rec* 2004;1878(-1):107–115
  24. Klop J, Khattak A. Factors influencing bicycle crash severity on two-lane, undivided roadways in North Carolina. *Transp Res Rec* 1999;1674(-1):78–85
  25. De Rome L, Boufous S, Georgeson T, *et al.* Bicycle crashes in different riding environments in the Australian capital territory. *Traffic Inj Prev* 2014;15(1):81–88
  26. Harris MA, Reynolds CCO, Winters M, *et al.* The Bicyclists' Injuries and the Cycling Environment study: a protocol to tackle methodological issues facing studies of bicycling safety. *Inj Prev* 2011.
  27. Bullard MJ, Under B, Spence J, *et al.* Revisions to the Canadian Emergency department Triage and Acuity Scale (CTAS) adult guidelines. *CJEM* 2008;10:136-142
  28. Christ M, Grossman F, Winter D, *et al.* Modern triage in the emergency department. *Dtsch Arztebl Int* 2010;107:892-898
  29. Kim J-K, Kim S, Ulfarsson GF, *et al.* Bicyclist injury severities in bicycle-motor vehicle accidents. *Accid Anal Prev* 2007;39(2):238–251
  30. Lustenberger T, Inaba K, Talving P, *et al.* Bicyclists injured by automobiles: relationship of age to injury type and severity--a national trauma databank analysis. *J Trauma* 2010;69(5):1120–1125
  31. Moore DN, Schneider WH, Savolainen PT, *et al.* Mixed logit analysis of bicyclist injury severity resulting from motor vehicle crashes at intersection and non-intersection locations. *Accid Anal Prev* 2011;43(3):621–630
  32. Rifaat SM, Tay R, de Barros A. Effect of street pattern on the severity of crashes involving vulnerable road users. *Accid Anal Prev* 2011;43(1):276–283

- 1  
2  
3  
4 33. Yan X, Ma M, Huang H, *et al.* Motor vehicle–bicycle crashes in Beijing: Irregular maneuvers,  
5 crash patterns, and injury severity. *Accid Anal Prev* 2011;43(5):1751–1758  
6  
7  
8 34. Begg DJ, Langley JD, Stephenson S. Identifying factors that predict persistent driving after  
9 drinking, unsafe driving after drinking, and driving after using cannabis among young adults.  
10  
11 *Accid Anal Prev* 2003;35(5):669–675  
12  
13  
14 35. Nieves JW, Formica C, Ruffing J, *et al.* Males have larger skeletal size and bone mass than  
15 females, despite comparable body size. *J Bone Miner Res* 2005;20(3):529–535  
16  
17  
18 36. Wu C, Yao L, Zhang K. The red-light running behavior of electric bike riders and cyclists at  
19 urban intersections in China: an observational study. *Accid Anal Prev* 2012;49:186–192  
20  
21  
22 37. Bambach MR, Mitchell RJ, Grzebieta RH, *et al.* The effectiveness of helmets in bicycle  
23 collisions with motor vehicles: A case-control study. *Accid Anal Prev* 2013;53:78–88  
24  
25  
26 38. Teschke K, Frendo T, Shen H, *et al.* Do bicycling crash circumstances vary by route type? A  
27 cross-sectional study. *BMC Public Health* 2014;14:1205  
28  
29  
30 39. Slaughter DR, Williams N, Wall SP, *et al.* A community traffic safety analysis of pedestrian  
31 and bicyclist injuries based on the catchment area of a trauma center. *J Trauma Acute Care*  
32 *Surg* 2014;76(4):1103–1110  
33  
34  
35 40. Elvik R. Publication bias and time-trend bias in meta-analysis of bicycle helmet efficacy: A  
36 re-analysis of Attewell, Glase and McFadden, 2001. *Accid Anal Prev* 2011;43(3):1245–1251  
37  
38  
39 41. Thompson DC, Rivara FP, Thompson RS. Effectiveness of bicycle safety helmets in  
40 preventing head injuries. A case-control study. *JAMA* 1996;276(24):1968–1973  
41  
42  
43 42. Cripton PA, Dressler DM, Stuart CA, *et al.* Bicycle helmets are highly effective at preventing  
44 head injury during head impact: Head-form accelerations and injury criteria for helmeted and  
45  
46  
47  
48  
49  
50  
51  
52  
53  
54  
55  
56  
57  
58  
59  
60

- 1  
2  
3  
4  
5  
6  
7  
8  
9  
10  
11  
12  
13  
14  
15  
16  
17  
18  
19  
20  
21  
22  
23  
24  
25  
26  
27  
28  
29  
30  
31  
32  
33  
34  
35  
36  
37  
38  
39  
40  
41  
42  
43  
44  
45  
46  
47  
48  
49  
50  
51  
52  
53  
54  
55  
56  
57  
58  
59  
60
43. Mutrie D, Bailey SK, Malik S. Individual emergency physician admission rates: predictably unpredictable. *CJEM* 2009;11:149-155
44. Lang J, Dallow N, Lang A, *et al.* Inclusion of minor trauma cases provides a better estimate of the total burden of injury: Queensland Trauma Registry provides a unique perspective. *Injury* 2014;45:1236-1241

For peer review only

1  
2  
3  
4  
5  
6  
7  
8  
9  
10  
11  
12  
13  
14  
15  
16  
17  
18  
19  
20  
21  
22  
23  
24  
25  
26  
27  
28  
29  
30  
31  
32  
33  
34  
35  
36  
37  
38  
39  
40  
41  
42  
43  
44  
45  
46  
47  
48  
49  
50  
51  
52  
53  
54  
55  
56  
57  
58  
59  
60

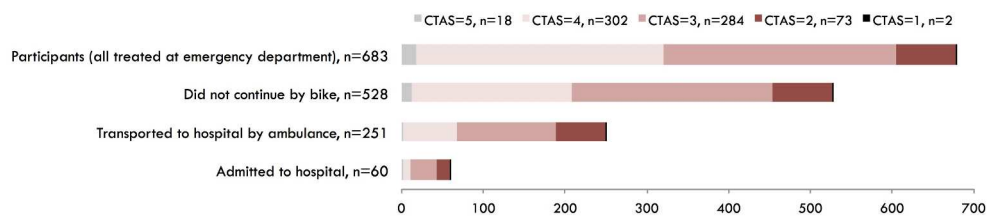

242x55mm (300 x 300 DPI)

Or peer review only



1  
2  
3  
4  
5  
6  
7  
8  
9  
10  
11  
12  
13  
14  
15  
16  
17  
18  
19  
20  
21  
22  
23  
24  
25  
26  
27  
28  
29  
30  
31  
32  
33  
34  
35  
36  
37  
38  
39  
40  
41  
42  
43  
44  
45  
46  
47  
48  
49  
50  
51  
52  
53  
54  
55  
56  
57  
58  
59  
60

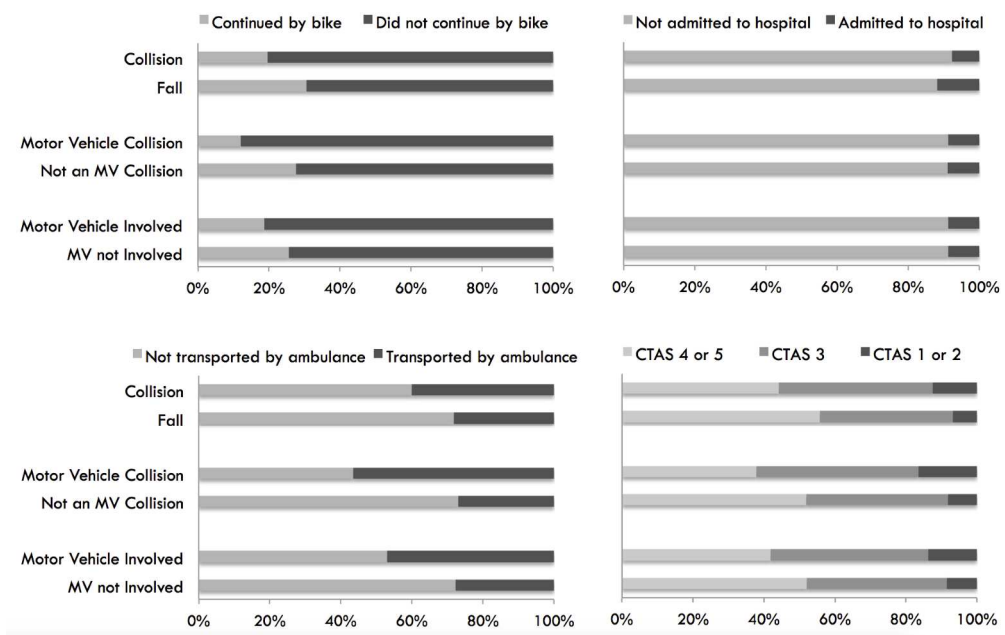

645x404mm (300 x 300 DPI)

Review only
